# Supplementary material
Source: PubMed Central journal article supplement (PMC3245769)
Supplement: NIHMS339416-supplement-01.pdf [file NIHMS339416-supplement-01.pdf]

| t0-t3 |  | SYMBOL    | GENENAME                                                            | ENTREZID |
|-------|--|-----------|---------------------------------------------------------------------|----------|
|       |  | NTS       | neurotensin                                                         | 4922     |
|       |  | NELL2     | NEL-like 2 (chicken)                                                | 4753     |
|       |  | TMPRSS11D | transmembrane protease, serine 11D                                  | 9407     |
|       |  | SOSTDC1   | sclerostin domain containing 1                                      | 25928    |
|       |  | ODZ2      | odz, odd Oz/ten-m homolog 2 (Drosophila)                            | 57451    |
|       |  | TSPAN18   | tetraspanin 18                                                      | 90139    |
|       |  | SPP1      | secreted phosphoprotein 1                                           | 6696     |
|       |  | IGFBP5    | insulin-like growth factor binding protein 5                        | 3488     |
|       |  | AMOT      | angiomin                                                            | 154796   |
|       |  | THSD4     | thrombospondin, type I, domain containing 4                         | 79875    |
|       |  | KCNK10    | potassium channel, subfamily K, member 10                           | 54207    |
|       |  | DAPL1     | death associated protein-like 1                                     | 92196    |
|       |  | TSPAN7    | tetraspanin 7                                                       | 7102     |
|       |  | TNC       | tenascin C                                                          | 3371     |
|       |  | TSPAN12   | tetraspanin 12                                                      | 23554    |
|       |  | GPC3      | glypican 3                                                          | 2719     |
|       |  | RRAGD     | Ras-related GTP binding D                                           | 58528    |
|       |  | FSTL1     | follicle-stimulating hormone-like 1                                 | 11167    |
|       |  | AGR2      | anterior gradient homolog 2 (Xenopus laevis)                        | 10551    |
|       |  | ARHGAP28  | Rho GTPase activating protein 28                                    | 79822    |
|       |  | SLC47A1   | solute carrier family 47, member 1                                  | 55244    |
|       |  | AKR1B10   | aldo-keto reductase family 1, member B10 (aldose reductase)         | 57016    |
|       |  | FXYD6     | FXYD domain containing ion transport regulator 6                    | 53826    |
|       |  | FSTL4     | follicle-stimulating hormone-like 4                                 | 23105    |
|       |  | NEFL      | neurofilament, light polypeptide                                    | 4747     |
|       |  | GHR       | growth hormone receptor                                             | 2690     |
|       |  | SMC1B     | structural maintenance of chromosomes 1B                            | 27127    |
|       |  | GATM      | glycine amidinotransferase (L-arginine:glycine amidinotransferase)  | 2628     |
|       |  | PDGFRA    | platelet-derived growth factor receptor, alpha polypeptide          | 5156     |
|       |  | CNTN1     | contactin 1                                                         | 1272     |
|       |  | EMILIN3   | elastin microfibril interfacier 3                                   | 90187    |
|       |  | OCLN      | occludin                                                            | 4950     |
|       |  | DCLK1     | doublecortin-like kinase 1                                          | 9201     |
|       |  | SIPA1L2   | signal-induced proliferation-associated 1 like 2                    | 57568    |
|       |  | LYPD6B    | LY6/PLAUR domain containing 6B                                      | 130576   |
|       |  | GSTM3     | glutathione S-transferase mu 3 (brain)                              | 2947     |
|       |  | TEX19     | testis expressed 19                                                 | 400629   |
|       |  | NFIB      | nuclear factor I/B                                                  | 4781     |
|       |  | DPYSL2    | dihydropyrimidinase-like 2                                          | 1808     |
|       |  | CTNND2    | catenin (cadherin-associated protein), delta 2 (neural plakophilin) | 1501     |

|  |  |                  |                                                            |        |
|--|--|------------------|------------------------------------------------------------|--------|
|  |  | <b>CPA6</b>      | carboxypeptidase A6                                        | 57094  |
|  |  | <b>GJA1</b>      | gap junction protein, alpha 1, 43kDa                       | 2697   |
|  |  | <b>ACSL1</b>     | acyl-CoA synthetase long-chain family member 1             | 2180   |
|  |  | <b>LOX</b>       | lysyl oxidase                                              | 4015   |
|  |  | <b>RBP7</b>      | retinol binding protein 7, cellular                        | 116362 |
|  |  | <b>S100A8</b>    | S100 calcium binding protein A8                            | 6279   |
|  |  | <b>PCOLCE2</b>   | procollagen C-endopeptidase enhancer 2                     | 26577  |
|  |  | <b>TMEM156</b>   | transmembrane protein 156                                  | 80008  |
|  |  | <b>CRYAB</b>     | crystallin, alpha B                                        | 1410   |
|  |  | <b>RPS6KA6</b>   | ribosomal protein S6 kinase, 90kDa, polypeptide 6          | 27330  |
|  |  | <b>KCNS3</b>     | potassium voltage-gated channel, delayed-rectifier, subfam | 3790   |
|  |  | <b>DLX5</b>      | distal-less homeobox 5                                     | 1749   |
|  |  | <b>AKR1C2</b>    | aldo-keto reductase family 1, member C2 (dihydrodiol deh   | 1646   |
|  |  | <b>APCDD1</b>    | adenomatosis polyposis coli down-regulated 1               | 147495 |
|  |  | <b>PSD3</b>      | pleckstrin and Sec7 domain containing 3                    | 23362  |
|  |  | <b>RNF152</b>    | ring finger protein 152                                    | 220441 |
|  |  | <b>DMRT3</b>     | doublesex and mab-3 related transcription factor 3         | 58524  |
|  |  | <b>PADI3</b>     | peptidyl arginine deiminase, type III                      | 51702  |
|  |  | <b>LRIG1</b>     | leucine-rich repeats and immunoglobulin-like domains 1     | 26018  |
|  |  | <b>CPE</b>       | carboxypeptidase E                                         | 1363   |
|  |  | <b>ADH7</b>      | alcohol dehydrogenase 7 (class IV), mu or sigma polypepti  | 131    |
|  |  | <b>WNT5A</b>     | wingless-type MMTV integration site family, member 5A      | 7474   |
|  |  | <b>GSTA4</b>     | glutathione S-transferase alpha 4                          | 2941   |
|  |  | <b>GABRQ</b>     | gamma-aminobutyric acid (GABA) receptor, theta             | 55879  |
|  |  | <b>MAGEH1</b>    | melanoma antigen family H, 1                               | 28986  |
|  |  | <b>ENO2</b>      | enolase 2 (gamma, neuronal)                                | 2026   |
|  |  | <b>SLC16A14</b>  | solute carrier family 16, member 14 (monocarboxylic acid   | 151473 |
|  |  | <b>SLC16A6</b>   | solute carrier family 16, member 6 (monocarboxylic acid t  | 9120   |
|  |  | <b>C3orf58</b>   | chromosome 3 open reading frame 58                         | 205428 |
|  |  | <b>HEY1</b>      | hairy/enhancer-of-split related with YRPW motif 1          | 23462  |
|  |  | <b>SLC16A9</b>   | solute carrier family 16, member 9 (monocarboxylic acid t  | 220963 |
|  |  | <b>C14orf128</b> | chromosome 14 open reading frame 128                       | 84837  |
|  |  | <b>PRTFDC1</b>   | phosphoribosyl transferase domain containing 1             | 56952  |
|  |  | <b>LBH</b>       | limb bud and heart development homolog (mouse)             | 81606  |
|  |  | <b>BCL11B</b>    | B-cell CLL/lymphoma 11B (zinc finger protein)              | 64919  |
|  |  | <b>SCML2</b>     | sex comb on midleg-like 2 (Drosophila)                     | 10389  |
|  |  | <b>LPIN1</b>     | lipin 1                                                    | 23175  |
|  |  | <b>GPR155</b>    | G protein-coupled receptor 155                             | 151556 |
|  |  | <b>SGEF</b>      | Src homology 3 domain-containing guanine nucleotide exc    | 26084  |
|  |  | <b>HLF</b>       | hepatic leukemia factor                                    | 3131   |
|  |  | <b>KRT14</b>     | keratin 14                                                 | 3861   |

|  |  |                  |                                                                       |        |
|--|--|------------------|-----------------------------------------------------------------------|--------|
|  |  | <b>FDFT1</b>     | farnesyl-diphosphate farnesyltransferase 1                            | 2222   |
|  |  | <b>AKAP6</b>     | A kinase (PRKA) anchor protein 6                                      | 9472   |
|  |  | <b>MTSS1</b>     | metastasis suppressor 1                                               | 9788   |
|  |  | <b>AGPAT9</b>    | 1-acylglycerol-3-phosphate O-acyltransferase 9                        | 84803  |
|  |  | <b>COCH</b>      | coagulation factor C homolog, cochlin (Limulus polyphemus)            | 1690   |
|  |  | <b>3-Sep</b>     | septin 3                                                              | 55964  |
|  |  | <b>KCNJ2</b>     | potassium inwardly-rectifying channel, subfamily J, member 2          | 3759   |
|  |  | <b>TBL1X</b>     | transducin (beta)-like 1X-linked                                      | 6907   |
|  |  | <b>SQLE</b>      | squalene epoxidase                                                    | 6713   |
|  |  | <b>BEX5</b>      | brain expressed, X-linked 5                                           | 340542 |
|  |  | <b>SGPP2</b>     | sphingosine-1-phosphate phosphatase 2                                 | 130367 |
|  |  | <b>ACO1</b>      | aconitase 1, soluble                                                  | 48     |
|  |  | <b>TRIM2</b>     | tripartite motif-containing 2                                         | 23321  |
|  |  | <b>TC2N</b>      | tandem C2 domains, nuclear                                            | 123036 |
|  |  | <b>HMGCS1</b>    | 3-hydroxy-3-methylglutaryl-Coenzyme A synthase 1 (soluble)            | 3157   |
|  |  | <b>MCTP1</b>     | multiple C2 domains, transmembrane 1                                  | 79772  |
|  |  | <b>3-Mar</b>     | membrane-associated ring finger (C3HC4) 3                             | 115123 |
|  |  | <b>CD302</b>     | CD302 molecule                                                        | 9936   |
|  |  | <b>SV2A</b>      | synaptic vesicle glycoprotein 2A                                      | 9900   |
|  |  | <b>KRT6B</b>     | keratin 6B                                                            | 3854   |
|  |  | <b>KRT16</b>     | keratin 16                                                            | 3868   |
|  |  | <b>CHST4</b>     | carbohydrate (N-acetylglucosamine 6-O) sulfotransferase 4             | 10164  |
|  |  | <b>LGMN</b>      | legumain                                                              | 5641   |
|  |  | <b>IGSF9</b>     | immunoglobulin superfamily, member 9                                  | 57549  |
|  |  | <b>GK</b>        | glycerol kinase                                                       | 2710   |
|  |  | <b>ACADSB</b>    | acyl-Coenzyme A dehydrogenase, short/branched chain                   | 36     |
|  |  | <b>LGR5</b>      | leucine-rich repeat-containing G protein-coupled receptor 5           | 8549   |
|  |  | <b>ZNF772</b>    | zinc finger protein 772                                               | 400720 |
|  |  | <b>CPVL</b>      | carboxypeptidase, vitellogenic-like                                   | 54504  |
|  |  | <b>KIAA1324L</b> | KIAA1324-like                                                         | 222223 |
|  |  | <b>EMP1</b>      | epithelial membrane protein 1                                         | 2012   |
|  |  | <b>CYP4F11</b>   | cytochrome P450, family 4, subfamily F, polypeptide 11                | 57834  |
|  |  | <b>EFNB2</b>     | ephrin-B2                                                             | 1948   |
|  |  | <b>MRAP2</b>     | melanocortin 2 receptor accessory protein 2                           | 112609 |
|  |  | <b>FAM102B</b>   | family with sequence similarity 102, member B                         | 284611 |
|  |  | <b>SERPINF1</b>  | serpin peptidase inhibitor, clade F (alpha-2 antiplasmin, protein C1) | 5176   |
|  |  | <b>KRT16</b>     | keratin 16                                                            | 3868   |
|  |  | <b>PCSK9</b>     | proprotein convertase subtilisin/kexin type 9                         | 255738 |
|  |  | <b>PCCB</b>      | propionyl Coenzyme A carboxylase, beta polypeptide                    | 5096   |
|  |  | <b>PDIA6</b>     | protein disulfide isomerase family A, member 6                        | 10130  |
|  |  | <b>COX15</b>     | COX15 homolog, cytochrome c oxidase assembly protein (COX15)          | 1355   |

|  |  |                  |                                                                     |        |
|--|--|------------------|---------------------------------------------------------------------|--------|
|  |  | <b>GK</b>        | glycerol kinase                                                     | 2710   |
|  |  | <b>STEAP1</b>    | six transmembrane epithelial antigen of the prostate 1              | 26872  |
|  |  | <b>FZD3</b>      | frizzled homolog 3 (Drosophila)                                     | 7976   |
|  |  | <b>EFNA3</b>     | ephrin-A3                                                           | 1944   |
|  |  | <b>SCCPDH</b>    | saccharopine dehydrogenase (putative)                               | 51097  |
|  |  | <b>SMO</b>       | smoothened homolog (Drosophila)                                     | 6608   |
|  |  | <b>CENPV</b>     | centromere protein V                                                | 201161 |
|  |  | <b>FUCA1</b>     | fucosidase, alpha-L- 1, tissue                                      | 2517   |
|  |  | <b>TMEM98</b>    | transmembrane protein 98                                            | 26022  |
|  |  | <b>STOX1</b>     | storkhead box 1                                                     | 219736 |
|  |  | <b>ZNF22</b>     | zinc finger protein 22 (KOX 15)                                     | 7570   |
|  |  | <b>LHX2</b>      | LIM homeobox 2                                                      | 9355   |
|  |  | <b>CCDC3</b>     | coiled-coil domain containing 3                                     | 83643  |
|  |  | <b>TUBA1A</b>    | tubulin, alpha 1a                                                   | 7846   |
|  |  | <b>PDE5A</b>     | phosphodiesterase 5A, cGMP-specific                                 | 8654   |
|  |  | <b>TM7SF2</b>    | transmembrane 7 superfamily member 2                                | 7108   |
|  |  | <b>PTCHD1</b>    | patched domain containing 1                                         | 139411 |
|  |  | <b>AKR1C1</b>    | aldo-keto reductase family 1, member C1 (dihydrodiol dehydrogenase) | 1645   |
|  |  | <b>ZNF323</b>    | zinc finger protein 323                                             | 64288  |
|  |  | <b>PC</b>        | pyruvate carboxylase                                                | 5091   |
|  |  | <b>IMPA2</b>     | inositol(myo)-1(or 4)-monophosphatase 2                             | 3613   |
|  |  | <b>KGFLP1</b>    | keratinocyte growth factor-like protein 1                           | 387628 |
|  |  | <b>KGFLP1</b>    | keratinocyte growth factor-like protein 1                           | 387628 |
|  |  | <b>KGFLP1</b>    | keratinocyte growth factor-like protein 1                           | 387628 |
|  |  | <b>LOC349196</b> | hypothetical LOC349196                                              | 349196 |
|  |  | <b>LOC349196</b> | hypothetical LOC349196                                              | 349196 |
|  |  | <b>ZNF32</b>     | zinc finger protein 32                                              | 7580   |
|  |  | <b>WIPI1</b>     | WD repeat domain, phosphoinositide interacting 1                    | 55062  |
|  |  | <b>TOX2</b>      | TOX high mobility group box family member 2                         | 84969  |
|  |  | <b>ZNF711</b>    | zinc finger protein 711                                             | 7552   |
|  |  | <b>PPM1L</b>     | protein phosphatase 1 (formerly 2C)-like                            | 151742 |
|  |  | <b>PIPOX</b>     | pipecolic acid oxidase                                              | 51268  |
|  |  | <b>NAP1L2</b>    | nucleosome assembly protein 1-like 2                                | 4674   |
|  |  | <b>LPHN1</b>     | latrophilin 1                                                       | 22859  |
|  |  | <b>ARL4C</b>     | ADP-ribosylation factor-like 4C                                     | 10123  |
|  |  | <b>CXCR4</b>     | chemokine (C-X-C motif) receptor 4                                  | 7852   |
|  |  | <b>PLCB4</b>     | phospholipase C, beta 4                                             | 5332   |
|  |  | <b>MVD</b>       | mevalonate (diphospho) decarboxylase                                | 4597   |
|  |  | <b>EML1</b>      | echinoderm microtubule associated protein like 1                    | 2009   |
|  |  | <b>ARG2</b>      | arginase, type II                                                   | 384    |
|  |  | <b>CELSR3</b>    | cadherin, EGF LAG seven-pass G-type receptor 3 (flamingo)           | 1951   |

|  |  |                  |                                                          |        |
|--|--|------------------|----------------------------------------------------------|--------|
|  |  | <b>PPP4R4</b>    | protein phosphatase 4, regulatory subunit 4              | 57718  |
|  |  | <b>KCNK2</b>     | potassium channel, subfamily K, member 2                 | 3776   |
|  |  | <b>CDKN3</b>     | cyclin-dependent kinase inhibitor 3                      | 1033   |
|  |  | <b>TGFB2</b>     | transforming growth factor, beta 2                       | 7042   |
|  |  | <b>BLMH</b>      | bleomycin hydrolase                                      | 642    |
|  |  | <b>ZFPM2</b>     | zinc finger protein, multitype 2                         | 23414  |
|  |  | <b>PYCR1</b>     | pyrroline-5-carboxylate reductase 1                      | 5831   |
|  |  | <b>C1orf161</b>  | chromosome 1 open reading frame 161                      | 126868 |
|  |  | <b>LOC349196</b> | hypothetical LOC349196                                   | 349196 |
|  |  | <b>LOC349196</b> | hypothetical LOC349196                                   | 349196 |
|  |  | <b>LOC349196</b> | hypothetical LOC349196                                   | 349196 |
|  |  | <b>LOC349196</b> | hypothetical LOC349196                                   | 349196 |
|  |  | <b>LOC349196</b> | hypothetical LOC349196                                   | 349196 |
|  |  | <b>LOC349196</b> | hypothetical LOC349196                                   | 349196 |
|  |  | <b>LOC349196</b> | hypothetical LOC349196                                   | 349196 |
|  |  | <b>LOC349196</b> | hypothetical LOC349196                                   | 349196 |
|  |  | <b>LOC349196</b> | hypothetical LOC349196                                   | 349196 |
|  |  | <b>LOC349196</b> | hypothetical LOC349196                                   | 349196 |
|  |  | <b>LOC349196</b> | hypothetical LOC349196                                   | 349196 |
|  |  | <b>ZFX</b>       | zinc finger protein, X-linked                            | 7543   |
|  |  | <b>FAM83D</b>    | family with sequence similarity 83, member D             | 81610  |
|  |  | <b>BMP7</b>      | bone morphogenetic protein 7                             | 655    |
|  |  | <b>PFN2</b>      | profilin 2                                               | 5217   |
|  |  | <b>SIDT2</b>     | SID1 transmembrane family, member 2                      | 51092  |
|  |  | <b>TMEM56</b>    | transmembrane protein 56                                 | 148534 |
|  |  | <b>AASS</b>      | aminoadipate-semialdehyde synthase                       | 10157  |
|  |  | <b>STEAP2</b>    | six transmembrane epithelial antigen of the prostate 2   | 261729 |
|  |  | <b>C21orf91</b>  | chromosome 21 open reading frame 91                      | 54149  |
|  |  | <b>GDAP1</b>     | ganglioside-induced differentiation-associated protein 1 | 54332  |
|  |  | <b>DDAH1</b>     | dimethylarginine dimethylaminohydrolase 1                | 23576  |
|  |  | <b>C3orf57</b>   | chromosome 3 open reading frame 57                       | 165679 |
|  |  | <b>GLRX5</b>     | glutaredoxin 5                                           | 51218  |
|  |  | <b>LONRF1</b>    | LON peptidase N-terminal domain and ring finger 1        | 91694  |
|  |  | <b>KRT6A</b>     | keratin 6A                                               | 3853   |
|  |  | <b>FGFR1</b>     | fibroblast growth factor receptor 1                      | 2260   |
|  |  | <b>LTBP1</b>     | latent transforming growth factor beta binding protein 1 | 4052   |
|  |  | <b>GRK5</b>      | G protein-coupled receptor kinase 5                      | 2869   |
|  |  | <b>IL33</b>      | interleukin 33                                           | 90865  |
|  |  | <b>LOC349196</b> | hypothetical LOC349196                                   | 349196 |
|  |  | <b>LOC349196</b> | hypothetical LOC349196                                   | 349196 |
|  |  | <b>BARX2</b>     | BARX homeobox 2                                          | 8538   |
|  |  | <b>HIST1H4B</b>  | histone cluster 1, H4b                                   | 8366   |

|  |  |                  |                                                            |        |
|--|--|------------------|------------------------------------------------------------|--------|
|  |  | <b>ADD2</b>      | adducin 2 (beta)                                           | 119    |
|  |  | <b>DDHD1</b>     | DDHD domain containing 1                                   | 80821  |
|  |  | <b>LSS</b>       | lanosterol synthase (2,3-oxidosqualene-lanosterol cyclase) | 4047   |
|  |  | <b>C21orf119</b> | chromosome 21 open reading frame 119                       | 84996  |
|  |  | <b>SDK2</b>      | sidekick homolog 2 (chicken)                               | 54549  |
|  |  | <b>RARB</b>      | retinoic acid receptor, beta                               | 5915   |
|  |  | <b>PSD3</b>      | pleckstrin and Sec7 domain containing 3                    | 23362  |
|  |  | <b>C7orf68</b>   | chromosome 7 open reading frame 68                         | 29923  |
|  |  | <b>ATP2C2</b>    | ATPase, Ca <sup>++</sup> transporting, type 2C, member 2   | 9914   |
|  |  | <b>LMO4</b>      | LIM domain only 4                                          | 8543   |
|  |  | <b>TUB</b>       | tubby homolog (mouse)                                      | 7275   |
|  |  | <b>BBOX1</b>     | butyrobetaine (gamma), 2-oxoglutarate dioxygenase (gam     | 8424   |
|  |  | <b>HOXD11</b>    | homeobox D11                                               | 3237   |
|  |  | <b>LOC349196</b> | hypothetical LOC349196                                     | 349196 |
|  |  | <b>CYB5R2</b>    | cytochrome b5 reductase 2                                  | 51700  |
|  |  | <b>C14orf126</b> | chromosome 14 open reading frame 126                       | 112487 |
|  |  | <b>DCXR</b>      | dicarbonyl/L-xylulose reductase                            | 51181  |
|  |  | <b>DOCK11</b>    | dedicator of cytokinesis 11                                | 139818 |
|  |  | <b>L3MBTL4</b>   | l(3)mbt-like 4 (Drosophila)                                | 91133  |
|  |  | <b>LOC349196</b> | hypothetical LOC349196                                     | 349196 |
|  |  | <b>SPARCL1</b>   | SPARC-like 1 (hevin)                                       | 8404   |
|  |  | <b>FAM182A</b>   | family with sequence similarity 182, member A              | 284800 |
|  |  | <b>MAGED4</b>    | melanoma antigen family D, 4                               | 728239 |
|  |  | <b>MAGED4</b>    | melanoma antigen family D, 4                               | 728239 |
|  |  | <b>CDON</b>      | Cdon homolog (mouse)                                       | 50937  |
|  |  | <b>MCCC1</b>     | methylcrotonoyl-Coenzyme A carboxylase 1 (alpha)           | 56922  |
|  |  | <b>PCYT2</b>     | phosphate cytidyltransferase 2, ethanolamine               | 5833   |
|  |  | <b>LRP3</b>      | low density lipoprotein receptor-related protein 3         | 4037   |
|  |  | <b>CUTC</b>      | cutC copper transporter homolog (E. coli)                  | 51076  |
|  |  | <b>SYNGR1</b>    | synaptogyrin 1                                             | 9145   |
|  |  | <b>MAF</b>       | v-maf musculoaponeurotic fibrosarcoma oncogene homol       | 4094   |
|  |  | <b>EPHX2</b>     | epoxide hydrolase 2, cytoplasmic                           | 2053   |
|  |  | <b>SLC25A33</b>  | solute carrier family 25, member 33                        | 84275  |
|  |  | <b>PDK1</b>      | pyruvate dehydrogenase kinase, isozyme 1                   | 5163   |
|  |  | <b>MCF2L</b>     | MCF.2 cell line derived transforming sequence-like         | 23263  |
|  |  | <b>MAP1B</b>     | microtubule-associated protein 1B                          | 4131   |
|  |  | <b>GALNT1</b>    | UDP-N-acetyl-alpha-D-galactosamine:polypeptide N-acety     | 2589   |
|  |  | <b>KGFLP1</b>    | keratinocyte growth factor-like protein 1                  | 387628 |
|  |  | <b>EPHB6</b>     | EPH receptor B6                                            | 2051   |
|  |  | <b>LOC349196</b> | hypothetical LOC349196                                     | 349196 |
|  |  | <b>LOC349196</b> | hypothetical LOC349196                                     | 349196 |

|  |  |                  |                                                              |        |
|--|--|------------------|--------------------------------------------------------------|--------|
|  |  | <b>C7orf13</b>   | chromosome 7 open reading frame 13                           | 129790 |
|  |  | <b>FAM182A</b>   | family with sequence similarity 182, member A                | 284800 |
|  |  | <b>FRMD6</b>     | FERM domain containing 6                                     | 122786 |
|  |  | <b>CHRM3</b>     | cholinergic receptor, muscarinic 3                           | 1131   |
|  |  | <b>TP53AIP1</b>  | tumor protein p53 regulated apoptosis inducing protein 1     | 63970  |
|  |  | <b>IGFBP2</b>    | insulin-like growth factor binding protein 2, 36kDa          | 3485   |
|  |  | <b>MRPS28</b>    | mitochondrial ribosomal protein S28                          | 28957  |
|  |  | <b>TMEM97</b>    | transmembrane protein 97                                     | 27346  |
|  |  | <b>RNU5E</b>     | RNA, U5E small nuclear                                       | 26829  |
|  |  | <b>SLC6A6</b>    | solute carrier family 6 (neurotransmitter transporter, tauri | 6533   |
|  |  | <b>TCF4</b>      | transcription factor 4                                       | 6925   |
|  |  | <b>CD99</b>      | CD99 molecule                                                | 4267   |
|  |  | <b>CD99</b>      | CD99 molecule                                                | 4267   |
|  |  | <b>B3GALNT1</b>  | beta-1,3-N-acetylgalactosaminyltransferase 1 (globoside b    | 8706   |
|  |  | <b>SLC29A4</b>   | solute carrier family 29 (nucleoside transporters), member   | 222962 |
|  |  | <b>BSPRY</b>     | B-box and SPRY domain containing                             | 54836  |
|  |  | <b>BDH1</b>      | 3-hydroxybutyrate dehydrogenase, type 1                      | 622    |
|  |  | <b>ATP6V1E2</b>  | ATPase, H+ transporting, lysosomal 31kDa, V1 subunit E2      | 90423  |
|  |  | <b>TLE2</b>      | transducin-like enhancer of split 2 (E(sp1) homolog, Droso   | 7089   |
|  |  | <b>EFS</b>       | embryonal Fyn-associated substrate                           | 10278  |
|  |  | <b>CHODL</b>     | chondrolectin                                                | 140578 |
|  |  | <b>TGFB3</b>     | transforming growth factor, beta 3                           | 7043   |
|  |  | <b>DDIT4</b>     | DNA-damage-inducible transcript 4                            | 54541  |
|  |  | <b>PCYT2</b>     | phosphate cytidyltransferase 2, ethanolamine                 | 5833   |
|  |  | <b>KLHL13</b>    | kelch-like 13 (Drosophila)                                   | 90293  |
|  |  | <b>METTL3</b>    | methyltransferase like 3                                     | 56339  |
|  |  | <b>LANCL1</b>    | LanC lantibiotic synthetase component C-like 1 (bacterial)   | 10314  |
|  |  | <b>FAM171A2</b>  | family with sequence similarity 171, member A2               | 284069 |
|  |  | <b>ADA</b>       | adenosine deaminase                                          | 100    |
|  |  | <b>LOC349196</b> | hypothetical LOC349196                                       | 349196 |
|  |  | <b>LOC349196</b> | hypothetical LOC349196                                       | 349196 |
|  |  | <b>MFSD2</b>     | major facilitator superfamily domain containing 2            | 84879  |
|  |  | <b>NUBPL</b>     | nucleotide binding protein-like                              | 80224  |
|  |  | <b>ULBP1</b>     | UL16 binding protein 1                                       | 80329  |
|  |  | <b>ACSS1</b>     | acyl-CoA synthetase short-chain family member 1              | 84532  |
|  |  | <b>FAM173B</b>   | family with sequence similarity 173, member B                | 134145 |
|  |  | <b>DNER</b>      | delta/notch-like EGF repeat containing                       | 92737  |
|  |  | <b>DHX35</b>     | DEAH (Asp-Glu-Ala-His) box polypeptide 35                    | 60625  |
|  |  | <b>FDPSL2A</b>   | MGC44478                                                     | 619190 |
|  |  | <b>PPFIBP2</b>   | PTPRF interacting protein, binding protein 2 (liprin beta 2) | 8495   |
|  |  | <b>FRY</b>       | furry homolog (Drosophila)                                   | 10129  |



|  |  |                  |                                                             |           |
|--|--|------------------|-------------------------------------------------------------|-----------|
|  |  | <b>HSPC159</b>   | galectin-related protein                                    | 29094     |
|  |  | <b>ACLY</b>      | ATP citrate lyase                                           | 47        |
|  |  | <b>C11orf41</b>  | chromosome 11 open reading frame 41                         | 25758     |
|  |  | <b>ABCC4</b>     | ATP-binding cassette, sub-family C (CFTR/MRP), member 4     | 10257     |
|  |  | <b>PLEKHG4B</b>  | pleckstrin homology domain containing, family G (with Rh    | 153478    |
|  |  | <b>SLC1A4</b>    | solute carrier family 1 (glutamate/neutral amino acid trans | 6509      |
|  |  | <b>IDH1</b>      | isocitrate dehydrogenase 1 (NADP+), soluble                 | 3417      |
|  |  | <b>KIAA1549</b>  | KIAA1549                                                    | 57670     |
|  |  | <b>KLK10</b>     | kallikrein-related peptidase 10                             | 5655      |
|  |  | <b>KGFLP2</b>    | keratinocyte growth factor-like protein 2                   | 654466    |
|  |  | <b>KRT8</b>      | keratin 8                                                   | 3856      |
|  |  | <b>OSGEP</b>     | O-sialoglycoprotein endopeptidase                           | 55644     |
|  |  | <b>ADAM22</b>    | ADAM metallopeptidase domain 22                             | 53616     |
|  |  | <b>NANP</b>      | N-acetylneuraminic acid phosphatase                         | 140838    |
|  |  | <b>ZNF254</b>    | zinc finger protein 254                                     | 9534      |
|  |  | <b>ASMTL</b>     | acetylserotonin O-methyltransferase-like                    | 8623      |
|  |  | <b>ZNF287</b>    | zinc finger protein 287                                     | 57336     |
|  |  | <b>TTC28</b>     | tetratricopeptide repeat domain 28                          | 23331     |
|  |  | <b>VDAC3</b>     | voltage-dependent anion channel 3                           | 7419      |
|  |  | <b>FLRT3</b>     | fibronectin leucine rich transmembrane protein 3            | 23767     |
|  |  | <b>SLAIN1</b>    | SLAIN motif family, member 1                                | 122060    |
|  |  | <b>KIAA1467</b>  | KIAA1467                                                    | 57613     |
|  |  | <b>ATP2B1</b>    | ATPase, Ca <sup>++</sup> transporting, plasma membrane 1    | 490       |
|  |  | <b>PYGO1</b>     | pygopus homolog 1 (Drosophila)                              | 26108     |
|  |  | <b>C17orf61</b>  | chromosome 17 open reading frame 61                         | 254863    |
|  |  | <b>BRSK2</b>     | BR serine/threonine kinase 2                                | 9024      |
|  |  | <b>DHCR7</b>     | 7-dehydrocholesterol reductase                              | 1717      |
|  |  | <b>LOC349196</b> | hypothetical LOC349196                                      | 349196    |
|  |  | <b>LOC349196</b> | hypothetical LOC349196                                      | 349196    |
|  |  | <b>EPCAM</b>     | epithelial cell adhesion molecule                           | 4072      |
|  |  | <b>PNPLA4</b>    | patatin-like phospholipase domain containing 4              | 8228      |
|  |  | <b>PID1</b>      | phosphotyrosine interaction domain containing 1             | 55022     |
|  |  | <b>MGC21881</b>  | hypothetical locus MGC21881                                 | 389741    |
|  |  | <b>MGC21881</b>  | hypothetical locus MGC21881                                 | 389741    |
|  |  | <b>APPL1</b>     | adaptor protein, phosphotyrosine interaction, PH domain     | 26060     |
|  |  | <b>FZD1</b>      | frizzled homolog 1 (Drosophila)                             | 8321      |
|  |  | <b>CHIC2</b>     | cysteine-rich hydrophobic domain 2                          | 26511     |
|  |  | <b>C14orf33</b>  | chromosome 14 open reading frame 33                         | 100129075 |
|  |  | <b>LMCD1</b>     | LIM and cysteine-rich domains 1                             | 29995     |
|  |  | <b>ZNF704</b>    | zinc finger protein 704                                     | 619279    |
|  |  | <b>ASMTL</b>     | acetylserotonin O-methyltransferase-like                    | 8623      |



|  |  |                 |                                                               |        |
|--|--|-----------------|---------------------------------------------------------------|--------|
|  |  | <b>SOBP</b>     | sine oculis binding protein homolog (Drosophila)              | 55084  |
|  |  | <b>JAG1</b>     | jagged 1 (Alagille syndrome)                                  | 182    |
|  |  | <b>EPCAM</b>    | epithelial cell adhesion molecule                             | 4072   |
|  |  | <b>C20orf3</b>  | chromosome 20 open reading frame 3                            | 57136  |
|  |  | <b>PDRG1</b>    | p53 and DNA-damage regulated 1                                | 81572  |
|  |  | <b>SLC25A1</b>  | solute carrier family 25 (mitochondrial carrier; citrate tran | 6576   |
|  |  | <b>MORC4</b>    | MORC family CW-type zinc finger 4                             | 79710  |
|  |  | <b>USP13</b>    | ubiquitin specific peptidase 13 (isopeptidase T-3)            | 8975   |
|  |  | <b>TMEM123</b>  | transmembrane protein 123                                     | 114908 |
|  |  | <b>NDRG2</b>    | NDRG family member 2                                          | 57447  |
|  |  | <b>PHC1</b>     | polyhomeotic homolog 1 (Drosophila)                           | 1911   |
|  |  | <b>HEY2</b>     | hairy/enhancer-of-split related with YRPW motif 2             | 23493  |
|  |  | <b>ARSG</b>     | arylsulfatase G                                               | 22901  |
|  |  | <b>FDPSL2A</b>  | MGC44478                                                      | 619190 |
|  |  | <b>MCOLN2</b>   | mucolipin 2                                                   | 255231 |
|  |  | <b>STXBP1</b>   | syntaxin binding protein 1                                    | 6812   |
|  |  | <b>LOH3CR2A</b> | loss of heterozygosity, 3, chromosomal region 2, gene A       | 29931  |
|  |  | <b>PLS1</b>     | plastin 1 (I isoform)                                         | 5357   |
|  |  | <b>NAT5</b>     | N-acetyltransferase 5 (GCN5-related, putative)                | 51126  |
|  |  | <b>PTMS</b>     | parathymosin                                                  | 5763   |
|  |  | <b>PHC1</b>     | polyhomeotic homolog 1 (Drosophila)                           | 1911   |
|  |  | <b>KIAA0146</b> | KIAA0146                                                      | 23514  |
|  |  | <b>C22orf32</b> | chromosome 22 open reading frame 32                           | 91689  |
|  |  | <b>FLJ39632</b> | hypothetical LOC642477                                        | 642477 |
|  |  | <b>FHL1</b>     | four and a half LIM domains 1                                 | 2273   |
|  |  | <b>ACPL2</b>    | acid phosphatase-like 2                                       | 92370  |
|  |  | <b>PALLD</b>    | palladin, cytoskeletal associated protein                     | 23022  |
|  |  | <b>C14orf2</b>  | chromosome 14 open reading frame 2                            | 9556   |
|  |  | <b>CHPT1</b>    | choline phosphotransferase 1                                  | 56994  |
|  |  | <b>PDLIM2</b>   | PDZ and LIM domain 2 (mystique)                               | 64236  |
|  |  | <b>NHS</b>      | Nance-Horan syndrome (congenital cataracts and dental a       | 4810   |
|  |  | <b>NPW</b>      | neuropeptide W                                                | 283869 |
|  |  | <b>DIP2C</b>    | DIP2 disco-interacting protein 2 homolog C (Drosophila)       | 22982  |
|  |  | <b>C2orf43</b>  | chromosome 2 open reading frame 43                            | 60526  |
|  |  | <b>ATRNL1</b>   | attractin                                                     | 8455   |
|  |  | <b>DHRS4L2</b>  | dehydrogenase/reductase (SDR family) member 4 like 2          | 317749 |
|  |  | <b>MTMR4</b>    | myotubularin related protein 4                                | 9110   |
|  |  | <b>SLC25A33</b> | solute carrier family 25, member 33                           | 84275  |
|  |  | <b>MAGED1</b>   | melanoma antigen family D, 1                                  | 9500   |
|  |  | <b>TMEM63C</b>  | transmembrane protein 63C                                     | 57156  |
|  |  | <b>TST</b>      | thiosulfate sulfurtransferase (rhodanese)                     | 7263   |

|  |  |                     |                                                              |           |
|--|--|---------------------|--------------------------------------------------------------|-----------|
|  |  | <b>RHBDL3</b>       | rhomboid, veinlet-like 3 (Drosophila)                        | 162494    |
|  |  | <b>LIMCH1</b>       | LIM and calponin homology domains 1                          | 22998     |
|  |  | <b>TMEM66</b>       | transmembrane protein 66                                     | 51669     |
|  |  | <b>FGFR4</b>        | fibroblast growth factor receptor 4                          | 2264      |
|  |  | <b>BACH2</b>        | BTB and CNC homology 1, basic leucine zipper transcriptio    | 60468     |
|  |  | <b>TSPAN9</b>       | tetraspanin 9                                                | 10867     |
|  |  | <b>LOC100129484</b> | hypothetical LOC100129484                                    | 100129484 |
|  |  | <b>C14orf1</b>      | chromosome 14 open reading frame 1                           | 11161     |
|  |  | <b>ABCA12</b>       | ATP-binding cassette, sub-family A (ABC1), member 12         | 26154     |
|  |  | <b>ENTPD6</b>       | ectonucleoside triphosphate diphosphohydrolase 6 (putat      | 955       |
|  |  | <b>ATP9A</b>        | ATPase, class II, type 9A                                    | 10079     |
|  |  | <b>NBPF3</b>        | neuroblastoma breakpoint family, member 3                    | 84224     |
|  |  | <b>CHST7</b>        | carbohydrate (N-acetylglucosamine 6-O) sulfotransferase      | 56548     |
|  |  | <b>TOX3</b>         | TOX high mobility group box family member 3                  | 27324     |
|  |  | <b>SLC6A8</b>       | solute carrier family 6 (neurotransmitter transporter, creat | 6535      |
|  |  | <b>DHCR24</b>       | 24-dehydrocholesterol reductase                              | 1718      |
|  |  | <b>FAM162A</b>      | family with sequence similarity 162, member A                | 26355     |
|  |  | <b>PROSC</b>        | proline synthetase co-transcribed homolog (bacterial)        | 11212     |
|  |  | <b>GLT25D2</b>      | glycosyltransferase 25 domain containing 2                   | 23127     |
|  |  | <b>MYOM2</b>        | myomesin (M-protein) 2, 165kDa                               | 9172      |
|  |  | <b>DMRT1</b>        | doublesex and mab-3 related transcription factor 1           | 1761      |
|  |  | <b>COX6C</b>        | cytochrome c oxidase subunit VIc                             | 1345      |
|  |  | <b>ZNRF1</b>        | zinc and ring finger 1                                       | 84937     |
|  |  | <b>PELI2</b>        | pellino homolog 2 (Drosophila)                               | 57161     |
|  |  | <b>SMOX</b>         | spermine oxidase                                             | 54498     |
|  |  | <b>KRT13</b>        | keratin 13                                                   | 3860      |
|  |  | <b>MAPK12</b>       | mitogen-activated protein kinase 12                          | 6300      |
|  |  | <b>C1orf115</b>     | chromosome 1 open reading frame 115                          | 79762     |
|  |  | <b>UNC84B</b>       | unc-84 homolog B (C. elegans)                                | 25777     |
|  |  | <b>SLIT3</b>        | slit homolog 3 (Drosophila)                                  | 6586      |
|  |  | <b>HAUS4</b>        | HAUS augmin-like complex, subunit 4                          | 54930     |
|  |  | <b>CLGN</b>         | calmegin                                                     | 1047      |
|  |  | <b>SMTN</b>         | smoothelin                                                   | 6525      |
|  |  | <b>TRIM24</b>       | tripartite motif-containing 24                               | 8805      |
|  |  | <b>LOC84856</b>     | hypothetical LOC84856                                        | 84856     |
|  |  | <b>SLC6A8</b>       | solute carrier family 6 (neurotransmitter transporter, creat | 6535      |
|  |  | <b>MFHAS1</b>       | malignant fibrous histiocytoma amplified sequence 1          | 9258      |
|  |  | <b>C21orf56</b>     | chromosome 21 open reading frame 56                          | 84221     |
|  |  | <b>C14orf162</b>    | chromosome 14 open reading frame 162                         | 56936     |
|  |  | <b>CYP51A1</b>      | cytochrome P450, family 51, subfamily A, polypeptide 1       | 1595      |
|  |  | <b>POMT1</b>        | protein-O-mannosyltransferase 1                              | 10585     |

|  |  |                    |                                                             |           |
|--|--|--------------------|-------------------------------------------------------------|-----------|
|  |  | <b>EDN2</b>        | endothelin 2                                                | 1907      |
|  |  | <b>FDPS</b>        | farnesyl diphosphate synthase (farnesyl pyrophosphate sy    | 2224      |
|  |  | <b>PECI</b>        | peroxisomal D3,D2-enoyl-CoA isomerase                       | 10455     |
|  |  | <b>HRSP12</b>      | heat-responsive protein 12                                  | 10247     |
|  |  | <b>HSD17B8</b>     | hydroxysteroid (17-beta) dehydrogenase 8                    | 7923      |
|  |  | <b>HSD17B8</b>     | hydroxysteroid (17-beta) dehydrogenase 8                    | 7923      |
|  |  | <b>HSD17B8</b>     | hydroxysteroid (17-beta) dehydrogenase 8                    | 7923      |
|  |  | <b>FBXO15</b>      | F-box protein 15                                            | 201456    |
|  |  | <b>RNF157</b>      | ring finger protein 157                                     | 114804    |
|  |  | <b>CCL26</b>       | chemokine (C-C motif) ligand 26                             | 10344     |
|  |  | <b>SNORD116-14</b> | small nucleolar RNA, C/D box 116-14                         | 100033426 |
|  |  | <b>MAGI1</b>       | membrane associated guanylate kinase, WW and PDZ dom        | 9223      |
|  |  | <b>SRrp35</b>      | serine-arginine repressor protein (35 kDa)                  | 135295    |
|  |  | <b>ALOX15</b>      | arachidonate 15-lipoxygenase                                | 246       |
|  |  | <b>ALDH5A1</b>     | aldehyde dehydrogenase 5 family, member A1                  | 7915      |
|  |  | <b>TSPAN6</b>      | tetraspanin 6                                               | 7105      |
|  |  | <b>C22orf40</b>    | chromosome 22 open reading frame 40                         | 150383    |
|  |  | <b>MGC21881</b>    | hypothetical locus MGC21881                                 | 389741    |
|  |  | <b>RNF24</b>       | ring finger protein 24                                      | 11237     |
|  |  | <b>KTN1</b>        | kinectin 1 (kinesin receptor)                               | 3895      |
|  |  | <b>HMGB3</b>       | high-mobility group box 3                                   | 3149      |
|  |  | <b>HOXD10</b>      | homeobox D10                                                | 3236      |
|  |  | <b>KIAA0323</b>    | KIAA0323                                                    | 23351     |
|  |  | <b>SIP1</b>        | survival of motor neuron protein interacting protein 1      | 8487      |
|  |  | <b>SLC30A10</b>    | solute carrier family 30, member 10                         | 55532     |
|  |  | <b>ATG10</b>       | ATG10 autophagy related 10 homolog ( <i>S. cerevisiae</i> ) | 83734     |
|  |  | <b>H2AFY2</b>      | H2A histone family, member Y2                               | 55506     |
|  |  | <b>NCRNA00173</b>  | non-protein coding RNA 173                                  | 100287569 |
|  |  | <b>MDP1</b>        | magnesium-dependent phosphatase 1                           | 145553    |
|  |  | <b>CYFIP2</b>      | cytoplasmic FMR1 interacting protein 2                      | 26999     |
|  |  | <b>TTC9</b>        | tetratricopeptide repeat domain 9                           | 23508     |
|  |  | <b>NME4</b>        | non-metastatic cells 4, protein expressed in                | 4833      |
|  |  | <b>SLC29A2</b>     | solute carrier family 29 (nucleoside transporters), member  | 3177      |
|  |  | <b>NEK9</b>        | NIMA (never in mitosis gene a)- related kinase 9            | 91754     |
|  |  | <b>PHKA1</b>       | phosphorylase kinase, alpha 1 (muscle)                      | 5255      |
|  |  | <b>MRPL12</b>      | mitochondrial ribosomal protein L12                         | 6182      |
|  |  | <b>SC4MOL</b>      | sterol-C4-methyl oxidase-like                               | 6307      |
|  |  | <b>DPF1</b>        | D4, zinc and double PHD fingers family 1                    | 8193      |
|  |  | <b>NT5C3L</b>      | 5'-nucleotidase, cytosolic III-like                         | 115024    |
|  |  | <b>CPOX</b>        | coproporphyrinogen oxidase                                  | 1371      |
|  |  | <b>NINL</b>        | ninein-like                                                 | 22981     |

|  |  |                  |                                                              |        |
|--|--|------------------|--------------------------------------------------------------|--------|
|  |  | <b>BBS2</b>      | Bardet-Biedl syndrome 2                                      | 583    |
|  |  | <b>FOXF2</b>     | forkhead box F2                                              | 2295   |
|  |  | <b>MEST</b>      | mesoderm specific transcript homolog (mouse)                 | 4232   |
|  |  | <b>SHOX2</b>     | short stature homeobox 2                                     | 6474   |
|  |  | <b>LSP1</b>      | lymphocyte-specific protein 1                                | 4046   |
|  |  | <b>ANGEL1</b>    | angel homolog 1 (Drosophila)                                 | 23357  |
|  |  | <b>DACH1</b>     | dachshund homolog 1 (Drosophila)                             | 1602   |
|  |  | <b>LYPD6</b>     | LY6/PLAUR domain containing 6                                | 130574 |
|  |  | <b>ABHD4</b>     | abhydrolase domain containing 4                              | 63874  |
|  |  | <b>NDUFA4L2</b>  | NADH dehydrogenase (ubiquinone) 1 alpha subcomplex, 4        | 56901  |
|  |  | <b>AHCY</b>      | adenosylhomocysteinase                                       | 191    |
|  |  | <b>HIPK2</b>     | homeodomain interacting protein kinase 2                     | 28996  |
|  |  | <b>ASRGL1</b>    | asparaginase like 1                                          | 80150  |
|  |  | <b>FAM46B</b>    | family with sequence similarity 46, member B                 | 115572 |
|  |  | <b>FARP1</b>     | FERM, RhoGEF (ARHGEF) and pleckstrin domain protein 1        | 10160  |
|  |  | <b>ZNF395</b>    | zinc finger protein 395                                      | 55893  |
|  |  | <b>GRB14</b>     | growth factor receptor-bound protein 14                      | 2888   |
|  |  | <b>HSP90AA4P</b> | heat shock protein 90kDa alpha (cytosolic), class A member   | 3323   |
|  |  | <b>AHA1</b>      | AHA1, activator of heat shock 90kDa protein ATPase homolo    | 10598  |
|  |  | <b>HOXD8</b>     | homeobox D8                                                  | 3234   |
|  |  | <b>IMPDH2</b>    | IMP (inosine monophosphate) dehydrogenase 2                  | 3615   |
|  |  | <b>ZNF771</b>    | zinc finger protein 771                                      | 51333  |
|  |  | <b>EBF4</b>      | early B-cell factor 4                                        | 57593  |
|  |  | <b>GSTZ1</b>     | glutathione transferase zeta 1                               | 2954   |
|  |  | <b>ZDHHC2</b>    | zinc finger, DHHC-type containing 2                          | 51201  |
|  |  | <b>SRD5A3</b>    | steroid 5 alpha-reductase 3                                  | 79644  |
|  |  | <b>ACSS2</b>     | acyl-CoA synthetase short-chain family member 2              | 55902  |
|  |  | <b>HADH</b>      | hydroxyacyl-Coenzyme A dehydrogenase                         | 3033   |
|  |  | <b>RPS29</b>     | ribosomal protein S29                                        | 6235   |
|  |  | <b>GTF2A1</b>    | general transcription factor IIA, 1, 19/37kDa                | 2957   |
|  |  | <b>TRAK1</b>     | trafficking protein, kinesin binding 1                       | 22906  |
|  |  | <b>FZD8</b>      | frizzled homolog 8 (Drosophila)                              | 8325   |
|  |  | <b>CEP68</b>     | centrosomal protein 68kDa                                    | 23177  |
|  |  | <b>KLRG2</b>     | killer cell lectin-like receptor subfamily G, member 2       | 346689 |
|  |  | <b>MRPS26</b>    | mitochondrial ribosomal protein S26                          | 64949  |
|  |  | <b>CYP51A1</b>   | cytochrome P450, family 51, subfamily A, polypeptide 1       | 1595   |
|  |  | <b>USP17L6P</b>  | ubiquitin specific peptidase 17-like 6 (pseudogene)          | 391622 |
|  |  | <b>MGC21881</b>  | hypothetical locus MGC21881                                  | 389741 |
|  |  | <b>PRKDC</b>     | protein kinase, DNA-activated, catalytic polypeptide         | 5591   |
|  |  | <b>CASK</b>      | calcium/calmodulin-dependent serine protein kinase (MA       | 8573   |
|  |  | <b>SLC25A10</b>  | solute carrier family 25 (mitochondrial carrier; dicarboxyla | 1468   |

|  |  |                  |                                                                      |           |
|--|--|------------------|----------------------------------------------------------------------|-----------|
|  |  | <b>FDXR</b>      | ferredoxin reductase                                                 | 2232      |
|  |  | <b>LY6K</b>      | lymphocyte antigen 6 complex, locus K                                | 54742     |
|  |  | <b>ARHGAP19</b>  | Rho GTPase activating protein 19                                     | 84986     |
|  |  | <b>ACCN2</b>     | amiloride-sensitive cation channel 2, neuronal                       | 41        |
|  |  | <b>FITM2</b>     | fat storage-inducing transmembrane protein 2                         | 128486    |
|  |  | <b>TDP1</b>      | tyrosyl-DNA phosphodiesterase 1                                      | 55775     |
|  |  | <b>RCN3</b>      | reticulocalbin 3, EF-hand calcium binding domain                     | 57333     |
|  |  | <b>SNX5</b>      | sorting nexin 5                                                      | 27131     |
|  |  | <b>FGGY</b>      | FGGY carbohydrate kinase domain containing                           | 55277     |
|  |  | <b>PCSK5</b>     | proprotein convertase subtilisin/kexin type 5                        | 5125      |
|  |  | <b>CECR5</b>     | cat eye syndrome chromosome region, candidate 5                      | 27440     |
|  |  | <b>FABP5</b>     | fatty acid binding protein 5 (psoriasis-associated)                  | 2171      |
|  |  | <b>BPHL</b>      | biphenyl hydrolase-like (serine hydrolase)                           | 670       |
|  |  | <b>FAM64A</b>    | family with sequence similarity 64, member A                         | 54478     |
|  |  | <b>NSDHL</b>     | NAD(P) dependent steroid dehydrogenase-like                          | 50814     |
|  |  | <b>NUDT14</b>    | nudix (nucleoside diphosphate linked moiety X)-type motif 14         | 256281    |
|  |  | <b>CMTM8</b>     | CKLF-like MARVEL transmembrane domain containing 8                   | 152189    |
|  |  | <b>C17orf96</b>  | chromosome 17 open reading frame 96                                  | 100170841 |
|  |  | <b>FABP5</b>     | fatty acid binding protein 5 (psoriasis-associated)                  | 2171      |
|  |  | <b>KIAA2022</b>  | KIAA2022                                                             | 340533    |
|  |  | <b>EPM2AIP1</b>  | EPM2A (laforin) interacting protein 1                                | 9852      |
|  |  | <b>FOXE1</b>     | forkhead box E1 (thyroid transcription factor 2)                     | 2304      |
|  |  | <b>TBC1D4</b>    | TBC1 domain family, member 4                                         | 9882      |
|  |  | <b>HEBP1</b>     | heme binding protein 1                                               | 50865     |
|  |  | <b>C2CD2</b>     | C2 calcium-dependent domain containing 2                             | 25966     |
|  |  | <b>HECW2</b>     | HECT, C2 and WW domain containing E3 ubiquitin protein ligase 2      | 57520     |
|  |  | <b>SEC14L1</b>   | SEC14-like 1 ( <i>S. cerevisiae</i> )                                | 6397      |
|  |  | <b>CADM4</b>     | cell adhesion molecule 4                                             | 199731    |
|  |  | <b>NUP210</b>    | nucleoporin 210kDa                                                   | 23225     |
|  |  | <b>RNF150</b>    | ring finger protein 150                                              | 57484     |
|  |  | <b>SLC16A5</b>   | solute carrier family 16, member 5 (monocarboxylic acid transporter) | 9121      |
|  |  | <b>OSGIN1</b>    | oxidative stress induced growth inhibitor 1                          | 29948     |
|  |  | <b>SIRPA</b>     | signal-regulatory protein alpha                                      | 140885    |
|  |  | <b>H2AFZ</b>     | H2A histone family, member Z                                         | 3015      |
|  |  | <b>FAM136B</b>   | family with sequence similarity 136, member B                        | 387071    |
|  |  | <b>SPR</b>       | sepiapterin reductase (7,8-dihydrobiopterin:NADP+ oxidoreductase)    | 6697      |
|  |  | <b>C8orf58</b>   | chromosome 8 open reading frame 58                                   | 541565    |
|  |  | <b>TBX3</b>      | T-box 3                                                              | 6926      |
|  |  | <b>HIST2H2AB</b> | histone cluster 2, H2ab                                              | 317772    |
|  |  | <b>HS3ST3B1</b>  | heparan sulfate (glucosamine) 3-O-sulfotransferase 3B1               | 9953      |
|  |  | <b>BCAT2</b>     | branched chain aminotransferase 2, mitochondrial                     | 587       |

|  |  |                  |                                                            |        |
|--|--|------------------|------------------------------------------------------------|--------|
|  |  | <b>SNORA71A</b>  | small nucleolar RNA, H/ACA box 71A                         | 26777  |
|  |  | <b>FAM27A</b>    | family with sequence similarity 27, member A               | 548321 |
|  |  | <b>ECE1</b>      | endothelin converting enzyme 1                             | 1889   |
|  |  | <b>TBL1XR1</b>   | transducin (beta)-like 1 X-linked receptor 1               | 79718  |
|  |  | <b>NUDT11</b>    | nudix (nucleoside diphosphate linked moiety X)-type moti   | 55190  |
|  |  | <b>INHBB</b>     | inhibin, beta B                                            | 3625   |
|  |  | <b>FOXRED2</b>   | FAD-dependent oxidoreductase domain containing 2           | 80020  |
|  |  | <b>GALNTL4</b>   | UDP-N-acetyl-alpha-D-galactosamine:polypeptide N-acety     | 374378 |
|  |  | <b>TH1L</b>      | TH1-like (Drosophila)                                      | 51497  |
|  |  | <b>TTC5</b>      | tetratricopeptide repeat domain 5                          | 91875  |
|  |  | <b>FAM127B</b>   | family with sequence similarity 127, member B              | 26071  |
|  |  | <b>ZNF334</b>    | zinc finger protein 334                                    | 55713  |
|  |  | <b>RPS3A</b>     | ribosomal protein S3A                                      | 6189   |
|  |  | <b>INTS2</b>     | integrator complex subunit 2                               | 57508  |
|  |  | <b>NSUN7</b>     | NOL1/NOP2/Sun domain family, member 7                      | 79730  |
|  |  | <b>TNFRSF10D</b> | tumor necrosis factor receptor superfamily, member 10d,    | 8793   |
|  |  | <b>LOC152217</b> | hypothetical LOC152217                                     | 152217 |
|  |  | <b>TBCD</b>      | tubulin folding cofactor D                                 | 6904   |
|  |  | <b>TWIST2</b>    | twist homolog 2 (Drosophila)                               | 117581 |
|  |  | <b>IL17RD</b>    | interleukin 17 receptor D                                  | 54756  |
|  |  | <b>FAM27A</b>    | family with sequence similarity 27, member A               | 548321 |
|  |  | <b>TCTEX1D2</b>  | Tctex1 domain containing 2                                 | 255758 |
|  |  | <b>THOC4</b>     | THO complex 4                                              | 10189  |
|  |  | <b>NUDT8</b>     | nudix (nucleoside diphosphate linked moiety X)-type moti   | 254552 |
|  |  | <b>ProSAPiP1</b> | ProSAPiP1 protein                                          | 9762   |
|  |  | <b>SNRPB</b>     | small nuclear ribonucleoprotein polypeptides B and B1      | 6628   |
|  |  | <b>ABCC2</b>     | ATP-binding cassette, sub-family C (CFTR/MRP), member 2    | 1244   |
|  |  | <b>RAB40B</b>    | RAB40B, member RAS oncogene family                         | 10966  |
|  |  | <b>PIGU</b>      | phosphatidylinositol glycan anchor biosynthesis, class U   | 128869 |
|  |  | <b>C11orf75</b>  | chromosome 11 open reading frame 75                        | 56935  |
|  |  | <b>SLC39A11</b>  | solute carrier family 39 (metal ion transporter), member 1 | 201266 |
|  |  | <b>GLRB</b>      | glycine receptor, beta                                     | 2743   |
|  |  | <b>MLC1</b>      | megalencephalic leukoencephalopathy with subcortical cy    | 23209  |
|  |  | <b>PRPSAP1</b>   | phosphoribosyl pyrophosphate synthetase-associated pro     | 5635   |
|  |  | <b>CMTM4</b>     | CKLF-like MARVEL transmembrane domain containing 4         | 146223 |
|  |  | <b>CHCHD10</b>   | coiled-coil-helix-coiled-coil-helix domain containing 10   | 400916 |
|  |  | <b>TTC7B</b>     | tetratricopeptide repeat domain 7B                         | 145567 |
|  |  | <b>ATP5G1</b>    | ATP synthase, H+ transporting, mitochondrial F0 complex,   | 516    |
|  |  | <b>KCNGB3</b>    | potassium voltage-gated channel, subfamily G, member 3     | 170850 |
|  |  | <b>DHRS4</b>     | dehydrogenase/reductase (SDR family) member 4              | 10901  |
|  |  | <b>RIMBP2</b>    | RIMS binding protein 2                                     | 23504  |

|  |  |                  |                                                              |        |
|--|--|------------------|--------------------------------------------------------------|--------|
|  |  | <b>ZNF518B</b>   | zinc finger protein 518B                                     | 85460  |
|  |  | <b>ABHD10</b>    | abhydrolase domain containing 10                             | 55347  |
|  |  | <b>MTA1</b>      | metastasis associated 1                                      | 9112   |
|  |  | <b>CNIH</b>      | cornichon homolog (Drosophila)                               | 10175  |
|  |  | <b>SH3KBP1</b>   | SH3-domain kinase binding protein 1                          | 30011  |
|  |  | <b>LEPREL2</b>   | leprecan-like 2                                              | 10536  |
|  |  | <b>GPSM2</b>     | G-protein signaling modulator 2 (AGS3-like, C. elegans)      | 29899  |
|  |  | <b>FGF2</b>      | fibroblast growth factor 2 (basic)                           | 2247   |
|  |  | <b>PLXND1</b>    | plexin D1                                                    | 23129  |
|  |  | <b>SNORD57</b>   | small nucleolar RNA, C/D box 57                              | 26792  |
|  |  | <b>HSP90AA2</b>  | heat shock protein 90kDa alpha (cytosolic), class A member   | 3324   |
|  |  | <b>NUDT7</b>     | nudix (nucleoside diphosphate linked moiety X)-type motif    | 283927 |
|  |  | <b>NR2E1</b>     | nuclear receptor subfamily 2, group E, member 1              | 7101   |
|  |  | <b>FBXO41</b>    | F-box protein 41                                             | 150726 |
|  |  | <b>TSPAN33</b>   | tetraspanin 33                                               | 340348 |
|  |  | <b>TKT</b>       | transketolase                                                | 7086   |
|  |  | <b>KRTCAP3</b>   | keratinocyte associated protein 3                            | 200634 |
|  |  | <b>FAM60A</b>    | family with sequence similarity 60, member A                 | 58516  |
|  |  | <b>PRRX2</b>     | paired related homeobox 2                                    | 51450  |
|  |  | <b>MNAT1</b>     | menage a trois homolog 1, cyclin H assembly factor (Xenopus) | 4331   |
|  |  | <b>PAK1</b>      | p21 protein (Cdc42/Rac)-activated kinase 1                   | 5058   |
|  |  | <b>SEMA4F</b>    | sema domain, immunoglobulin domain (Ig), transmembrane       | 10505  |
|  |  | <b>TBC1D5</b>    | TBC1 domain family, member 5                                 | 9779   |
|  |  | <b>NXPH4</b>     | neurexophilin 4                                              | 11247  |
|  |  | <b>FREQ</b>      | frequenin homolog (Drosophila)                               | 23413  |
|  |  | <b>DLST</b>      | dihydrolipoamide S-succinyltransferase (E2 component of      | 1743   |
|  |  | <b>CYTSA</b>     | cytospin A                                                   | 23384  |
|  |  | <b>C9orf46</b>   | chromosome 9 open reading frame 46                           | 55848  |
|  |  | <b>CLCN2</b>     | chloride channel 2                                           | 1181   |
|  |  | <b>USP5</b>      | ubiquitin specific peptidase 5 (isopeptidase T)              | 8078   |
|  |  | <b>NEK6</b>      | NIMA (never in mitosis gene a)-related kinase 6              | 10783  |
|  |  | <b>CPNE3</b>     | copine III                                                   | 8895   |
|  |  | <b>LOC375196</b> | hypothetical protein LOC375196                               | 375196 |
|  |  | <b>MLH3</b>      | mutL homolog 3 (E. coli)                                     | 27030  |
|  |  | <b>PRICKLE2</b>  | prickle homolog 2 (Drosophila)                               | 166336 |
|  |  | <b>SORL1</b>     | sortilin-related receptor, L(DLR class) A repeats-containing | 6653   |
|  |  | <b>CBR1</b>      | carbonyl reductase 1                                         | 873    |
|  |  | <b>LOH12CR1</b>  | loss of heterozygosity, 12, chromosomal region 1             | 118426 |
|  |  | <b>PGD</b>       | phosphogluconate dehydrogenase                               | 5226   |
|  |  | <b>XYLB</b>      | xylulokinase homolog (H. influenzae)                         | 9942   |
|  |  | <b>PLEKHO1</b>   | pleckstrin homology domain containing, family O member       | 51177  |



|  |  |                  |                                                                      |        |
|--|--|------------------|----------------------------------------------------------------------|--------|
|  |  | <b>PACSIN2</b>   | protein kinase C and casein kinase substrate in neurons 2            | 11252  |
|  |  | <b>KRT6C</b>     | keratin 6C                                                           | 286887 |
|  |  | <b>KIAA1772</b>  | KIAA1772                                                             | 80000  |
|  |  | <b>MKKS</b>      | McKusick-Kaufman syndrome                                            | 8195   |
|  |  | <b>IRX5</b>      | iroquois homeobox 5                                                  | 10265  |
|  |  | <b>ZNF354A</b>   | zinc finger protein 354A                                             | 6940   |
|  |  | <b>ZNF354C</b>   | zinc finger protein 354C                                             | 30832  |
|  |  | <b>CPNE1</b>     | copine I                                                             | 8904   |
|  |  | <b>ZNF331</b>    | zinc finger protein 331                                              | 55422  |
|  |  | <b>B4GALNT4</b>  | beta-1,4-N-acetyl-galactosaminyl transferase 4                       | 338707 |
|  |  | <b>RPS2P8</b>    | ribosomal protein S2 pseudogene 8                                    | 440589 |
|  |  | <b>LRRC58</b>    | leucine rich repeat containing 58                                    | 116064 |
|  |  | <b>C14orf179</b> | chromosome 14 open reading frame 179                                 | 112752 |
|  |  | <b>KGFLP2</b>    | keratinocyte growth factor-like protein 2                            | 654466 |
|  |  | <b>SOD1</b>      | superoxide dismutase 1, soluble                                      | 6647   |
|  |  | <b>C1orf186</b>  | chromosome 1 open reading frame 186                                  | 440712 |
|  |  | <b>KGFLP2</b>    | keratinocyte growth factor-like protein 2                            | 654466 |
|  |  | <b>BMP8A</b>     | bone morphogenetic protein 8a                                        | 353500 |
|  |  | <b>C1D</b>       | C1D nuclear receptor co-repressor                                    | 10438  |
|  |  | <b>ACAD11</b>    | acyl-Coenzyme A dehydrogenase family, member 11                      | 84129  |
|  |  | <b>DNAJB5</b>    | DnaJ (Hsp40) homolog, subfamily B, member 5                          | 25822  |
|  |  | <b>ZKSCAN2</b>   | zinc finger with KRAB and SCAN domains 2                             | 342357 |
|  |  | <b>CHCHD6</b>    | coiled-coil-helix-coiled-coil-helix domain containing 6              | 84303  |
|  |  | <b>TTC3</b>      | tetratricopeptide repeat domain 3                                    | 7267   |
|  |  | <b>ZNF174</b>    | zinc finger protein 174                                              | 7727   |
|  |  | <b>EIF2B5</b>    | eukaryotic translation initiation factor 2B, subunit 5 epsilon       | 8893   |
|  |  | <b>ATP5I</b>     | ATP synthase, H <sup>+</sup> transporting, mitochondrial F0 complex, | 521    |
|  |  | <b>ANAPC11</b>   | anaphase promoting complex subunit 11                                | 51529  |
|  |  | <b>PXK</b>       | PX domain containing serine/threonine kinase                         | 54899  |
|  |  | <b>MKX</b>       | mohawk homeobox                                                      | 283078 |
|  |  | <b>MORC4</b>     | MORC family CW-type zinc finger 4                                    | 79710  |
|  |  | <b>ACO3</b>      | acyl-Coenzyme A oxidase 3, pristanoyl                                | 8310   |
|  |  | <b>FGFBP3</b>    | fibroblast growth factor binding protein 3                           | 143282 |
|  |  | <b>AMZ2</b>      | archaelysin family metallopeptidase 2                                | 51321  |
|  |  | <b>LHPP</b>      | phospholysine phosphohistidine inorganic pyrophosphate               | 64077  |
|  |  | <b>ZNF512B</b>   | zinc finger protein 512B                                             | 57473  |
|  |  | <b>DHH</b>       | desert hedgehog homolog (Drosophila)                                 | 50846  |
|  |  | <b>MALT1</b>     | mucosa associated lymphoid tissue lymphoma translocati               | 10892  |
|  |  | <b>UNC119B</b>   | unc-119 homolog B (C. elegans)                                       | 84747  |
|  |  | <b>KRTAP20-1</b> | keratin associated protein 20-1                                      | 337975 |
|  |  | <b>SATB2</b>     | SATB homeobox 2                                                      | 23314  |

|  |  |                     |                                                           |           |
|--|--|---------------------|-----------------------------------------------------------|-----------|
|  |  | <b>NEDD4L</b>       | neural precursor cell expressed, developmentally down-re  | 23327     |
|  |  | <b>EEF1A2</b>       | eukaryotic translation elongation factor 1 alpha 2        | 1917      |
|  |  | <b>ZC3H14</b>       | zinc finger CCCH-type containing 14                       | 79882     |
|  |  | <b>ANAPC11</b>      | anaphase promoting complex subunit 11                     | 51529     |
|  |  | <b>ATP7A</b>        | ATPase, Cu <sup>++</sup> transporting, alpha polypeptide  | 538       |
|  |  | <b>MTP18</b>        | mitochondrial protein 18 kDa                              | 51537     |
|  |  | <b>C1D</b>          | C1D nuclear receptor co-repressor                         | 10438     |
|  |  | <b>C20orf94</b>     | chromosome 20 open reading frame 94                       | 128710    |
|  |  | <b>CCDC137</b>      | coiled-coil domain containing 137                         | 339230    |
|  |  | <b>YLPM1</b>        | YLP motif containing 1                                    | 56252     |
|  |  | <b>AOAH</b>         | acyloxyacyl hydrolase (neutrophil)                        | 313       |
|  |  | <b>TCF15</b>        | transcription factor 15 (basic helix-loop-helix)          | 6939      |
|  |  | <b>MED12L</b>       | mediator complex subunit 12-like                          | 116931    |
|  |  | <b>MSI1</b>         | musashi homolog 1 (Drosophila)                            | 4440      |
|  |  | <b>PHF10</b>        | PHD finger protein 10                                     | 55274     |
|  |  | <b>CDKN2AIPNL</b>   | CDKN2A interacting protein N-terminal like                | 91368     |
|  |  | <b>TMLHE</b>        | trimethyllysine hydroxylase, epsilon                      | 55217     |
|  |  | <b>CAD</b>          | carbamoyl-phosphate synthetase 2, aspartate transcarbam   | 790       |
|  |  | <b>LSM14B</b>       | LSM14B, SCD6 homolog B (S. cerevisiae)                    | 149986    |
|  |  | <b>GOLSYN</b>       | Golgi-localized protein                                   | 55638     |
|  |  | <b>G6PD</b>         | glucose-6-phosphate dehydrogenase                         | 2539      |
|  |  | <b>PIGH</b>         | phosphatidylinositol glycan anchor biosynthesis, class H  | 5283      |
|  |  | <b>PAAF1</b>        | proteasomal ATPase-associated factor 1                    | 80227     |
|  |  | <b>RNF186</b>       | ring finger protein 186                                   | 54546     |
|  |  | <b>TOP2B</b>        | topoisomerase (DNA) II beta 180kDa                        | 7155      |
|  |  | <b>RNF170</b>       | ring finger protein 170                                   | 81790     |
|  |  | <b>FAM125B</b>      | family with sequence similarity 125, member B             | 89853     |
|  |  | <b>C1D</b>          | C1D nuclear receptor co-repressor                         | 10438     |
|  |  | <b>DHFRL1</b>       | dihydrofolate reductase-like 1                            | 200895    |
|  |  | <b>TPI1</b>         | triosephosphate isomerase 1                               | 7167      |
|  |  | <b>NMNAT1</b>       | nicotinamide nucleotide adenyltransferase 1               | 64802     |
|  |  | <b>PPP1R14C</b>     | protein phosphatase 1, regulatory (inhibitor) subunit 14C | 81706     |
|  |  | <b>C7orf59</b>      | chromosome 7 open reading frame 59                        | 389541    |
|  |  | <b>LOC100125556</b> | family with sequence similarity 86, member A pseudogene   | 100125556 |
|  |  | <b>TRIM54</b>       | tripartite motif-containing 54                            | 57159     |
|  |  | <b>MTERFD1</b>      | MTERF domain containing 1                                 | 51001     |
|  |  | <b>MYH10</b>        | myosin, heavy chain 10, non-muscle                        | 4628      |
|  |  | <b>WDR59</b>        | WD repeat domain 59                                       | 79726     |
|  |  | <b>TM4SF1</b>       | transmembrane 4 L six family member 1                     | 4071      |
|  |  | <b>CBY1</b>         | chibby homolog 1 (Drosophila)                             | 25776     |
|  |  | <b>C10orf58</b>     | chromosome 10 open reading frame 58                       | 84293     |

|  |  |                 |                                                                     |        |
|--|--|-----------------|---------------------------------------------------------------------|--------|
|  |  | <b>HECTD1</b>   | HECT domain containing 1                                            | 25831  |
|  |  | <b>CBX6</b>     | chromobox homolog 6                                                 | 23466  |
|  |  | <b>COX16</b>    | COX16 cytochrome c oxidase assembly homolog (S. cerevisiae)         | 51241  |
|  |  | <b>FECH</b>     | ferrochelatase (protoporphyrin)                                     | 2235   |
|  |  | <b>ABHD12</b>   | abhydrolase domain containing 12                                    | 26090  |
|  |  | <b>RFT1</b>     | RFT1 homolog (S. cerevisiae)                                        | 91869  |
|  |  | <b>HDHD1A</b>   | haloacid dehalogenase-like hydrolase domain containing 1            | 8226   |
|  |  | <b>CD300C</b>   | CD300c molecule                                                     | 10871  |
|  |  | <b>RIPK4</b>    | receptor-interacting serine-threonine kinase 4                      | 54101  |
|  |  | <b>NEDD8</b>    | neural precursor cell expressed, developmentally down-regulated     | 4738   |
|  |  | <b>P2RY1</b>    | purinergic receptor P2Y, G-protein coupled, 1                       | 5028   |
|  |  | <b>AKR1B1</b>   | aldo-keto reductase family 1, member B1 (aldose reductase)          | 231    |
|  |  | <b>CSRP2BP</b>  | CSRP2 binding protein                                               | 57325  |
|  |  | <b>TCFL5</b>    | transcription factor-like 5 (basic helix-loop-helix)                | 10732  |
|  |  | <b>GALC</b>     | galactosylceramidase                                                | 2581   |
|  |  | <b>FASTKD5</b>  | FAST kinase domains 5                                               | 60493  |
|  |  | <b>MMAB</b>     | methylmalonic aciduria (cobalamin deficiency) cblB type             | 326625 |
|  |  | <b>MCM4</b>     | minichromosome maintenance complex component 4                      | 4173   |
|  |  | <b>STRA13</b>   | stimulated by retinoic acid 13 homolog (mouse)                      | 201254 |
|  |  | <b>C17orf88</b> | chromosome 17 open reading frame 88                                 | 23591  |
|  |  | <b>THNSL1</b>   | threonine synthase-like 1 (S. cerevisiae)                           | 79896  |
|  |  | <b>ZNRF3</b>    | zinc and ring finger 3                                              | 84133  |
|  |  | <b>TTC8</b>     | tetratricopeptide repeat domain 8                                   | 123016 |
|  |  | <b>SIAH3</b>    | seven in absentia homolog 3 (Drosophila)                            | 283514 |
|  |  | <b>MANEAL</b>   | mannosidase, endo-alpha-like                                        | 149175 |
|  |  | <b>DEXI</b>     | Dexi homolog (mouse)                                                | 28955  |
|  |  | <b>DEXI</b>     | Dexi homolog (mouse)                                                | 28955  |
|  |  | <b>LIG3</b>     | ligase III, DNA, ATP-dependent                                      | 3980   |
|  |  | <b>ATF4</b>     | activating transcription factor 4 (tax-responsive enhancer)         | 468    |
|  |  | <b>KLHDC2</b>   | kelch domain containing 2                                           | 23588  |
|  |  | <b>LPIN3</b>    | lipin 3                                                             | 64900  |
|  |  | <b>PPP2R3B</b>  | protein phosphatase 2 (formerly 2A), regulatory subunit B           | 28227  |
|  |  | <b>MSX1</b>     | msh homeobox 1                                                      | 4487   |
|  |  | <b>IRX6</b>     | iroquois homeobox 6                                                 | 79190  |
|  |  | <b>CBX1</b>     | chromobox homolog 1 (HP1 beta homolog Drosophila )                  | 10951  |
|  |  | <b>NDUFB8</b>   | NADH dehydrogenase (ubiquinone) 1 beta subcomplex, 8, mitochondrial | 4714   |
|  |  | <b>RPL7</b>     | ribosomal protein L7                                                | 6129   |
|  |  | <b>PRKAR2A</b>  | protein kinase, cAMP-dependent, regulatory, type II, alpha          | 5576   |
|  |  | <b>SLC23A2</b>  | solute carrier family 23 (nucleobase transporters), member 2        | 9962   |
|  |  | <b>MOSC2</b>    | MOCO sulphurase C-terminal domain containing 2                      | 54996  |
|  |  | <b>MSH2</b>     | mutS homolog 2, colon cancer, nonpolyposis type 1 (E. coli)         | 4436   |

|  |  |                  |                                                              |        |
|--|--|------------------|--------------------------------------------------------------|--------|
|  |  | <b>UBE4B</b>     | ubiquitination factor E4B (UFD2 homolog, yeast)              | 10277  |
|  |  | <b>SRGAP3</b>    | SLIT-ROBO Rho GTPase activating protein 3                    | 9901   |
|  |  | <b>ATP6V0E2</b>  | ATPase, H+ transporting V0 subunit e2                        | 155066 |
|  |  | <b>BMP3</b>      | bone morphogenetic protein 3                                 | 651    |
|  |  | <b>SNX4</b>      | sorting nexin 4                                              | 8723   |
|  |  | <b>RICH2</b>     | Rho-type GTPase-activating protein RICH2                     | 9912   |
|  |  | <b>HSPA12A</b>   | heat shock 70kDa protein 12A                                 | 259217 |
|  |  | <b>SEPN1</b>     | selenoprotein N, 1                                           | 57190  |
|  |  | <b>ERLIN2</b>    | ER lipid raft associated 2                                   | 11160  |
|  |  | <b>LAGE3</b>     | L antigen family, member 3                                   | 8270   |
|  |  | <b>NXP2</b>      | neurexophilin 2                                              | 11249  |
|  |  | <b>C14orf166</b> | chromosome 14 open reading frame 166                         | 51637  |
|  |  | <b>VKORC1</b>    | vitamin K epoxide reductase complex, subunit 1               | 79001  |
|  |  | <b>GCAT</b>      | glycine C-acetyltransferase (2-amino-3-ketobutyrate coenz    | 23464  |
|  |  | <b>MANF</b>      | mesencephalic astrocyte-derived neurotrophic factor          | 7873   |
|  |  | <b>PDLM4</b>     | PDZ and LIM domain 4                                         | 8572   |
|  |  | <b>RBKS</b>      | ribokinase                                                   | 64080  |
|  |  | <b>PDK3</b>      | pyruvate dehydrogenase kinase, isozyme 3                     | 5165   |
|  |  | <b>NUDT16</b>    | nudix (nucleoside diphosphate linked moiety X)-type moti     | 131870 |
|  |  | <b>AMN1</b>      | antagonist of mitotic exit network 1 homolog (S. cerevisiae) | 196394 |
|  |  | <b>ACAA1</b>     | acetyl-Coenzyme A acyltransferase 1                          | 30     |
|  |  | <b>PPFIA3</b>    | protein tyrosine phosphatase, receptor type, f polypeptide   | 8541   |
|  |  | <b>NUP93</b>     | nucleoporin 93kDa                                            | 9688   |
|  |  | <b>APPL2</b>     | adaptor protein, phosphotyrosine interaction, PH domain      | 55198  |
|  |  | <b>SKP2</b>      | S-phase kinase-associated protein 2 (p45)                    | 6502   |
|  |  | <b>CHST1</b>     | carbohydrate (keratan sulfate Gal-6) sulfotransferase 1      | 8534   |
|  |  | <b>MID1</b>      | midline 1 (Opitz/BBB syndrome)                               | 4281   |
|  |  | <b>PEX5</b>      | peroxisomal biogenesis factor 5                              | 5830   |
|  |  | <b>APEX1</b>     | APEX nuclease (multifunctional DNA repair enzyme) 1          | 328    |
|  |  | <b>RPN2</b>      | ribophorin II                                                | 6185   |
|  |  | <b>WDHD1</b>     | WD repeat and HMG-box DNA binding protein 1                  | 11169  |
|  |  | <b>SLC39A6</b>   | solute carrier family 39 (zinc transporter), member 6        | 25800  |
|  |  | <b>MCAT</b>      | malonyl CoA:ACP acyltransferase (mitochondrial)              | 27349  |
|  |  | <b>MPND</b>      | MPN domain containing                                        | 84954  |
|  |  | <b>BTNL9</b>     | butyrophilin-like 9                                          | 153579 |
|  |  | <b>HSN2</b>      | hereditary sensory neuropathy, type II                       | 378465 |
|  |  | <b>C2orf28</b>   | chromosome 2 open reading frame 28                           | 51374  |
|  |  | <b>BRE</b>       | brain and reproductive organ-expressed (TNFRSF1A modu        | 9577   |
|  |  | <b>MAMLD1</b>    | mastermind-like domain containing 1                          | 10046  |
|  |  | <b>TMEM64</b>    | transmembrane protein 64                                     | 169200 |
|  |  | <b>C12orf32</b>  | chromosome 12 open reading frame 32                          | 83695  |

|  |  |                  |                                                            |        |
|--|--|------------------|------------------------------------------------------------|--------|
|  |  | <b>LMBR1</b>     | limb region 1 homolog (mouse)                              | 64327  |
|  |  | <b>RNASET2</b>   | ribonuclease T2                                            | 8635   |
|  |  | <b>ERCC2</b>     | excision repair cross-complementing rodent repair deficien | 2068   |
|  |  | <b>GLIPR2</b>    | GLI pathogenesis-related 2                                 | 152007 |
|  |  | <b>DYNLT3</b>    | dynein, light chain, Tctex-type 3                          | 6990   |
|  |  | <b>DLL3</b>      | delta-like 3 (Drosophila)                                  | 10683  |
|  |  | <b>MAGEF1</b>    | melanoma antigen family F, 1                               | 64110  |
|  |  | <b>ARFGAP3</b>   | ADP-ribosylation factor GTPase activating protein 3        | 26286  |
|  |  | <b>NHP2</b>      | NHP2 ribonucleoprotein homolog (yeast)                     | 55651  |
|  |  | <b>TMEM106C</b>  | transmembrane protein 106C                                 | 79022  |
|  |  | <b>C3orf39</b>   | chromosome 3 open reading frame 39                         | 84892  |
|  |  | <b>CHDH</b>      | choline dehydrogenase                                      | 55349  |
|  |  | <b>SEC23A</b>    | Sec23 homolog A (S. cerevisiae)                            | 10484  |
|  |  | <b>CDCA4</b>     | cell division cycle associated 4                           | 55038  |
|  |  | <b>ERH</b>       | enhancer of rudimentary homolog (Drosophila)               | 2079   |
|  |  | <b>AMN</b>       | amnionless homolog (mouse)                                 | 81693  |
|  |  | <b>SAMM50</b>    | sorting and assembly machinery component 50 homolog (      | 25813  |
|  |  | <b>GPD1L</b>     | glycerol-3-phosphate dehydrogenase 1-like                  | 23171  |
|  |  | <b>FLYWCH2</b>   | FLYWCH family member 2                                     | 114984 |
|  |  | <b>MLF2</b>      | myeloid leukemia factor 2                                  | 8079   |
|  |  | <b>HSP90AA5P</b> | heat shock protein 90kDa alpha (cytosolic), class A membe  | 730211 |
|  |  | <b>RPL7</b>      | ribosomal protein L7                                       | 6129   |
|  |  | <b>RPL7</b>      | ribosomal protein L7                                       | 6129   |
|  |  | <b>UNCX</b>      | UNC homeobox                                               | 340260 |
|  |  | <b>C22orf28</b>  | chromosome 22 open reading frame 28                        | 51493  |
|  |  | <b>IMPACT</b>    | Impact homolog (mouse)                                     | 55364  |
|  |  | <b>TCEA1</b>     | transcription elongation factor A (SII), 1                 | 6917   |
|  |  | <b>PHKB</b>      | phosphorylase kinase, beta                                 | 5257   |
|  |  | <b>TMEM55B</b>   | transmembrane protein 55B                                  | 90809  |
|  |  | <b>ACAD10</b>    | acyl-Coenzyme A dehydrogenase family, member 10            | 80724  |
|  |  | <b>GLRX5</b>     | glutaredoxin 5                                             | 51218  |
|  |  | <b>GALNTL1</b>   | UDP-N-acetyl-alpha-D-galactosamine:polypeptide N-acety     | 57452  |
|  |  | <b>BRF1</b>      | BRF1 homolog, subunit of RNA polymerase III transcrip      | 2972   |
|  |  | <b>MKS1</b>      | Meckel syndrome, type 1                                    | 54903  |
|  |  | <b>CDH26</b>     | cadherin-like 26                                           | 60437  |
|  |  | <b>SLC26A9</b>   | solute carrier family 26, member 9                         | 115019 |
|  |  | <b>C17orf75</b>  | chromosome 17 open reading frame 75                        | 64149  |
|  |  | <b>PODXL2</b>    | podocalyxin-like 2                                         | 50512  |
|  |  | <b>TCEA1</b>     | transcription elongation factor A (SII), 1                 | 6917   |
|  |  | <b>ADCY1</b>     | adenylate cyclase 1 (brain)                                | 107    |
|  |  | <b>PRKX</b>      | protein kinase, X-linked                                   | 5613   |

|  |  |                  |                                                             |           |
|--|--|------------------|-------------------------------------------------------------|-----------|
|  |  | <b>MIF</b>       | macrophage migration inhibitory factor (glycosylation-inhi  | 4282      |
|  |  | <b>RCAN1</b>     | regulator of calcineurin 1                                  | 1827      |
|  |  | <b>RPN1</b>      | ribophorin I                                                | 6184      |
|  |  | <b>CCDC61</b>    | coiled-coil domain containing 61                            | 729440    |
|  |  | <b>PPAP2B</b>    | phosphatidic acid phosphatase type 2B                       | 8613      |
|  |  | <b>ATXN10</b>    | ataxin 10                                                   | 25814     |
|  |  | <b>FAM10A4</b>   | ST13-like tumor suppressor                                  | 145165    |
|  |  | <b>FAT1</b>      | FAT tumor suppressor homolog 1 (Drosophila)                 | 2195      |
|  |  | <b>CD83</b>      | CD83 molecule                                               | 9308      |
|  |  | <b>HIST1H4C</b>  | histone cluster 1, H4c                                      | 8364      |
|  |  | <b>GBX2</b>      | gastrulation brain homeobox 2                               | 2637      |
|  |  | <b>CCDC11</b>    | coiled-coil domain containing 11                            | 220136    |
|  |  | <b>SAMD12</b>    | sterile alpha motif domain containing 12                    | 401474    |
|  |  | <b>COPS4</b>     | COP9 constitutive photomorphogenic homolog subunit 4 (      | 51138     |
|  |  | <b>RBX1</b>      | ring-box 1                                                  | 9978      |
|  |  | <b>ISY1</b>      | ISY1 splicing factor homolog (S. cerevisiae)                | 57461     |
|  |  | <b>SIPA1L1</b>   | signal-induced proliferation-associated 1 like 1            | 26037     |
|  |  | <b>ADAMTS7</b>   | ADAM metallopeptidase with thrombospondin type 1 mot        | 11173     |
|  |  | <b>HEYL</b>      | hairy/enhancer-of-split related with YRPW motif-like        | 26508     |
|  |  | <b>NDUFA6</b>    | NADH dehydrogenase (ubiquinone) 1 alpha subcomplex, 6       | 4700      |
|  |  | <b>SPAST</b>     | spastin                                                     | 6683      |
|  |  | <b>SIVA1</b>     | SIVA1, apoptosis-inducing factor                            | 10572     |
|  |  | <b>APOO</b>      | apolipoprotein O                                            | 79135     |
|  |  | <b>VIPR1</b>     | vasoactive intestinal peptide receptor 1                    | 7433      |
|  |  | <b>ZNF48</b>     | zinc finger protein 48                                      | 197407    |
|  |  | <b>CDIPT</b>     | CDP-diacylglycerol--inositol 3-phosphatidyltransferase (ph  | 10423     |
|  |  | <b>DENND2C</b>   | DENN/MADD domain containing 2C                              | 163259    |
|  |  | <b>QPCTL</b>     | glutaminyl-peptide cyclotransferase-like                    | 54814     |
|  |  | <b>RPS3A</b>     | ribosomal protein S3A                                       | 6189      |
|  |  | <b>TRIB3</b>     | tribbles homolog 3 (Drosophila)                             | 57761     |
|  |  | <b>LOC440461</b> | SH3 domain containing 20 pseudogene                         | 440461    |
|  |  | <b>XPNPEP3</b>   | X-prolyl aminopeptidase (aminopeptidase P) 3, putative      | 63929     |
|  |  | <b>KRT9</b>      | keratin 9                                                   | 3857      |
|  |  | <b>DDTL</b>      | D-dopachrome tautomerase-like                               | 100037417 |
|  |  | <b>OLFM2</b>     | olfactomedin 2                                              | 93145     |
|  |  | <b>EHHADH</b>    | enoyl-Coenzyme A, hydratase/3-hydroxyacyl Coenzyme A        | 1962      |
|  |  | <b>GPIHBP1</b>   | glycosylphosphatidylinositol anchored high density lipoproc | 338328    |
|  |  | <b>TPI1</b>      | triosephosphate isomerase 1                                 | 7167      |
|  |  | <b>NSMCE1</b>    | non-SMC element 1 homolog (S. cerevisiae)                   | 197370    |
|  |  | <b>P4HB</b>      | prolyl 4-hydroxylase, beta polypeptide                      | 5034      |
|  |  | <b>C20orf30</b>  | chromosome 20 open reading frame 30                         | 29058     |

|  |  |                 |                                                           |        |
|--|--|-----------------|-----------------------------------------------------------|--------|
|  |  | <b>C2orf44</b>  | chromosome 2 open reading frame 44                        | 80304  |
|  |  | <b>FAM84A</b>   | family with sequence similarity 84, member A              | 151354 |
|  |  | <b>MORC4</b>    | MORC family CW-type zinc finger 4                         | 79710  |
|  |  | <b>NAT8L</b>    | N-acetyltransferase 8-like (GCN5-related, putative)       | 339983 |
|  |  | <b>SOX6</b>     | SRY (sex determining region Y)-box 6                      | 55553  |
|  |  | <b>UQCRC1</b>   | ubiquinol-cytochrome c reductase core protein I           | 7384   |
|  |  | <b>KIAA1737</b> | KIAA1737                                                  | 85457  |
|  |  | <b>CEP70</b>    | centrosomal protein 70kDa                                 | 80321  |
|  |  | <b>CYP2U1</b>   | cytochrome P450, family 2, subfamily U, polypeptide 1     | 113612 |
|  |  | <b>B9D1</b>     | B9 protein domain 1                                       | 27077  |
|  |  | <b>EXOSC7</b>   | exosome component 7                                       | 23016  |
|  |  | <b>CHST2</b>    | carbohydrate (N-acetylglucosamine-6-O) sulfotransferase   | 9435   |
|  |  | <b>PRMT5</b>    | protein arginine methyltransferase 5                      | 10419  |
|  |  | <b>L2HGDH</b>   | L-2-hydroxyglutarate dehydrogenase                        | 79944  |
|  |  | <b>KIAA0748</b> | KIAA0748                                                  | 9840   |
|  |  | <b>PABPC3</b>   | poly(A) binding protein, cytoplasmic 3                    | 5042   |
|  |  | <b>FAM18A</b>   | family with sequence similarity 18, member A              | 780776 |
|  |  | <b>ZNF786</b>   | zinc finger protein 786                                   | 136051 |
|  |  | <b>KRAS</b>     | v-Ki-ras2 Kirsten rat sarcoma viral oncogene homolog      | 3845   |
|  |  | <b>CNPY4</b>    | canopy 4 homolog (zebrafish)                              | 245812 |
|  |  | <b>PPP2R3B</b>  | protein phosphatase 2 (formerly 2A), regulatory subunit B | 28227  |
|  |  | <b>LRRC41</b>   | leucine rich repeat containing 41                         | 10489  |
|  |  | <b>RDH11</b>    | retinol dehydrogenase 11 (all-trans/9-cis/11-cis)         | 51109  |
|  |  | <b>TMX1</b>     | thioredoxin-related transmembrane protein 1               | 81542  |
|  |  | <b>POLE2</b>    | polymerase (DNA directed), epsilon 2 (p59 subunit)        | 5427   |
|  |  | <b>NARF</b>     | nuclear prelamin A recognition factor                     | 26502  |
|  |  | <b>IGSF10</b>   | immunoglobulin superfamily, member 10                     | 285313 |
|  |  | <b>GPX2</b>     | glutathione peroxidase 2 (gastrointestinal)               | 2877   |
|  |  | <b>LSP1</b>     | lymphocyte-specific protein 1                             | 4046   |
|  |  | <b>SLC1A7</b>   | solute carrier family 1 (glutamate transporter), member 7 | 6512   |
|  |  | <b>FLNB</b>     | filamin B, beta                                           | 2317   |
|  |  | <b>FAM13C</b>   | family with sequence similarity 13, member C              | 220965 |
|  |  | <b>INHBE</b>    | inhibin, beta E                                           | 83729  |
|  |  | <b>C21orf33</b> | chromosome 21 open reading frame 33                       | 8209   |
|  |  | <b>TPRXL</b>    | tetra-peptide repeat homeobox-like                        | 348825 |
|  |  | <b>ASPH</b>     | aspartate beta-hydroxylase                                | 444    |
|  |  | <b>HSD17B12</b> | hydroxysteroid (17-beta) dehydrogenase 12                 | 51144  |
|  |  | <b>ASCC1</b>    | activating signal cointegrator 1 complex subunit 1        | 51008  |
|  |  | <b>CABLES2</b>  | Cdk5 and Abl enzyme substrate 2                           | 81928  |
|  |  | <b>GALR1</b>    | galanin receptor 1                                        | 2587   |
|  |  | <b>DAD1</b>     | defender against cell death 1                             | 1603   |



|  |  |                  |                                                               |        |
|--|--|------------------|---------------------------------------------------------------|--------|
|  |  | <b>HIST1H3I</b>  | histone cluster 1, H3i                                        | 8354   |
|  |  | <b>C17orf101</b> | chromosome 17 open reading frame 101                          | 79701  |
|  |  | <b>NKX2-4</b>    | NK2 homeobox 4                                                | 644524 |
|  |  | <b>EAPP</b>      | E2F-associated phosphoprotein                                 | 55837  |
|  |  | <b>KRTAP9-2</b>  | keratin associated protein 9-2                                | 83899  |
|  |  | <b>PRB3</b>      | proline-rich protein BstNI subfamily 3                        | 5544   |
|  |  | <b>LOC440300</b> | chondroitin sulfate proteoglycan 4 pseudogene                 | 440300 |
|  |  | <b>ACAP2</b>     | ArfGAP with coiled-coil, ankyrin repeat and PH domains 2      | 23527  |
|  |  | <b>ATG2B</b>     | ATG2 autophagy related 2 homolog B ( <i>S. cerevisiae</i> )   | 55102  |
|  |  | <b>MFSD4</b>     | major facilitator superfamily domain containing 4             | 148808 |
|  |  | <b>RALY</b>      | RNA binding protein, autoantigenic (hnRNP-associated with     | 22913  |
|  |  | <b>ZBED4</b>     | zinc finger, BED-type containing 4                            | 9889   |
|  |  | <b>SNX17</b>     | sorting nexin 17                                              | 9784   |
|  |  | <b>SCAND1</b>    | SCAN domain containing 1                                      | 51282  |
|  |  | <b>SNX21</b>     | sorting nexin family member 21                                | 90203  |
|  |  | <b>B3GNT4</b>    | UDP-GlcNAc:betaGal beta-1,3-N-acetylglucosaminyltransferase   | 79369  |
|  |  | <b>LOC392510</b> | tyrosine 3/tryptophan 5 -monooxygenase activation protein     | 392510 |
|  |  | <b>DEGS1</b>     | degenerative spermatocyte homolog 1, lipid desaturase (D      | 8560   |
|  |  | <b>FAM118A</b>   | family with sequence similarity 118, member A                 | 55007  |
|  |  | <b>DLX1</b>      | distal-less homeobox 1                                        | 1745   |
|  |  | <b>GPS1</b>      | G protein pathway suppressor 1                                | 2873   |
|  |  | <b>DDRGK1</b>    | DDRGK domain containing 1                                     | 65992  |
|  |  | <b>RRP7B</b>     | ribosomal RNA processing 7 homolog B ( <i>S. cerevisiae</i> ) | 91695  |
|  |  | <b>VAX1</b>      | ventral anterior homeobox 1                                   | 11023  |
|  |  | <b>NGFR</b>      | nerve growth factor receptor (TNFR superfamily, member        | 4804   |
|  |  | <b>ACAD9</b>     | acyl-Coenzyme A dehydrogenase family, member 9                | 28976  |
|  |  | <b>WRB</b>       | tryptophan rich basic protein                                 | 7485   |
|  |  | <b>FNTB</b>      | farnesyltransferase, CAAX box, beta                           | 2342   |
|  |  | <b>ASPSCR1</b>   | alveolar soft part sarcoma chromosome region, candidate       | 79058  |
|  |  | <b>TMED10</b>    | transmembrane emp24-like trafficking protein 10 (yeast)       | 10972  |
|  |  | <b>BOLA3</b>     | bolA homolog 3 ( <i>E. coli</i> )                             | 388962 |
|  |  | <b>CHST9</b>     | carbohydrate (N-acetylgalactosamine 4-O) sulfotransferase     | 83539  |
|  |  | <b>POLI</b>      | polymerase (DNA directed) iota                                | 11201  |
|  |  | <b>CLNS1A</b>    | chloride channel, nucleotide-sensitive, 1A                    | 1207   |
|  |  | <b>TNS1</b>      | tensin 1                                                      | 7145   |
|  |  | <b>NUDT16L1</b>  | nudix (nucleoside diphosphate linked moiety X)-type motif     | 84309  |
|  |  | <b>C14orf80</b>  | chromosome 14 open reading frame 80                           | 283643 |
|  |  | <b>SLC46A1</b>   | solute carrier family 46 (folate transporter), member 1       | 113235 |
|  |  | <b>CDH24</b>     | cadherin-like 24                                              | 64403  |
|  |  | <b>TTLL12</b>    | tubulin tyrosine ligase-like family, member 12                | 23170  |
|  |  | <b>DLD</b>       | dihydrolipoamide dehydrogenase                                | 1738   |

|  |  |                     |                                                               |           |
|--|--|---------------------|---------------------------------------------------------------|-----------|
|  |  | <b>FAM96B</b>       | family with sequence similarity 96, member B                  | 51647     |
|  |  | <b>NCOR2</b>        | nuclear receptor co-repressor 2                               | 9612      |
|  |  | <b>ADIPOR2</b>      | adiponectin receptor 2                                        | 79602     |
|  |  | <b>CLMN</b>         | calmin (calponin-like, transmembrane)                         | 79789     |
|  |  | <b>AKT1</b>         | v-akt murine thymoma viral oncogene homolog 1                 | 207       |
|  |  | <b>C16orf5</b>      | chromosome 16 open reading frame 5                            | 29965     |
|  |  | <b>RAD52</b>        | RAD52 homolog ( <i>S. cerevisiae</i> )                        | 5893      |
|  |  | <b>GPLD1</b>        | glycosylphosphatidylinositol specific phospholipase D1        | 2822      |
|  |  | <b>IFT52</b>        | intraflagellar transport 52 homolog ( <i>Chlamydomonas</i> )  | 51098     |
|  |  | <b>CD93</b>         | CD93 molecule                                                 | 22918     |
|  |  | <b>POFUT1</b>       | protein O-fucosyltransferase 1                                | 23509     |
|  |  | <b>NARFL</b>        | nuclear prelamin A recognition factor-like                    | 64428     |
|  |  | <b>FAM158A</b>      | family with sequence similarity 158, member A                 | 51016     |
|  |  | <b>C3orf1</b>       | chromosome 3 open reading frame 1                             | 51300     |
|  |  | <b>VARS2</b>        | valyl-tRNA synthetase 2, mitochondrial (putative)             | 57176     |
|  |  | <b>HUWE1</b>        | HECT, UBA and WWE domain containing 1                         | 10075     |
|  |  | <b>ADCY9</b>        | adenylate cyclase 9                                           | 115       |
|  |  | <b>ZNF18</b>        | zinc finger protein 18                                        | 7566      |
|  |  | <b>NSF</b>          | N-ethylmaleimide-sensitive factor                             | 4905      |
|  |  | <b>CYP4V2</b>       | cytochrome P450, family 4, subfamily V, polypeptide 2         | 285440    |
|  |  | <b>ABCB8</b>        | ATP-binding cassette, sub-family B (MDR/TAP), member 8        | 11194     |
|  |  | <b>PDIA4</b>        | protein disulfide isomerase family A, member 4                | 9601      |
|  |  | <b>PDLIM3</b>       | PDZ and LIM domain 3                                          | 27295     |
|  |  | <b>ZFYVE9</b>       | zinc finger, FYVE domain containing 9                         | 9372      |
|  |  | <b>THY1</b>         | Thy-1 cell surface antigen                                    | 7070      |
|  |  | <b>ALDH3A2</b>      | aldehyde dehydrogenase 3 family, member A2                    | 224       |
|  |  | <b>SCARNA22</b>     | small Cajal body-specific RNA 22                              | 677770    |
|  |  | <b>VARS2</b>        | valyl-tRNA synthetase 2, mitochondrial (putative)             | 57176     |
|  |  | <b>RNF168</b>       | ring finger protein 168                                       | 165918    |
|  |  | <b>FAM184B</b>      | family with sequence similarity 184, member B                 | 27146     |
|  |  | <b>C8orf78</b>      | chromosome 8 open reading frame 78                            | 157376    |
|  |  | <b>ATG2B</b>        | ATG2 autophagy related 2 homolog B ( <i>S. cerevisiae</i> )   | 55102     |
|  |  | <b>C18orf22</b>     | chromosome 18 open reading frame 22                           | 79863     |
|  |  | <b>CDC42BPB</b>     | CDC42 binding protein kinase beta (DMPK-like)                 | 9578      |
|  |  | <b>NARS2</b>        | asparaginyl-tRNA synthetase 2, mitochondrial (putative)       | 79731     |
|  |  | <b>LOC100131642</b> | PP5241                                                        | 100131642 |
|  |  | <b>TSR2</b>         | TSR2, 20S rRNA accumulation, homolog ( <i>S. cerevisiae</i> ) | 90121     |
|  |  | <b>C19orf46</b>     | chromosome 19 open reading frame 46                           | 163183    |
|  |  | <b>C14orf153</b>    | chromosome 14 open reading frame 153                          | 84334     |
|  |  | <b>C17orf90</b>     | chromosome 17 open reading frame 90                           | 339229    |
|  |  | <b>SLC35D3</b>      | solute carrier family 35, member D3                           | 340146    |

|  |  |                     |                                                                 |           |
|--|--|---------------------|-----------------------------------------------------------------|-----------|
|  |  | <b>NT5C</b>         | 5', 3'-nucleotidase, cytosolic                                  | 30833     |
|  |  | <b>MAP4K5</b>       | mitogen-activated protein kinase kinase kinase kinase 5         | 11183     |
|  |  | <b>AIFM1</b>        | apoptosis-inducing factor, mitochondrion-associated, 1          | 9131      |
|  |  | <b>C9orf71</b>      | chromosome 9 open reading frame 71                              | 169693    |
|  |  | <b>C21orf45</b>     | chromosome 21 open reading frame 45                             | 54069     |
|  |  | <b>EXOC3</b>        | exocyst complex component 3                                     | 11336     |
|  |  | <b>FLJ45831</b>     | hypothetical FLJ45831                                           | 400576    |
|  |  | <b>ALDH4A1</b>      | aldehyde dehydrogenase 4 family, member A1                      | 8659      |
|  |  | <b>ISCA2</b>        | iron-sulfur cluster assembly 2 homolog ( <i>S. cerevisiae</i> ) | 122961    |
|  |  | <b>EVL</b>          | Enah/Vasp-like                                                  | 51466     |
|  |  | <b>STRBP</b>        | spermatid perinuclear RNA binding protein                       | 55342     |
|  |  | <b>NBAS</b>         | neuroblastoma amplified sequence                                | 51594     |
|  |  | <b>EXD2</b>         | exonuclease 3'-5' domain containing 2                           | 55218     |
|  |  | <b>QARS</b>         | glutaminyl-tRNA synthetase                                      | 5859      |
|  |  | <b>FBF1</b>         | Fas (TNFRSF6) binding factor 1                                  | 85302     |
|  |  | <b>BAG5</b>         | BCL2-associated athanogene 5                                    | 9529      |
|  |  | <b>CHL1</b>         | cell adhesion molecule with homology to L1CAM (close ho         | 10752     |
|  |  | <b>SGSM3</b>        | small G protein signaling modulator 3                           | 27352     |
|  |  | <b>KIRREL3</b>      | kin of IRRE like 3 ( <i>Drosophila</i> )                        | 84623     |
|  |  | <b>THOC3</b>        | THO complex 3                                                   | 84321     |
|  |  | <b>RAB11FIP3</b>    | RAB11 family interacting protein 3 (class II)                   | 9727      |
|  |  | <b>PCMTD2</b>       | protein-L-isoaspartate (D-aspartate) O-methyltransferase c      | 55251     |
|  |  | <b>DSCAML1</b>      | Down syndrome cell adhesion molecule like 1                     | 57453     |
|  |  | <b>PHB2</b>         | prohibitin 2                                                    | 11331     |
|  |  | <b>LOC100130236</b> | hypothetical LOC100130236                                       | 100130236 |
|  |  | <b>PLA2G3</b>       | phospholipase A2, group III                                     | 50487     |
|  |  | <b>C11orf87</b>     | chromosome 11 open reading frame 87                             | 399947    |
|  |  | <b>FKBP3</b>        | FK506 binding protein 3, 25kDa                                  | 2287      |
|  |  | <b>RPUSD3</b>       | RNA pseudouridylate synthase domain containing 3                | 285367    |
|  |  | <b>CCDC127</b>      | coiled-coil domain containing 127                               | 133957    |
|  |  | <b>PTPRA</b>        | protein tyrosine phosphatase, receptor type, A                  | 5786      |
|  |  | <b>C17orf74</b>     | chromosome 17 open reading frame 74                             | 201243    |
|  |  | <b>WBSCR22</b>      | Williams Beuren syndrome chromosome region 22                   | 114049    |
|  |  | <b>PPP2R5E</b>      | protein phosphatase 2, regulatory subunit B', epsilon isofo     | 5529      |
|  |  | <b>FAM127A</b>      | family with sequence similarity 127, member A                   | 8933      |
|  |  | <b>JAGN1</b>        | jagunal homolog 1 ( <i>Drosophila</i> )                         | 84522     |
|  |  | <b>GBAS</b>         | glioblastoma amplified sequence                                 | 2631      |
|  |  | <b>FBXO11</b>       | F-box protein 11                                                | 80204     |
|  |  | <b>PCYOX1</b>       | prenylcysteine oxidase 1                                        | 51449     |
|  |  | <b>SS18L2</b>       | synovial sarcoma translocation gene on chromosome 18-li         | 51188     |
|  |  | <b>MAP3K7IP1</b>    | mitogen-activated protein kinase kinase kinase 7 interacti      | 10454     |

|  |                 |                                                            |        |
|--|-----------------|------------------------------------------------------------|--------|
|  | <b>ATP6V0E2</b> | ATPase, H+ transporting V0 subunit e2                      | 155066 |
|  | <b>CTXN1</b>    | cortexin 1                                                 | 404217 |
|  | <b>LRP4</b>     | low density lipoprotein receptor-related protein 4         | 4038   |
|  | <b>DDN</b>      | dendrin                                                    | 23109  |
|  | <b>DMBT1</b>    | deleted in malignant brain tumors 1                        | 1755   |
|  | <b>MTHFD1</b>   | methylenetetrahydrofolate dehydrogenase (NADP+ depen       | 4522   |
|  | <b>REXO1L2P</b> | REX1, RNA exonuclease 1 homolog (S. cerevisiae)-like 2 (ps | 441362 |
|  | <b>REXO1L2P</b> | REX1, RNA exonuclease 1 homolog (S. cerevisiae)-like 2 (ps | 441362 |
|  | <b>REXO1L2P</b> | REX1, RNA exonuclease 1 homolog (S. cerevisiae)-like 2 (ps | 441362 |
|  | <b>USP48</b>    | ubiquitin specific peptidase 48                            | 84196  |
|  | <b>MSH6</b>     | mutS homolog 6 (E. coli)                                   | 2956   |
|  | <b>SEPHS2</b>   | selenophosphate synthetase 2                               | 22928  |
|  | <b>TUFM</b>     | Tu translation elongation factor, mitochondrial            | 7284   |
|  | <b>CSNK2A1</b>  | casein kinase 2, alpha 1 polypeptide                       | 1457   |
|  | <b>C19orf34</b> | chromosome 19 open reading frame 34                        | 255193 |
|  | <b>RWDD2B</b>   | RWD domain containing 2B                                   | 10069  |
|  | <b>RETSAT</b>   | retinol saturase (all-trans-retinol 13,14-reductase)       | 54884  |
|  | <b>SAV1</b>     | salvador homolog 1 (Drosophila)                            | 60485  |
|  | <b>NR3C1</b>    | nuclear receptor subfamily 3, group C, member 1 (glucoco   | 2908   |
|  | <b>ART1</b>     | ADP-ribosyltransferase 1                                   | 417    |
|  | <b>MPP3</b>     | membrane protein, palmitoylated 3 (MAGUK p55 subfami       | 4356   |
|  | <b>ZCCHC3</b>   | zinc finger, CCHC domain containing 3                      | 85364  |
|  | <b>C5orf55</b>  | chromosome 5 open reading frame 55                         | 116349 |
|  | <b>TRIT1</b>    | tRNA isopentenyltransferase 1                              | 54802  |
|  | <b>CMAS</b>     | cytidine monophosphate N-acetylneuraminic acid synthet     | 55907  |
|  | <b>PARP2</b>    | poly (ADP-ribose) polymerase 2                             | 10038  |
|  | <b>RBM23</b>    | RNA binding motif protein 23                               | 55147  |
|  | <b>THOC3</b>    | THO complex 3                                              | 84321  |
|  | <b>ARHGAP5</b>  | Rho GTPase activating protein 5                            | 394    |
|  | <b>PACS2</b>    | phosphofurin acidic cluster sorting protein 2              | 23241  |
|  | <b>AKR7A2</b>   | aldo-keto reductase family 7, member A2 (aflatoxin aldehy  | 8574   |
|  | <b>HMGN1</b>    | high-mobility group nucleosome binding domain 1            | 3150   |
|  | <b>C20orf11</b> | chromosome 20 open reading frame 11                        | 54994  |
|  | <b>LRCH3</b>    | leucine-rich repeats and calponin homology (CH) domain c   | 84859  |
|  | <b>PITPNA</b>   | phosphatidylinositol transfer protein, alpha               | 5306   |
|  | <b>RTN4R</b>    | reticulon 4 receptor                                       | 65078  |
|  | <b>ADCK1</b>    | aarF domain containing kinase 1                            | 57143  |
|  | <b>PGRMC1</b>   | progesterone receptor membrane component 1                 | 10857  |
|  | <b>C16orf70</b> | chromosome 16 open reading frame 70                        | 80262  |
|  | <b>OR10J5</b>   | olfactory receptor, family 10, subfamily J, member 5       | 127385 |
|  | <b>RAB7B</b>    | RAB7B, member RAS oncogene family                          | 338382 |

|  |  |                  |                                                                      |        |
|--|--|------------------|----------------------------------------------------------------------|--------|
|  |  | <b>UBAC2</b>     | UBA domain containing 2                                              | 337867 |
|  |  | <b>ZNF154</b>    | zinc finger protein 154                                              | 7710   |
|  |  | <b>TSEN54</b>    | tRNA splicing endonuclease 54 homolog ( <i>S. cerevisiae</i> )       | 283989 |
|  |  | <b>EMD</b>       | emerin                                                               | 2010   |
|  |  | <b>CELA1</b>     | chymotrypsin-like elastase family, member 1                          | 1990   |
|  |  | <b>SLC2A4RG</b>  | SLC2A4 regulator                                                     | 56731  |
|  |  | <b>ATP5A1</b>    | ATP synthase, H <sup>+</sup> transporting, mitochondrial F1 complex, | 498    |
|  |  | <b>NXT2</b>      | nuclear transport factor 2-like export factor 2                      | 55916  |
|  |  | <b>PINK1</b>     | PTEN induced putative kinase 1                                       | 65018  |
|  |  | <b>ALOX12B</b>   | arachidonate 12-lipoxygenase, 12R type                               | 242    |
|  |  | <b>C20orf194</b> | chromosome 20 open reading frame 194                                 | 25943  |
|  |  | <b>NDRG3</b>     | NDRG family member 3                                                 | 57446  |
|  |  | <b>ATPAF2</b>    | ATP synthase mitochondrial F1 complex assembly factor 2              | 91647  |
|  |  | <b>KRT84</b>     | keratin 84                                                           | 3890   |
|  |  | <b>RPS7</b>      | ribosomal protein S7                                                 | 6201   |
|  |  | <b>KDM1</b>      | lysine (K)-specific demethylase 1                                    | 23028  |
|  |  | <b>RPSA</b>      | ribosomal protein SA                                                 | 3921   |
|  |  | <b>PRR7</b>      | proline rich 7 (synaptic)                                            | 80758  |
|  |  | <b>SLC41A3</b>   | solute carrier family 41, member 3                                   | 54946  |
|  |  | <b>NTN3</b>      | netrin 3                                                             | 4917   |
|  |  | <b>C6orf108</b>  | chromosome 6 open reading frame 108                                  | 10591  |
|  |  | <b>RPL36AL</b>   | ribosomal protein L36a-like                                          | 6166   |
|  |  | <b>MAPK9</b>     | mitogen-activated protein kinase 9                                   | 5601   |
|  |  | <b>KLRAQ1</b>    | KLRAQ motif containing 1                                             | 129285 |
|  |  | <b>ADH5P4</b>    | alcohol dehydrogenase 5 (class III), chi polypeptide, pseud          | 642443 |
|  |  | <b>PXMP2</b>     | peroxisomal membrane protein 2, 22kDa                                | 5827   |
|  |  | <b>NHP2</b>      | NHP2 ribonucleoprotein homolog (yeast)                               | 55651  |
|  |  | <b>NMRAL1</b>    | NmrA-like family domain containing 1                                 | 57407  |
|  |  | <b>BEST2</b>     | bestrophin 2                                                         | 54831  |
|  |  | <b>DECR2</b>     | 2,4-dienoyl CoA reductase 2, peroxisomal                             | 26063  |
|  |  | <b>PRKCH</b>     | protein kinase C, eta                                                | 5583   |
|  |  | <b>C9orf23</b>   | chromosome 9 open reading frame 23                                   | 138716 |
|  |  | <b>ZXDC</b>      | ZXD family zinc finger C                                             | 79364  |
|  |  | <b>C3orf45</b>   | chromosome 3 open reading frame 45                                   | 132228 |
|  |  | <b>C20orf20</b>  | chromosome 20 open reading frame 20                                  | 55257  |
|  |  | <b>LOC202181</b> | hypothetical protein LOC202181                                       | 202181 |
|  |  | <b>RNF7</b>      | ring finger protein 7                                                | 9616   |
|  |  | <b>F12</b>       | coagulation factor XII (Hageman factor)                              | 2161   |
|  |  | <b>PANK2</b>     | pantothenate kinase 2                                                | 80025  |
|  |  | <b>NDUFB4</b>    | NADH dehydrogenase (ubiquinone) 1 beta subcomplex, 4,                | 4710   |
|  |  | <b>NDUFB4</b>    | NADH dehydrogenase (ubiquinone) 1 beta subcomplex, 4,                | 4710   |

|  |  |                  |                                                                |        |
|--|--|------------------|----------------------------------------------------------------|--------|
|  |  | <b>P4HB</b>      | prolyl 4-hydroxylase, beta polypeptide                         | 5034   |
|  |  | <b>TSPO</b>      | translocator protein (18kDa)                                   | 706    |
|  |  | <b>JAKMIP3</b>   | Janus kinase and microtubule interacting protein 3             | 282973 |
|  |  | <b>SNORA57</b>   | small nucleolar RNA, H/ACA box 57                              | 692158 |
|  |  | <b>CDS2</b>      | CDP-diacylglycerol synthase (phosphatidate cytidyltransferase) | 8760   |
|  |  | <b>CARKD</b>     | carbohydrate kinase domain containing                          | 55739  |
|  |  | <b>IARS2</b>     | isoleucyl-tRNA synthetase 2, mitochondrial                     | 55699  |
|  |  | <b>MRPL23</b>    | mitochondrial ribosomal protein L23                            | 6150   |
|  |  | <b>LINGO2</b>    | leucine rich repeat and Ig domain containing 2                 | 158038 |
|  |  | <b>STUB1</b>     | STIP1 homology and U-box containing protein 1                  | 10273  |
|  |  | <b>PABPC1</b>    | poly(A) binding protein, cytoplasmic 1                         | 26986  |
|  |  | <b>MYOM3</b>     | myomesin family, member 3                                      | 127294 |
|  |  | <b>HNRNPUL2</b>  | heterogeneous nuclear ribonucleoprotein U-like 2               | 221092 |
|  |  | <b>ADAM17</b>    | ADAM metallopeptidase domain 17                                | 6868   |
|  |  | <b>RPSA</b>      | ribosomal protein SA                                           | 3921   |
|  |  | <b>DPM3</b>      | dolichyl-phosphate mannosyltransferase polypeptide 3           | 54344  |
|  |  | <b>VAMP1</b>     | vesicle-associated membrane protein 1 (synaptobrevin 1)        | 6843   |
|  |  | <b>GPR27</b>     | G protein-coupled receptor 27                                  | 2850   |
|  |  | <b>METAP1</b>    | methionyl aminopeptidase 1                                     | 23173  |
|  |  | <b>ANKRD54</b>   | ankyrin repeat domain 54                                       | 129138 |
|  |  | <b>ZC3HAV1L</b>  | zinc finger CCCH-type, antiviral 1-like                        | 92092  |
|  |  | <b>OXA1L</b>     | oxidase (cytochrome c) assembly 1-like                         | 5018   |
|  |  | <b>MCM2</b>      | minichromosome maintenance complex component 2                 | 4171   |
|  |  | <b>RRAGA</b>     | Ras-related GTP binding A                                      | 10670  |
|  |  | <b>RPL24</b>     | ribosomal protein L24                                          | 6152   |
|  |  | <b>ELN</b>       | elastin                                                        | 2006   |
|  |  | <b>NAT12</b>     | N-acetyltransferase 12 (GCN5-related, putative)                | 122830 |
|  |  | <b>DYNC1H1</b>   | dynein, cytoplasmic 1, heavy chain 1                           | 1778   |
|  |  | <b>KCP</b>       | kielin/chordin-like protein                                    | 375616 |
|  |  | <b>DNMT3A</b>    | DNA (cytosine-5-)-methyltransferase 3 alpha                    | 1788   |
|  |  | <b>GNAS</b>      | GNAS complex locus                                             | 2778   |
|  |  | <b>SDHA</b>      | succinate dehydrogenase complex, subunit A, flavoprotein       | 6389   |
|  |  | <b>ST13</b>      | suppression of tumorigenicity 13 (colon carcinoma) (Hsp70)     | 6767   |
|  |  | <b>C14orf109</b> | chromosome 14 open reading frame 109                           | 26175  |
|  |  | <b>PDIA6</b>     | protein disulfide isomerase family A, member 6                 | 10130  |
|  |  | <b>DAP</b>       | death-associated protein                                       | 1611   |
|  |  | <b>FXR1</b>      | fragile X mental retardation, autosomal homolog 1              | 8087   |
|  |  | <b>NKX2-5</b>    | NK2 transcription factor related, locus 5 (Drosophila)         | 1482   |
|  |  | <b>SDHALP1</b>   | succinate dehydrogenase complex, subunit A, flavoprotein       | 255812 |
|  |  | <b>PCNX</b>      | pecanex homolog (Drosophila)                                   | 22990  |
|  |  | <b>YY1</b>       | YY1 transcription factor                                       | 7528   |

|     |                 |                                                             |        |
|-----|-----------------|-------------------------------------------------------------|--------|
| II  | <b>ATP6V0E1</b> | ATPase, H+ transporting, lysosomal 9kDa, V0 subunit e1      | 8992   |
| II  | <b>ARHGEF11</b> | Rho guanine nucleotide exchange factor (GEF) 11             | 9826   |
| III | <b>TMBIM6</b>   | transmembrane BAX inhibitor motif containing 6              | 7009   |
| III | <b>LITAF</b>    | lipopolysaccharide-induced TNF factor                       | 9516   |
| III | <b>RPL4</b>     | ribosomal protein L4                                        | 6124   |
| III | <b>GNS</b>      | glucosamine (N-acetyl)-6-sulfatase                          | 2799   |
| III | <b>SPIN1</b>    | spindlin 1                                                  | 10927  |
| III | <b>ADAMTS6</b>  | ADAM metalloproteinase with thrombospondin type 1 mot       | 11174  |
| III | <b>ABCA10</b>   | ATP-binding cassette, sub-family A (ABC1), member 10        | 10349  |
| III | <b>SPG21</b>    | spastic paraplegia 21 (autosomal recessive, Mast syndrom    | 51324  |
| III | <b>PRPF40A</b>  | PRP40 pre-mRNA processing factor 40 homolog A (S. cerev     | 55660  |
| III | <b>TRIM37</b>   | tripartite motif-containing 37                              | 4591   |
| III | <b>ZZZ3</b>     | zinc finger, ZZ-type containing 3                           | 26009  |
| III | <b>ACVR2B</b>   | activin A receptor, type IIB                                | 93     |
| III | <b>UBE3B</b>    | ubiquitin protein ligase E3B                                | 89910  |
| III | <b>SNX19</b>    | sorting nexin 19                                            | 399979 |
| III | <b>SHOC2</b>    | soc-2 suppressor of clear homolog (C. elegans)              | 8036   |
| III | <b>DDX59</b>    | DEAD (Asp-Glu-Ala-Asp) box polypeptide 59                   | 83479  |
| III | <b>ATF6</b>     | activating transcription factor 6                           | 22926  |
| III | <b>C12orf49</b> | chromosome 12 open reading frame 49                         | 79794  |
| III | <b>ACBD3</b>    | acyl-Coenzyme A binding domain containing 3                 | 64746  |
| III | <b>RAP2B</b>    | RAP2B, member of RAS oncogene family                        | 5912   |
| III | <b>BSG</b>      | basigin (Ok blood group)                                    | 682    |
| III | <b>LIPA</b>     | lipase A, lysosomal acid, cholesterol esterase              | 3988   |
| III | <b>C5orf15</b>  | chromosome 5 open reading frame 15                          | 56951  |
| III | <b>UBR2</b>     | ubiquitin protein ligase E3 component n-recognin 2          | 23304  |
| III | <b>RFX1</b>     | regulatory factor X, 1 (influences HLA class II expression) | 5989   |
| III | <b>C10orf28</b> | chromosome 10 open reading frame 28                         | 27291  |
| III | <b>RPA2</b>     | replication protein A2, 32kDa                               | 6118   |
| III | <b>PRPF18</b>   | PRP18 pre-mRNA processing factor 18 homolog (S. cerevis     | 8559   |
| III | <b>SMG7</b>     | Smg-7 homolog, nonsense mediated mRNA decay factor (C       | 9887   |
| III | <b>SSH2</b>     | slingshot homolog 2 (Drosophila)                            | 85464  |
| III | <b>GPBP1L1</b>  | GC-rich promoter binding protein 1-like 1                   | 60313  |
| III | <b>HPS5</b>     | Hermansky-Pudlak syndrome 5                                 | 11234  |
| III | <b>RAB3IP</b>   | RAB3A interacting protein (rabin3)                          | 117177 |
| III | <b>BRI3</b>     | brain protein I3                                            | 25798  |
| III | <b>TMCC1</b>    | transmembrane and coiled-coil domain family 1               | 23023  |
| III | <b>AP3B1</b>    | adaptor-related protein complex 3, beta 1 subunit           | 8546   |
| III | <b>FAM48A</b>   | family with sequence similarity 48, member A                | 55578  |
| III | <b>HMGN4</b>    | high mobility group nucleosomal binding domain 4            | 10473  |
| III | <b>S100A11</b>  | S100 calcium binding protein A11                            | 6282   |



|  |                 |                                                              |        |
|--|-----------------|--------------------------------------------------------------|--------|
|  | <b>POU2F1</b>   | POU class 2 homeobox 1                                       | 5451   |
|  | <b>FAM21A</b>   | family with sequence similarity 21, member A                 | 387680 |
|  | <b>CHP</b>      | calcium binding protein P22                                  | 11261  |
|  | <b>ITGB1</b>    | integrin, beta 1 (fibronectin receptor, beta polypeptide, an | 3688   |
|  | <b>PIK3CA</b>   | phosphoinositide-3-kinase, catalytic, alpha polypeptide      | 5290   |
|  | <b>DNAJC14</b>  | DnaJ (Hsp40) homolog, subfamily C, member 14                 | 85406  |
|  | <b>RARS2</b>    | arginyl-tRNA synthetase 2, mitochondrial                     | 57038  |
|  | <b>MBOAT7</b>   | membrane bound O-acyltransferase domain containing 7         | 79143  |
|  | <b>CLDN12</b>   | claudin 12                                                   | 9069   |
|  | <b>NOS1AP</b>   | nitric oxide synthase 1 (neuronal) adaptor protein           | 9722   |
|  | <b>NUDT5</b>    | nudix (nucleoside diphosphate linked moiety X)-type moti     | 11164  |
|  | <b>GMDS</b>     | GDP-mannose 4,6-dehydratase                                  | 2762   |
|  | <b>TROVE2</b>   | TROVE domain family, member 2                                | 6738   |
|  | <b>PPWD1</b>    | peptidylprolyl isomerase domain and WD repeat containin      | 23398  |
|  | <b>GPX4</b>     | glutathione peroxidase 4 (phospholipid hydroperoxidase)      | 2879   |
|  | <b>HIPK3</b>    | homeodomain interacting protein kinase 3                     | 10114  |
|  | <b>C15orf44</b> | chromosome 15 open reading frame 44                          | 81556  |
|  | <b>C1orf9</b>   | chromosome 1 open reading frame 9                            | 51430  |
|  | <b>CNOT2</b>    | CCR4-NOT transcription complex, subunit 2                    | 4848   |
|  | <b>THAP10</b>   | THAP domain containing 10                                    | 56906  |
|  | <b>HIRA</b>     | HIR histone cell cycle regulation defective homolog A (S. ce | 7290   |
|  | <b>FBXO38</b>   | F-box protein 38                                             | 81545  |
|  | <b>AKAP13</b>   | A kinase (PRKA) anchor protein 13                            | 11214  |
|  | <b>C6orf115</b> | chromosome 6 open reading frame 115                          | 58527  |
|  | <b>FUCA2</b>    | fucosidase, alpha-L- 2, plasma                               | 2519   |
|  | <b>TARSL2</b>   | threonyl-tRNA synthetase-like 2                              | 123283 |
|  | <b>USP20</b>    | ubiquitin specific peptidase 20                              | 10868  |
|  | <b>KIAA0415</b> | KIAA0415                                                     | 9907   |
|  | <b>SAR1A</b>    | SAR1 homolog A (S. cerevisiae)                               | 56681  |
|  | <b>SLC25A46</b> | solute carrier family 25, member 46                          | 91137  |
|  | <b>FBXW2</b>    | F-box and WD repeat domain containing 2                      | 26190  |
|  | <b>OSBPL6</b>   | oxysterol binding protein-like 6                             | 114880 |
|  | <b>GAPVD1</b>   | GTPase activating protein and VPS9 domains 1                 | 26130  |
|  | <b>TRIM33</b>   | tripartite motif-containing 33                               | 51592  |
|  | <b>FAM21C</b>   | family with sequence similarity 21, member C                 | 253725 |
|  | <b>TSG101</b>   | tumor susceptibility gene 101                                | 7251   |
|  | <b>CCND3</b>    | cyclin D3                                                    | 896    |
|  | <b>PAPOLG</b>   | poly(A) polymerase gamma                                     | 64895  |
|  | <b>FAM81A</b>   | family with sequence similarity 81, member A                 | 145773 |
|  | <b>USP21</b>    | ubiquitin specific peptidase 21                              | 27005  |
|  | <b>MSRA</b>     | methionine sulfoxide reductase A                             | 4482   |

|  |          |                                                                                    |        |
|--|----------|------------------------------------------------------------------------------------|--------|
|  | LIMS1    | LIM and senescent cell antigen-like domains 1                                      | 3987   |
|  | LIMS1    | LIM and senescent cell antigen-like domains 1                                      | 3987   |
|  | RNF145   | ring finger protein 145                                                            | 153830 |
|  | RBBP5    | retinoblastoma binding protein 5                                                   | 5929   |
|  | RAB18    | RAB18, member RAS oncogene family                                                  | 22931  |
|  | SF4      | splicing factor 4                                                                  | 57794  |
|  | SEC22B   | SEC22 vesicle trafficking protein homolog B ( <i>S. cerevisiae</i> )               | 9554   |
|  | KIAA0892 | KIAA0892                                                                           | 23383  |
|  | MFSD9    | major facilitator superfamily domain containing 9                                  | 84804  |
|  | OTUD7B   | OTU domain containing 7B                                                           | 56957  |
|  | C10orf84 | chromosome 10 open reading frame 84                                                | 63877  |
|  | FAM21B   | family with sequence similarity 21, member B                                       | 55747  |
|  | TMEM9B   | TMEM9 domain family, member B                                                      | 56674  |
|  | CLASP1   | cytoplasmic linker associated protein 1                                            | 23332  |
|  | TMCC3    | transmembrane and coiled-coil domain family 3                                      | 57458  |
|  | TP53     | tumor protein p53                                                                  | 7157   |
|  | SFRS18   | splicing factor, arginine/serine-rich 18                                           | 25957  |
|  | MTRF1L   | mitochondrial translational release factor 1-like                                  | 54516  |
|  | CDC2L5   | cell division cycle 2-like 5 (cholinesterase-related cell division cycle 2-like 5) | 8621   |
|  | GOLGA2L1 | golgi autoantigen, golgin subfamily a, 2-like 1                                    | 55592  |
|  | NDEL1    | nudE nuclear distribution gene E homolog ( <i>A. nidulans</i> )-like               | 81565  |
|  | C11orf57 | chromosome 11 open reading frame 57                                                | 55216  |
|  | SCAMP2   | secretory carrier membrane protein 2                                               | 10066  |
|  | MESDC2   | mesoderm development candidate 2                                                   | 23184  |
|  | CIB1     | calcium and integrin binding 1 (calmyrin)                                          | 10519  |
|  | PSD4     | pleckstrin and Sec7 domain containing 4                                            | 23550  |
|  | BBX      | bobby sox homolog ( <i>Drosophila</i> )                                            | 56987  |
|  | ZDHHC13  | zinc finger, DHHC-type containing 13                                               | 54503  |
|  | ABI1     | abl-interactor 1                                                                   | 10006  |
|  | CNP      | 2',3'-cyclic nucleotide 3' phosphodiesterase                                       | 1267   |
|  | SORCS2   | sortilin-related VPS10 domain containing receptor 2                                | 57537  |
|  | MGEA5    | meningioma expressed antigen 5 (hyaluronidase)                                     | 10724  |
|  | KIAA1310 | KIAA1310                                                                           | 55683  |
|  | ACBD5    | acyl-Coenzyme A binding domain containing 5                                        | 91452  |
|  | PKN2     | protein kinase N2                                                                  | 5586   |
|  | CTTN     | cortactin                                                                          | 2017   |
|  | POGZ     | pogo transposable element with ZNF domain                                          | 23126  |
|  | ZHX1     | zinc fingers and homeoboxes 1                                                      | 11244  |
|  | HERC1    | hect (homologous to the E6-AP (UBE3A) carboxyl terminus)                           | 8925   |
|  | TNKS2    | tankyrase, TRF1-interacting ankyrin-related ADP-ribose polymerase 2                | 80351  |
|  | ASCC3    | activating signal cointegrator 1 complex subunit 3                                 | 10973  |

|  |                 |                                                             |        |
|--|-----------------|-------------------------------------------------------------|--------|
|  | <b>YIPF1</b>    | Yip1 domain family, member 1                                | 54432  |
|  | <b>KIAA0652</b> | KIAA0652                                                    | 9776   |
|  | <b>TMEM181</b>  | transmembrane protein 181                                   | 57583  |
|  | <b>SLC39A1</b>  | solute carrier family 39 (zinc transporter), member 1       | 27173  |
|  | <b>KCTD10</b>   | potassium channel tetramerisation domain containing 10      | 83892  |
|  | <b>C5orf44</b>  | chromosome 5 open reading frame 44                          | 80006  |
|  | <b>SNUPN</b>    | snurportin 1                                                | 10073  |
|  | <b>LYSMD3</b>   | LysM, putative peptidoglycan-binding, domain containing     | 116068 |
|  | <b>MTMR6</b>    | myotubularin related protein 6                              | 9107   |
|  | <b>VTI1A</b>    | vesicle transport through interaction with t-SNAREs homo    | 143187 |
|  | <b>CARD8</b>    | caspase recruitment domain family, member 8                 | 22900  |
|  | <b>PDE4DIP</b>  | phosphodiesterase 4D interacting protein                    | 9659   |
|  | <b>PTPN9</b>    | protein tyrosine phosphatase, non-receptor type 9           | 5780   |
|  | <b>SCRN1</b>    | secernin 1                                                  | 9805   |
|  | <b>THEG</b>     | Theg homolog (mouse)                                        | 51298  |
|  | <b>COPS2</b>    | COP9 constitutive photomorphogenic homolog subunit 2 (      | 9318   |
|  | <b>SH3TC1</b>   | SH3 domain and tetratricopeptide repeats 1                  | 54436  |
|  | <b>TBPL1</b>    | TBP-like 1                                                  | 9519   |
|  | <b>TOM1L2</b>   | target of myb1-like 2 (chicken)                             | 146691 |
|  | <b>MDFI</b>     | MyoD family inhibitor                                       | 4188   |
|  | <b>TMEM87A</b>  | transmembrane protein 87A                                   | 25963  |
|  | <b>SMCR8</b>    | Smith-Magenis syndrome chromosome region, candidate         | 140775 |
|  | <b>NAB2</b>     | NGFI-A binding protein 2 (EGR1 binding protein 2)           | 4665   |
|  | <b>IMPA1</b>    | inositol(myo)-1(or 4)-monophosphatase 1                     | 3612   |
|  | <b>GIT2</b>     | G protein-coupled receptor kinase interacting ArfGAP 2      | 9815   |
|  | <b>DUT</b>      | deoxyuridine triphosphatase                                 | 1854   |
|  | <b>NPTN</b>     | neuroplastin                                                | 27020  |
|  | <b>ZDHHC7</b>   | zinc finger, DHHC-type containing 7                         | 55625  |
|  | <b>TMC6</b>     | transmembrane channel-like 6                                | 11322  |
|  | <b>RPS6KC1</b>  | ribosomal protein S6 kinase, 52kDa, polypeptide 1           | 26750  |
|  | <b>GYLTL1B</b>  | glycosyltransferase-like 1B                                 | 120071 |
|  | <b>TBCC</b>     | tubulin folding cofactor C                                  | 6903   |
|  | <b>KIAA0101</b> | KIAA0101                                                    | 9768   |
|  | <b>CTBP2</b>    | C-terminal binding protein 2                                | 1488   |
|  | <b>RAB11A</b>   | RAB11A, member RAS oncogene family                          | 8766   |
|  | <b>MICAL2</b>   | MICAL-like 2                                                | 79778  |
|  | <b>RAC1</b>     | ras-related C3 botulinum toxin substrate 1 (rho family, sma | 5879   |
|  | <b>ULK3</b>     | unc-51-like kinase 3 (C. elegans)                           | 25989  |
|  | <b>CD151</b>    | CD151 molecule (Raph blood group)                           | 977    |
|  | <b>SH2B3</b>    | SH2B adaptor protein 3                                      | 10019  |
|  | <b>CNN2</b>     | calponin 2                                                  | 1265   |

|  |                 |                                                              |        |
|--|-----------------|--------------------------------------------------------------|--------|
|  | <b>RASGRF1</b>  | Ras protein-specific guanine nucleotide-releasing factor 1   | 5923   |
|  | <b>PLA2G4C</b>  | phospholipase A2, group IVC (cytosolic, calcium-independ     | 8605   |
|  | <b>SEC11A</b>   | SEC11 homolog A ( <i>S. cerevisiae</i> )                     | 23478  |
|  | <b>DDA1</b>     | DET1 and DDB1 associated 1                                   | 79016  |
|  | <b>FBXO18</b>   | F-box protein, helicase, 18                                  | 84893  |
|  | <b>FAM111A</b>  | family with sequence similarity 111, member A                | 63901  |
|  | <b>C7orf25</b>  | chromosome 7 open reading frame 25                           | 79020  |
|  | <b>CCNDBP1</b>  | cyclin D-type binding-protein 1                              | 23582  |
|  | <b>SH3PXD2A</b> | SH3 and PX domains 2A                                        | 9644   |
|  | <b>C10orf12</b> | chromosome 10 open reading frame 12                          | 26148  |
|  | <b>MIER1</b>    | mesoderm induction early response 1 homolog ( <i>Xenopus</i> | 57708  |
|  | <b>KIF13A</b>   | kinesin family member 13A                                    | 63971  |
|  | <b>CDH3</b>     | cadherin 3, type 1, P-cadherin (placental)                   | 1001   |
|  | <b>KCNJ15</b>   | potassium inwardly-rectifying channel, subfamily J, memb     | 3772   |
|  | <b>AKIRIN2</b>  | akirin 2                                                     | 55122  |
|  | <b>FAM53B</b>   | family with sequence similarity 53, member B                 | 9679   |
|  | <b>ENDOD1</b>   | endonuclease domain containing 1                             | 23052  |
|  | <b>C6orf167</b> | chromosome 6 open reading frame 167                          | 253714 |
|  | <b>MLLT10</b>   | myeloid/lymphoid or mixed-lineage leukemia (trithorax ho     | 8028   |
|  | <b>ABCA7</b>    | ATP-binding cassette, sub-family A (ABC1), member 7          | 10347  |
|  | <b>WDFY3</b>    | WD repeat and FYVE domain containing 3                       | 23001  |
|  | <b>MAT2B</b>    | methionine adenosyltransferase II, beta                      | 27430  |
|  | <b>RNF146</b>   | ring finger protein 146                                      | 81847  |
|  | <b>PHF19</b>    | PHD finger protein 19                                        | 26147  |
|  | <b>UBE2B</b>    | ubiquitin-conjugating enzyme E2B (RAD6 homolog)              | 7320   |
|  | <b>NAPA</b>     | N-ethylmaleimide-sensitive factor attachment protein, alp    | 8775   |
|  | <b>SLC26A11</b> | solute carrier family 26, member 11                          | 284129 |
|  | <b>MFAP3</b>    | microfibrillar-associated protein 3                          | 4238   |
|  | <b>FAM160B1</b> | family with sequence similarity 160, member B1               | 57700  |
|  | <b>NOD1</b>     | nucleotide-binding oligomerization domain containing 1       | 10392  |
|  | <b>HDGFRP3</b>  | hepatoma-derived growth factor, related protein 3            | 50810  |
|  | <b>SLC38A2</b>  | solute carrier family 38, member 2                           | 54407  |
|  | <b>C9orf21</b>  | chromosome 9 open reading frame 21                           | 195827 |
|  | <b>RBM34</b>    | RNA binding motif protein 34                                 | 23029  |
|  | <b>AGPAT1</b>   | 1-acylglycerol-3-phosphate O-acyltransferase 1 (lysospho     | 10554  |
|  | <b>AGPAT1</b>   | 1-acylglycerol-3-phosphate O-acyltransferase 1 (lysospho     | 10554  |
|  | <b>AGPAT1</b>   | 1-acylglycerol-3-phosphate O-acyltransferase 1 (lysospho     | 10554  |
|  | <b>REV1</b>     | REV1 homolog ( <i>S. cerevisiae</i> )                        | 51455  |
|  | <b>DYX1C1</b>   | dyslexia susceptibility 1 candidate 1                        | 161582 |
|  | <b>MYLK4</b>    | myosin light chain kinase family, member 4                   | 340156 |
|  | <b>KIAA1609</b> | KIAA1609                                                     | 57707  |

|  |                  |                                                            |        |
|--|------------------|------------------------------------------------------------|--------|
|  | <b>PSMC3IP</b>   | PSMC3 interacting protein                                  | 29893  |
|  | <b>PRKCE</b>     | protein kinase C, epsilon                                  | 5581   |
|  | <b>AP3S2</b>     | adaptor-related protein complex 3, sigma 2 subunit         | 10239  |
|  | <b>GPBP1</b>     | GC-rich promoter binding protein 1                         | 65056  |
|  | <b>SFRS12IP1</b> | SFRS12-interacting protein 1                               | 285672 |
|  | <b>CLPX</b>      | ClpX caseinolytic peptidase X homolog (E. coli)            | 10845  |
|  | <b>USF1</b>      | upstream transcription factor 1                            | 7391   |
|  | <b>MIDN</b>      | midnolin                                                   | 90007  |
|  | <b>TNFSF9</b>    | tumor necrosis factor (ligand) superfamily, member 9       | 8744   |
|  | <b>EDARADD</b>   | EDAR-associated death domain                               | 128178 |
|  | <b>NET1</b>      | neuroepithelial cell transforming 1                        | 10276  |
|  | <b>MAPKBP1</b>   | mitogen-activated protein kinase binding protein 1         | 23005  |
|  | <b>CTSA</b>      | cathepsin A                                                | 5476   |
|  | <b>SPTAN1</b>    | spectrin, alpha, non-erythrocytic 1 (alpha-fodrin)         | 6709   |
|  | <b>SETX</b>      | senataxin                                                  | 23064  |
|  | <b>NCOA4</b>     | nuclear receptor coactivator 4                             | 8031   |
|  | <b>ZCCHC8</b>    | zinc finger, CCHC domain containing 8                      | 55596  |
|  | <b>DNAJC1</b>    | DnaJ (Hsp40) homolog, subfamily C, member 1                | 64215  |
|  | <b>CHRNA5</b>    | cholinergic receptor, nicotinic, alpha 5                   | 1138   |
|  | <b>TRIB1</b>     | tribbles homolog 1 (Drosophila)                            | 10221  |
|  | <b>ATF1</b>      | activating transcription factor 1                          | 466    |
|  | <b>TMF1</b>      | TATA element modulatory factor 1                           | 7110   |
|  | <b>NPAT</b>      | nuclear protein, ataxia-telangiectasia locus               | 4863   |
|  | <b>KIAA1009</b>  | KIAA1009                                                   | 22832  |
|  | <b>U2AF1L4</b>   | U2 small nuclear RNA auxiliary factor 1-like 4             | 199746 |
|  | <b>ZNF280D</b>   | zinc finger protein 280D                                   | 54816  |
|  | <b>GBA2</b>      | glucosidase, beta (bile acid) 2                            | 57704  |
|  | <b>KDM2A</b>     | lysine (K)-specific demethylase 2A                         | 22992  |
|  | <b>NFAT5</b>     | nuclear factor of activated T-cells 5, tonicity-responsive | 10725  |
|  | <b>ABLIM1</b>    | actin binding LIM protein 1                                | 3983   |
|  | <b>SH3GL1</b>    | SH3-domain GRB2-like 1                                     | 6455   |
|  | <b>C6orf106</b>  | chromosome 6 open reading frame 106                        | 64771  |
|  | <b>MAP3K6</b>    | mitogen-activated protein kinase kinase kinase 6           | 9064   |
|  | <b>ZNF107</b>    | zinc finger protein 107                                    | 51427  |
|  | <b>FCHO2</b>     | FCH domain only 2                                          | 115548 |
|  | <b>LAMA1</b>     | laminin, alpha 1                                           | 284217 |
|  | <b>DTL</b>       | denticleless homolog (Drosophila)                          | 51514  |
|  | <b>USP42</b>     | ubiquitin specific peptidase 42                            | 84132  |
|  | <b>CD164</b>     | CD164 molecule, sialomucin                                 | 8763   |
|  | <b>C5orf22</b>   | chromosome 5 open reading frame 22                         | 55322  |
|  | <b>OSBPL3</b>    | oxysterol binding protein-like 3                           | 26031  |

|  |                 |                                                                   |        |
|--|-----------------|-------------------------------------------------------------------|--------|
|  | <b>SDCCAG8</b>  | serologically defined colon cancer antigen 8                      | 10806  |
|  | <b>USP31</b>    | ubiquitin specific peptidase 31                                   | 57478  |
|  | <b>RELL1</b>    | RELT-like 1                                                       | 768211 |
|  | <b>ARHGEF2</b>  | Rho/Rac guanine nucleotide exchange factor (GEF) 2                | 9181   |
|  | <b>ARIH1</b>    | ariadne homolog, ubiquitin-conjugating enzyme E2 binding          | 25820  |
|  | <b>C9orf102</b> | chromosome 9 open reading frame 102                               | 375748 |
|  | <b>FER</b>      | fer (fps/fes related) tyrosine kinase                             | 2241   |
|  | <b>RAB43</b>    | RAB43, member RAS oncogene family                                 | 339122 |
|  | <b>SRPK2</b>    | SFRS protein kinase 2                                             | 6733   |
|  | <b>ZSCAN20</b>  | zinc finger and SCAN domain containing 20                         | 7579   |
|  | <b>C3orf38</b>  | chromosome 3 open reading frame 38                                | 285237 |
|  | <b>DMXL1</b>    | Dmx-like 1                                                        | 1657   |
|  | <b>SNX13</b>    | sorting nexin 13                                                  | 23161  |
|  | <b>LNPEP</b>    | leucyl/cystinyl aminopeptidase                                    | 4012   |
|  | <b>C10orf26</b> | chromosome 10 open reading frame 26                               | 54838  |
|  | <b>NFIA</b>     | nuclear factor I/A                                                | 4774   |
|  | <b>RAB31</b>    | RAB31, member RAS oncogene family                                 | 11031  |
|  | <b>MPZL3</b>    | myelin protein zero-like 3                                        | 196264 |
|  | <b>SPTBN1</b>   | spectrin, beta, non-erythrocytic 1                                | 6711   |
|  | <b>BCO2</b>     | beta-carotene oxygenase 2                                         | 83875  |
|  | <b>MECOM</b>    | MDS1 and EVI1 complex locus                                       | 2122   |
|  | <b>GIGYF2</b>   | GRB10 interacting GYF protein 2                                   | 26058  |
|  | <b>MRPS11</b>   | mitochondrial ribosomal protein S11                               | 64963  |
|  | <b>C2orf55</b>  | chromosome 2 open reading frame 55                                | 343990 |
|  | <b>RTKN2</b>    | rhotekin 2                                                        | 219790 |
|  | <b>CDC42BPA</b> | CDC42 binding protein kinase alpha (DMPK-like)                    | 8476   |
|  | <b>C5orf34</b>  | chromosome 5 open reading frame 34                                | 375444 |
|  | <b>ARHGAP1</b>  | Rho GTPase activating protein 1                                   | 392    |
|  | <b>CCDC90B</b>  | coiled-coil domain containing 90B                                 | 60492  |
|  | <b>GCNT2</b>    | glucosaminyl (N-acetyl) transferase 2, I-branching enzyme         | 2651   |
|  | <b>GNG10</b>    | guanine nucleotide binding protein (G protein), gamma 10          | 2790   |
|  | <b>GTF2B</b>    | general transcription factor IIB                                  | 2959   |
|  | <b>SCNM1</b>    | sodium channel modifier 1                                         | 79005  |
|  | <b>MYOF</b>     | myoferlin                                                         | 26509  |
|  | <b>FAM178A</b>  | family with sequence similarity 178, member A                     | 55719  |
|  | <b>RIC3</b>     | resistance to inhibitors of cholinesterase 3 homolog (C. elegans) | 79608  |
|  | <b>CWF19L2</b>  | CWF19-like 2, cell cycle control (S. pombe)                       | 143884 |
|  | <b>CCNJL</b>    | cyclin J-like                                                     | 79616  |
|  | <b>DENND4A</b>  | DENN/MADD domain containing 4A                                    | 10260  |
|  | <b>KLF12</b>    | Kruppel-like factor 12                                            | 11278  |
|  | <b>YAF2</b>     | YY1 associated factor 2                                           | 10138  |

|  |                  |                                                              |        |
|--|------------------|--------------------------------------------------------------|--------|
|  | <b>FLJ22167</b>  | hypothetical protein FLJ22167                                | 79583  |
|  | <b>MEF2D</b>     | myocyte enhancer factor 2D                                   | 4209   |
|  | <b>ARL13B</b>    | ADP-ribosylation factor-like 13B                             | 200894 |
|  | <b>PCK2</b>      | PCTAIRE protein kinase 2                                     | 5128   |
|  | <b>SMCHD1</b>    | structural maintenance of chromosomes flexible hinge do      | 23347  |
|  | <b>FAM103A1</b>  | family with sequence similarity 103, member A1               | 83640  |
|  | <b>MTRF1L</b>    | mitochondrial translational release factor 1-like            | 54516  |
|  | <b>C10orf88</b>  | chromosome 10 open reading frame 88                          | 80007  |
|  | <b>PNPLA8</b>    | patatin-like phospholipase domain containing 8               | 50640  |
|  | <b>GBF1</b>      | golgi-specific brefeldin A resistant guanine nucleotide exch | 8729   |
|  | <b>IQCK</b>      | IQ motif containing K                                        | 124152 |
|  | <b>OXR1</b>      | oxidation resistance 1                                       | 55074  |
|  | <b>C1orf27</b>   | chromosome 1 open reading frame 27                           | 54953  |
|  | <b>C6orf70</b>   | chromosome 6 open reading frame 70                           | 55780  |
|  | <b>COL17A1</b>   | collagen, type XVII, alpha 1                                 | 1308   |
|  | <b>ENG</b>       | endoglin                                                     | 2022   |
|  | <b>TAPBPL</b>    | TAP binding protein-like                                     | 55080  |
|  | <b>HINFP</b>     | histone H4 transcription factor                              | 25988  |
|  | <b>LRRC28</b>    | leucine rich repeat containing 28                            | 123355 |
|  | <b>PTPN12</b>    | protein tyrosine phosphatase, non-receptor type 12           | 5782   |
|  | <b>QKI</b>       | quaking homolog, KH domain RNA binding (mouse)               | 9444   |
|  | <b>LCOR</b>      | ligand dependent nuclear receptor corepressor                | 84458  |
|  | <b>FLOT2</b>     | flotillin 2                                                  | 2319   |
|  | <b>C15orf17</b>  | chromosome 15 open reading frame 17                          | 57184  |
|  | <b>PLEKHM1P</b>  | pleckstrin homology domain containing, family M (with RU     | 440456 |
|  | <b>RASA1</b>     | RAS p21 protein activator (GTPase activating protein) 1      | 5921   |
|  | <b>MRPL46</b>    | mitochondrial ribosomal protein L46                          | 26589  |
|  | <b>TLK1</b>      | tousled-like kinase 1                                        | 9874   |
|  | <b>CYBASC3</b>   | cytochrome b, ascorbate dependent 3                          | 220002 |
|  | <b>CTSD</b>      | cathepsin D                                                  | 1509   |
|  | <b>FN1</b>       | fibronectin 1                                                | 2335   |
|  | <b>KIF18A</b>    | kinesin family member 18A                                    | 81930  |
|  | <b>CCDC125</b>   | coiled-coil domain containing 125                            | 202243 |
|  | <b>DYRK3</b>     | dual-specificity tyrosine-(Y)-phosphorylation regulated kin  | 8444   |
|  | <b>IRAK4</b>     | interleukin-1 receptor-associated kinase 4                   | 51135  |
|  | <b>LUZP1</b>     | leucine zipper protein 1                                     | 7798   |
|  | <b>HIST1H2BJ</b> | histone cluster 1, H2bj                                      | 8970   |
|  | <b>IQGAP2</b>    | IQ motif containing GTPase activating protein 2              | 10788  |
|  | <b>ZNF791</b>    | zinc finger protein 791                                      | 163049 |
|  | <b>TXLNA</b>     | taxilin alpha                                                | 200081 |
|  | <b>TCF12</b>     | transcription factor 12                                      | 6938   |



|  |                 |                                                            |        |
|--|-----------------|------------------------------------------------------------|--------|
|  | <b>PHACTR4</b>  | phosphatase and actin regulator 4                          | 65979  |
|  | <b>SRGAP2</b>   | SLIT-ROBO Rho GTPase activating protein 2                  | 23380  |
|  | <b>WASF3</b>    | WAS protein family, member 3                               | 10810  |
|  | <b>STOML1</b>   | stomatin (EPB72)-like 1                                    | 9399   |
|  | <b>STAM</b>     | signal transducing adaptor molecule (SH3 domain and ITA    | 8027   |
|  | <b>SQSTM1</b>   | sequestosome 1                                             | 8878   |
|  | <b>RPP30</b>    | ribonuclease P/MRP 30kDa subunit                           | 10556  |
|  | <b>USP15</b>    | ubiquitin specific peptidase 15                            | 9958   |
|  | <b>SPA17</b>    | sperm autoantigenic protein 17                             | 53340  |
|  | <b>ANKRD42</b>  | ankyrin repeat domain 42                                   | 338699 |
|  | <b>TMEM60</b>   | transmembrane protein 60                                   | 85025  |
|  | <b>KIAA1598</b> | KIAA1598                                                   | 57698  |
|  | <b>MYL9</b>     | myosin, light chain 9, regulatory                          | 10398  |
|  | <b>SASS6</b>    | spindle assembly 6 homolog (C. elegans)                    | 163786 |
|  | <b>GPR56</b>    | G protein-coupled receptor 56                              | 9289   |
|  | <b>RALA</b>     | v-ral simian leukemia viral oncogene homolog A (ras relate | 5898   |
|  | <b>INTS7</b>    | integrator complex subunit 7                               | 25896  |
|  | <b>DMPK</b>     | dystrophia myotonica-protein kinase                        | 1760   |
|  | <b>SIN3A</b>    | SIN3 homolog A, transcription regulator (yeast)            | 25942  |
|  | <b>KLHL21</b>   | kelch-like 21 (Drosophila)                                 | 9903   |
|  | <b>RIN1</b>     | Ras and Rab interactor 1                                   | 9610   |
|  | <b>KIAA0494</b> | KIAA0494                                                   | 9813   |
|  | <b>GNG5</b>     | guanine nucleotide binding protein (G protein), gamma 5    | 2787   |
|  | <b>RB1</b>      | retinoblastoma 1                                           | 5925   |
|  | <b>NUPL1</b>    | nucleoporin like 1                                         | 9818   |
|  | <b>SRGAP2</b>   | SLIT-ROBO Rho GTPase activating protein 2                  | 23380  |
|  | <b>SLC30A7</b>  | solute carrier family 30 (zinc transporter), member 7      | 148867 |
|  | <b>ASB8</b>     | ankyrin repeat and SOCS box-containing 8                   | 140461 |
|  | <b>PACS1</b>    | phosphofurin acidic cluster sorting protein 1              | 55690  |
|  | <b>NARG2</b>    | NMDA receptor regulated 2                                  | 79664  |
|  | <b>PLEKHB2</b>  | pleckstrin homology domain containing, family B (evectins  | 55041  |
|  | <b>FAM103A1</b> | family with sequence similarity 103, member A1             | 83640  |
|  | <b>STX6</b>     | syntaxin 6                                                 | 10228  |
|  | <b>FKBP15</b>   | FK506 binding protein 15, 133kDa                           | 23307  |
|  | <b>ZBTB34</b>   | zinc finger and BTB domain containing 34                   | 403341 |
|  | <b>AES</b>      | amino-terminal enhancer of split                           | 166    |
|  | <b>MAP3K2</b>   | mitogen-activated protein kinase kinase kinase 2           | 10746  |
|  | <b>ANXA1</b>    | annexin A1                                                 | 301    |
|  | <b>KIAA0913</b> | KIAA0913                                                   | 23053  |
|  | <b>TRAF3IP2</b> | TRAF3 interacting protein 2                                | 10758  |
|  | <b>ANXA8</b>    | annexin A8                                                 | 653145 |

|  |                 |                                                             |        |
|--|-----------------|-------------------------------------------------------------|--------|
|  | <b>FAM108C1</b> | family with sequence similarity 108, member C1              | 58489  |
|  | <b>SERAC1</b>   | serine active site containing 1                             | 84947  |
|  | <b>GPR115</b>   | G protein-coupled receptor 115                              | 221393 |
|  | <b>PIAS1</b>    | protein inhibitor of activated STAT, 1                      | 8554   |
|  | <b>TPRG1</b>    | tumor protein p63 regulated 1                               | 285386 |
|  | <b>WSB2</b>     | WD repeat and SOCS box-containing 2                         | 55884  |
|  | <b>ARHGAP26</b> | Rho GTPase activating protein 26                            | 23092  |
|  | <b>POLR3A</b>   | polymerase (RNA) III (DNA directed) polypeptide A, 155kD    | 11128  |
|  | <b>WDR37</b>    | WD repeat domain 37                                         | 22884  |
|  | <b>C9orf102</b> | chromosome 9 open reading frame 102                         | 375748 |
|  | <b>FAM154B</b>  | family with sequence similarity 154, member B               | 283726 |
|  | <b>REV3L</b>    | REV3-like, catalytic subunit of DNA polymerase zeta (yeast) | 5980   |
|  | <b>MTHFS</b>    | 5,10-methenyltetrahydrofolate synthetase (5-formyltetrah    | 10588  |
|  | <b>MESDC1</b>   | mesoderm development candidate 1                            | 59274  |
|  | <b>DBF4B</b>    | DBF4 homolog B ( <i>S. cerevisiae</i> )                     | 80174  |
|  | <b>ZC3H12C</b>  | zinc finger CCCH-type containing 12C                        | 85463  |
|  | <b>SLC35A3</b>  | solute carrier family 35 (UDP-N-acetylglucosamine (UDP-G    | 23443  |
|  | <b>C1orf192</b> | chromosome 1 open reading frame 192                         | 257177 |
|  | <b>SKIL</b>     | SKI-like oncogene                                           | 6498   |
|  | <b>CD2AP</b>    | CD2-associated protein                                      | 23607  |
|  | <b>RGL2</b>     | ral guanine nucleotide dissociation stimulator-like 2       | 5863   |
|  | <b>PHTF1</b>    | putative homeodomain transcription factor 1                 | 10745  |
|  | <b>GALK2</b>    | galactokinase 2                                             | 2585   |
|  | <b>MAN2A1</b>   | mannosidase, alpha, class 2A, member 1                      | 4124   |
|  | <b>MYO1E</b>    | myosin IE                                                   | 4643   |
|  | <b>USP40</b>    | ubiquitin specific peptidase 40                             | 55230  |
|  | <b>ERBB2IP</b>  | erbb2 interacting protein                                   | 55914  |
|  | <b>CYB5R4</b>   | cytochrome b5 reductase 4                                   | 51167  |
|  | <b>CEP170</b>   | centrosomal protein 170kDa                                  | 9859   |
|  | <b>FAH</b>      | fumarylacetoacetate hydrolase (fumarylacetoacetase)         | 2184   |
|  | <b>SHISA5</b>   | shisa homolog 5 ( <i>Xenopus laevis</i> )                   | 51246  |
|  | <b>ANXA8L2</b>  | annexin A8-like 2                                           | 244    |
|  | <b>MYO5C</b>    | myosin VC                                                   | 55930  |
|  | <b>TOR1AIP2</b> | torsin A interacting protein 2                              | 163590 |
|  | <b>FAM122C</b>  | family with sequence similarity 122C                        | 159091 |
|  | <b>CTSB</b>     | cathepsin B                                                 | 1508   |
|  | <b>DHX32</b>    | DEAH (Asp-Glu-Ala-His) box polypeptide 32                   | 55760  |
|  | <b>WDR17</b>    | WD repeat domain 17                                         | 116966 |
|  | <b>CLIP1</b>    | CAP-GLY domain containing linker protein 1                  | 6249   |
|  | <b>C15orf57</b> | chromosome 15 open reading frame 57                         | 90416  |
|  | <b>LZTS2</b>    | leucine zipper, putative tumor suppressor 2                 | 84445  |

|  |                   |                                                            |        |
|--|-------------------|------------------------------------------------------------|--------|
|  | <b>CST3</b>       | cystatin C                                                 | 1471   |
|  | <b>PLCE1</b>      | phospholipase C, epsilon 1                                 | 51196  |
|  | <b>MED8</b>       | mediator complex subunit 8                                 | 112950 |
|  | <b>NFKB1</b>      | nuclear factor of kappa light polypeptide gene enhancer in | 4790   |
|  | <b>THEM4</b>      | thioesterase superfamily member 4                          | 117145 |
|  | <b>MIER2</b>      | mesoderm induction early response 1, family member 2       | 54531  |
|  | <b>ZCCHC2</b>     | zinc finger, CCHC domain containing 2                      | 54877  |
|  | <b>C1GALT1</b>    | core 1 synthase, glycoprotein-N-acetylgalactosamine 3-be   | 56913  |
|  | <b>MBD5</b>       | methyl-CpG binding domain protein 5                        | 55777  |
|  | <b>NSUN5</b>      | NOL1/NOP2/Sun domain family, member 5                      | 55695  |
|  | <b>NUP62CL</b>    | nucleoporin 62kDa C-terminal like                          | 54830  |
|  | <b>ZFAND5</b>     | zinc finger, AN1-type domain 5                             | 7763   |
|  | <b>CSGALNACT2</b> | chondroitin sulfate N-acetylgalactosaminyltransferase 2    | 55454  |
|  | <b>SLC29A3</b>    | solute carrier family 29 (nucleoside transporters), member | 55315  |
|  | <b>ZC3HAV1</b>    | zinc finger CCCH-type, antiviral 1                         | 56829  |
|  | <b>DCBLD1</b>     | discoidin, CUB and LCCL domain containing 1                | 285761 |
|  | <b>FBXO28</b>     | F-box protein 28                                           | 23219  |
|  | <b>STX7</b>       | syntaxin 7                                                 | 8417   |
|  | <b>CRIP2</b>      | cysteine-rich protein 2                                    | 1397   |
|  | <b>UBE2D1</b>     | ubiquitin-conjugating enzyme E2D 1 (UBC4/5 homolog, ye     | 7321   |
|  | <b>CCDC132</b>    | coiled-coil domain containing 132                          | 55610  |
|  | <b>TRAK2</b>      | trafficking protein, kinesin binding 2                     | 66008  |
|  | <b>HIST1H1A</b>   | histone cluster 1, H1a                                     | 3024   |
|  | <b>MDM1</b>       | Mdm1 nuclear protein homolog (mouse)                       | 56890  |
|  | <b>ARPP19</b>     | cAMP-regulated phosphoprotein, 19kDa                       | 10776  |
|  | <b>COX19</b>      | COX19 cytochrome c oxidase assembly homolog (S. cerevis    | 90639  |
|  | <b>CEP152</b>     | centrosomal protein 152kDa                                 | 22995  |
|  | <b>CHD9</b>       | chromodomain helicase DNA binding protein 9                | 80205  |
|  | <b>GRN</b>        | granulin                                                   | 2896   |
|  | <b>ZWILCH</b>     | Zwilch, kinetochore associated, homolog (Drosophila)       | 55055  |
|  | <b>AIDA</b>       | axin interactor, dorsalization associated                  | 64853  |
|  | <b>C10orf46</b>   | chromosome 10 open reading frame 46                        | 143384 |
|  | <b>RBM18</b>      | RNA binding motif protein 18                               | 92400  |
|  | <b>FAM109B</b>    | family with sequence similarity 109, member B              | 150368 |
|  | <b>C9orf68</b>    | chromosome 9 open reading frame 68                         | 55064  |
|  | <b>MYLK</b>       | myosin light chain kinase                                  | 4638   |
|  | <b>SLU7</b>       | SLU7 splicing factor homolog (S. cerevisiae)               | 10569  |
|  | <b>SERINC1</b>    | serine incorporator 1                                      | 57515  |
|  | <b>PXN</b>        | paxillin                                                   | 5829   |
|  | <b>FNIP1</b>      | folliculin interacting protein 1                           | 96459  |
|  | <b>SRGAP2</b>     | SLIT-ROBO Rho GTPase activating protein 2                  | 23380  |

|  |          |                                                              |        |
|--|----------|--------------------------------------------------------------|--------|
|  | HERPUD2  | HERPUD family member 2                                       | 64224  |
|  | TRIP4    | thyroid hormone receptor interactor 4                        | 9325   |
|  | TRPV1    | transient receptor potential cation channel, subfamily V, m  | 7442   |
|  | BRIP1    | BRCA1 interacting protein C-terminal helicase 1              | 83990  |
|  | GCNT1    | glucosaminyl (N-acetyl) transferase 1, core 2 (beta-1,6-N-a  | 2650   |
|  | FUT2     | fucosyltransferase 2 (secretor status included)              | 2524   |
|  | ALS2CL   | ALS2 C-terminal like                                         | 259173 |
|  | REL      | v-rel reticuloendotheliosis viral oncogene homolog (avian)   | 5966   |
|  | ZBTB34   | zinc finger and BTB domain containing 34                     | 403341 |
|  | RPRD2    | regulation of nuclear pre-mRNA domain containing 2           | 23248  |
|  | MITD1    | MIT, microtubule interacting and transport, domain contai    | 129531 |
|  | ZNF618   | zinc finger protein 618                                      | 114991 |
|  | RAET1E   | retinoic acid early transcript 1E                            | 135250 |
|  | ZNF438   | zinc finger protein 438                                      | 220929 |
|  | ADPGK    | ADP-dependent glucokinase                                    | 83440  |
|  | C1orf106 | chromosome 1 open reading frame 106                          | 55765  |
|  | FTSJD2   | FtsJ methyltransferase domain containing 2                   | 23070  |
|  | ITGA4    | integrin, alpha 4 (antigen CD49D, alpha 4 subunit of VLA-4   | 3676   |
|  | CKAP2    | cytoskeleton associated protein 2                            | 26586  |
|  | STK38    | serine/threonine kinase 38                                   | 11329  |
|  | ZNF292   | zinc finger protein 292                                      | 23036  |
|  | E2F8     | E2F transcription factor 8                                   | 79733  |
|  | C6orf150 | chromosome 6 open reading frame 150                          | 115004 |
|  | CNKSR1   | connector enhancer of kinase suppressor of Ras 1             | 10256  |
|  | CCDC82   | coiled-coil domain containing 82                             | 79780  |
|  | MYO6     | myosin VI                                                    | 4646   |
|  | SCYL2    | SCY1-like 2 ( <i>S. cerevisiae</i> )                         | 55681  |
|  | TSPAN15  | tetraspanin 15                                               | 23555  |
|  | ITPRIP   | inositol 1,4,5-triphosphate receptor interacting protein     | 85450  |
|  | RUFY3    | RUN and FYVE domain containing 3                             | 22902  |
|  | LEO1     | Leo1, Paf1/RNA polymerase II complex component, homo         | 123169 |
|  | PLCD3    | phospholipase C, delta 3                                     | 113026 |
|  | C15orf58 | chromosome 15 open reading frame 58                          | 390637 |
|  | SPIRE2   | spire homolog 2 ( <i>Drosophila</i> )                        | 84501  |
|  | PHLDA2   | pleckstrin homology-like domain, family A, member 2          | 7262   |
|  | TACSTD2  | tumor-associated calcium signal transducer 2                 | 4070   |
|  | PAK6     | p21 protein (Cdc42/Rac)-activated kinase 6                   | 56924  |
|  | SLC6A9   | solute carrier family 6 (neurotransmitter transporter, glyci | 6536   |
|  | ARL5B    | ADP-ribosylation factor-like 5B                              | 221079 |
|  | ZHX2     | zinc fingers and homeoboxes 2                                | 22882  |
|  | SHC1     | SHC (Src homology 2 domain containing) transforming pro      | 6464   |

|  |                  |                                                           |        |
|--|------------------|-----------------------------------------------------------|--------|
|  | <b>FAM126B</b>   | family with sequence similarity 126, member B             | 285172 |
|  | <b>C1orf58</b>   | chromosome 1 open reading frame 58                        | 148362 |
|  | <b>ARAP3</b>     | ArfGAP with RhoGAP domain, ankyrin repeat and PH dom      | 64411  |
|  | <b>RASSF10</b>   | Ras association (RalGDS/AF-6) domain family (N-terminal)  | 644943 |
|  | <b>PSORS1C1</b>  | psoriasis susceptibility 1 candidate 1                    | 170679 |
|  | <b>NHLRC1</b>    | NHL repeat containing 1                                   | 378884 |
|  | <b>C6orf204</b>  | chromosome 6 open reading frame 204                       | 387119 |
|  | <b>JAK1</b>      | Janus kinase 1                                            | 3716   |
|  | <b>HLA-DRB3</b>  | major histocompatibility complex, class II, DR beta 3     | 3125   |
|  | <b>MAML2</b>     | mastermind-like 2 (Drosophila)                            | 84441  |
|  | <b>CRISPLD1</b>  | cysteine-rich secretory protein LCCL domain containing 1  | 83690  |
|  | <b>ANXA8L1</b>   | annexin A8-like 1                                         | 728113 |
|  | <b>VANGL1</b>    | vang-like 1 (van gogh, Drosophila)                        | 81839  |
|  | <b>FAM111B</b>   | family with sequence similarity 111, member B             | 374393 |
|  | <b>LOC554202</b> | hypothetical LOC554202                                    | 554202 |
|  | <b>DTWD1</b>     | DTW domain containing 1                                   | 56986  |
|  | <b>C7orf64</b>   | chromosome 7 open reading frame 64                        | 84060  |
|  | <b>PIP4K2C</b>   | phosphatidylinositol-5-phosphate 4-kinase, type II, gamma | 79837  |
|  | <b>SOAT1</b>     | sterol O-acyltransferase 1                                | 6646   |
|  | <b>BTN2A1</b>    | butyrophilin, subfamily 2, member A1                      | 11120  |
|  | <b>UEVLD</b>     | UEV and lactate/malate dehydrogenase domains              | 55293  |
|  | <b>SNCG</b>      | synuclein, gamma (breast cancer-specific protein 1)       | 6623   |
|  | <b>IL15</b>      | interleukin 15                                            | 3600   |
|  | <b>ALDH3B1</b>   | aldehyde dehydrogenase 3 family, member B1                | 221    |
|  | <b>EPS8</b>      | epidermal growth factor receptor pathway substrate 8      | 2059   |
|  | <b>CYFIP1</b>    | cytoplasmic FMR1 interacting protein 1                    | 23191  |
|  | <b>SEC14L2</b>   | SEC14-like 2 ( <i>S. cerevisiae</i> )                     | 23541  |
|  | <b>SELS</b>      | selenoprotein S                                           | 55829  |
|  | <b>STX2</b>      | syntaxin 2                                                | 2054   |
|  | <b>PLEKHM3</b>   | pleckstrin homology domain containing, family M, membe    | 389072 |
|  | <b>PLEKHM3</b>   | pleckstrin homology domain containing, family M, membe    | 389072 |
|  | <b>TBC1D13</b>   | TBC1 domain family, member 13                             | 54662  |
|  | <b>CEP170</b>    | centrosomal protein 170kDa                                | 9859   |
|  | <b>SLTM</b>      | SAFB-like, transcription modulator                        | 79811  |
|  | <b>TMEM55A</b>   | transmembrane protein 55A                                 | 55529  |
|  | <b>HS3ST1</b>    | heparan sulfate (glucosamine) 3-O-sulfotransferase 1      | 9957   |
|  | <b>CKMT1A</b>    | creatine kinase, mitochondrial 1A                         | 548596 |
|  | <b>CKMT1A</b>    | creatine kinase, mitochondrial 1A                         | 548596 |
|  | <b>FEM1B</b>     | fem-1 homolog b ( <i>C. elegans</i> )                     | 10116  |
|  | <b>TPBG</b>      | trophoblast glycoprotein                                  | 7162   |
|  | <b>PATL1</b>     | protein associated with topoisomerase II homolog 1 (yeast | 219988 |

|  |                 |                                                                |        |
|--|-----------------|----------------------------------------------------------------|--------|
|  | <b>TAX1BP1</b>  | Tax1 (human T-cell leukemia virus type I) binding protein 1    | 8887   |
|  | <b>LGALS8</b>   | lectin, galactoside-binding, soluble, 8                        | 3964   |
|  | <b>UHMK1</b>    | U2AF homology motif (UHM) kinase 1                             | 127933 |
|  | <b>ARID4B</b>   | AT rich interactive domain 4B (RBP1-like)                      | 51742  |
|  | <b>PI4K2A</b>   | phosphatidylinositol 4-kinase type 2 alpha                     | 55361  |
|  | <b>HEXA</b>     | hexosaminidase A (alpha polypeptide)                           | 3073   |
|  | <b>ZSWIM6</b>   | zinc finger, SWIM-type containing 6                            | 57688  |
|  | <b>SMPD1</b>    | sphingomyelin phosphodiesterase 1, acid lysosomal              | 6609   |
|  | <b>RGL2</b>     | ral guanine nucleotide dissociation stimulator-like 2          | 5863   |
|  | <b>RGL2</b>     | ral guanine nucleotide dissociation stimulator-like 2          | 5863   |
|  | <b>MCOLN1</b>   | mucolipin 1                                                    | 57192  |
|  | <b>FANCI</b>    | Fanconi anemia, complementation group I                        | 55215  |
|  | <b>C11orf17</b> | chromosome 11 open reading frame 17                            | 56672  |
|  | <b>CALML4</b>   | calmodulin-like 4                                              | 91860  |
|  | <b>ANKFY1</b>   | ankyrin repeat and FYVE domain containing 1                    | 51479  |
|  | <b>BTBD10</b>   | BTB (POZ) domain containing 10                                 | 84280  |
|  | <b>NT5C2</b>    | 5'-nucleotidase, cytosolic II                                  | 22978  |
|  | <b>C12orf51</b> | chromosome 12 open reading frame 51                            | 283450 |
|  | <b>WDR66</b>    | WD repeat domain 66                                            | 144406 |
|  | <b>LEPR</b>     | leptin receptor                                                | 3953   |
|  | <b>SERTAD2</b>  | SERTA domain containing 2                                      | 9792   |
|  | <b>VPS37B</b>   | vacuolar protein sorting 37 homolog B ( <i>S. cerevisiae</i> ) | 79720  |
|  | <b>KCNAB2</b>   | potassium voltage-gated channel, shaker-related subfamily      | 8514   |
|  | <b>SH3GLB1</b>  | SH3-domain GRB2-like endophilin B1                             | 51100  |
|  | <b>CCDC15</b>   | coiled-coil domain containing 15                               | 80071  |
|  | <b>FIBCD1</b>   | fibrinogen C domain containing 1                               | 84929  |
|  | <b>TOR1AIP1</b> | torsin A interacting protein 1                                 | 26092  |
|  | <b>TRPS1</b>    | trichorhinophalangeal syndrome I                               | 7227   |
|  | <b>CYTSB</b>    | cytospin B                                                     | 92521  |
|  | <b>C6orf48</b>  | chromosome 6 open reading frame 48                             | 50854  |
|  | <b>C6orf48</b>  | chromosome 6 open reading frame 48                             | 50854  |
|  | <b>GCA</b>      | grancalcin, EF-hand calcium binding protein                    | 25801  |
|  | <b>ZNF193</b>   | zinc finger protein 193                                        | 7746   |
|  | <b>SLK</b>      | STE20-like kinase (yeast)                                      | 9748   |
|  | <b>BRCA2</b>    | breast cancer 2, early onset                                   | 675    |
|  | <b>TMEM40</b>   | transmembrane protein 40                                       | 55287  |
|  | <b>PIGB</b>     | phosphatidylinositol glycan anchor biosynthesis, class B       | 9488   |
|  | <b>SLC38A9</b>  | solute carrier family 38, member 9                             | 153129 |
|  | <b>WDR73</b>    | WD repeat domain 73                                            | 84942  |
|  | <b>PPP1R15A</b> | protein phosphatase 1, regulatory (inhibitor) subunit 15A      | 23645  |
|  | <b>SPOPL</b>    | speckle-type POZ protein-like                                  | 339745 |

|  |                  |                                                             |        |
|--|------------------|-------------------------------------------------------------|--------|
|  | <b>FCHSD1</b>    | FCH and double SH3 domains 1                                | 89848  |
|  | <b>HLA-DOB</b>   | major histocompatibility complex, class II, DO beta         | 3112   |
|  | <b>BMPR2</b>     | bone morphogenetic protein receptor, type II (serine/thre   | 659    |
|  | <b>SASH1</b>     | SAM and SH3 domain containing 1                             | 23328  |
|  | <b>LINS1</b>     | lines homolog 1 (Drosophila)                                | 55180  |
|  | <b>BTD</b>       | biotinidase                                                 | 686    |
|  | <b>KIAA1328</b>  | KIAA1328                                                    | 57536  |
|  | <b>VEGFC</b>     | vascular endothelial growth factor C                        | 7424   |
|  | <b>ZFAND2A</b>   | zinc finger, AN1-type domain 2A                             | 90637  |
|  | <b>STAG3L4</b>   | stromal antigen 3-like 4                                    | 64940  |
|  | <b>HLA-DRB3</b>  | major histocompatibility complex, class II, DR beta 3       | 3125   |
|  | <b>SDSL</b>      | serine dehydratase-like                                     | 113675 |
|  | <b>FTH1</b>      | ferritin, heavy polypeptide 1                               | 2495   |
|  | <b>CTTNBP2NL</b> | CTTNBP2 N-terminal like                                     | 55917  |
|  | <b>PSAP</b>      | prosaposin                                                  | 5660   |
|  | <b>NEK7</b>      | NIMA (never in mitosis gene a)-related kinase 7             | 140609 |
|  | <b>VAMP5</b>     | vesicle-associated membrane protein 5 (myobrevin)           | 10791  |
|  | <b>TBK1</b>      | TANK-binding kinase 1                                       | 29110  |
|  | <b>TRPM7</b>     | transient receptor potential cation channel, subfamily M, r | 54822  |
|  | <b>ZNF365</b>    | zinc finger protein 365                                     | 22891  |
|  | <b>ATG4A</b>     | ATG4 autophagy related 4 homolog A ( <i>S. cerevisiae</i> ) | 115201 |
|  | <b>MEGF9</b>     | multiple EGF-like-domains 9                                 | 1955   |
|  | <b>RHBDD1</b>    | rhomboïd domain containing 1                                | 84236  |
|  | <b>NFIX</b>      | nuclear factor I/X (CCAAT-binding transcription factor)     | 4784   |
|  | <b>GOLPH3L</b>   | golgi phosphoprotein 3-like                                 | 55204  |
|  | <b>C5orf56</b>   | chromosome 5 open reading frame 56                          | 441108 |
|  | <b>ZNF680</b>    | zinc finger protein 680                                     | 340252 |
|  | <b>GTF2F2</b>    | general transcription factor IIF, polypeptide 2, 30kDa      | 2963   |
|  | <b>PLEKHM1</b>   | pleckstrin homology domain containing, family M (with RU    | 9842   |
|  | <b>BCL2L11</b>   | BCL2-like 11 (apoptosis facilitator)                        | 10018  |
|  | <b>ACVR2A</b>    | activin A receptor, type IIA                                | 92     |
|  | <b>BNIP2</b>     | BCL2/adenovirus E1B 19kDa interacting protein 2             | 663    |
|  | <b>NUAK2</b>     | NUAK family, SNF1-like kinase, 2                            | 81788  |
|  | <b>MOV10</b>     | Mov10, Moloney leukemia virus 10, homolog (mouse)           | 4343   |
|  | <b>EPC1</b>      | enhancer of polycomb homolog 1 (Drosophila)                 | 80314  |
|  | <b>C1orf107</b>  | chromosome 1 open reading frame 107                         | 27042  |
|  | <b>HLA-DOB</b>   | major histocompatibility complex, class II, DO beta         | 3112   |
|  | <b>TNFAIP8</b>   | tumor necrosis factor, alpha-induced protein 8              | 25816  |
|  | <b>AIM1</b>      | absent in melanoma 1                                        | 202    |
|  | <b>MFNG</b>      | MFNG O-fucosylpeptide 3-beta-N-acetylglucosaminyltrans      | 4242   |
|  | <b>SLC36A1</b>   | solute carrier family 36 (proton/amino acid symporter), m   | 206358 |



|  |                  |                                                            |        |
|--|------------------|------------------------------------------------------------|--------|
|  | <b>NOL8</b>      | nucleolar protein 8                                        | 55035  |
|  | <b>MCL1</b>      | myeloid cell leukemia sequence 1 (BCL2-related)            | 4170   |
|  | <b>ITPR3</b>     | inositol 1,4,5-triphosphate receptor, type 3               | 3710   |
|  | <b>CENPL</b>     | centromere protein L                                       | 91687  |
|  | <b>NGRN</b>      | neugrin, neurite outgrowth associated                      | 51335  |
|  | <b>HOXA2</b>     | homeobox A2                                                | 3199   |
|  | <b>WNT7A</b>     | wingless-type MMTV integration site family, member 7A      | 7476   |
|  | <b>E2F3</b>      | E2F transcription factor 3                                 | 1871   |
|  | <b>CENPQ</b>     | centromere protein Q                                       | 55166  |
|  | <b>CASP4</b>     | caspase 4, apoptosis-related cysteine peptidase            | 837    |
|  | <b>RHPN2</b>     | rhopilin, Rho GTPase binding protein 2                     | 85415  |
|  | <b>KATNAL1</b>   | katanin p60 subunit A-like 1                               | 84056  |
|  | <b>SCARNA17</b>  | small Cajal body-specific RNA 17                           | 677769 |
|  | <b>ZNF85</b>     | zinc finger protein 85                                     | 7639   |
|  | <b>TYK2</b>      | tyrosine kinase 2                                          | 7297   |
|  | <b>FCHSD2</b>    | FCH and double SH3 domains 2                               | 9873   |
|  | <b>NR1H2</b>     | nuclear receptor subfamily 1, group H, member 2            | 7376   |
|  | <b>EFCAB2</b>    | EF-hand calcium binding domain 2                           | 84288  |
|  | <b>EFTUD1</b>    | elongation factor Tu GTP binding domain containing 1       | 79631  |
|  | <b>NR2F6</b>     | nuclear receptor subfamily 2, group F, member 6            | 2063   |
|  | <b>DPP8</b>      | dipeptidyl-peptidase 8                                     | 54878  |
|  | <b>SCLT1</b>     | sodium channel and clathrin linker 1                       | 132320 |
|  | <b>FAT2</b>      | FAT tumor suppressor homolog 2 (Drosophila)                | 2196   |
|  | <b>THG1L</b>     | tRNA-histidine guanylyltransferase 1-like (S. cerevisiae)  | 54974  |
|  | <b>BTC</b>       | betacellulin                                               | 685    |
|  | <b>STX3</b>      | syntaxin 3                                                 | 6809   |
|  | <b>TNFAIP2</b>   | tumor necrosis factor, alpha-induced protein 2             | 7127   |
|  | <b>COG3</b>      | component of oligomeric golgi complex 3                    | 83548  |
|  | <b>TMEM126B</b>  | transmembrane protein 126B                                 | 55863  |
|  | <b>TMEM194A</b>  | transmembrane protein 194A                                 | 23306  |
|  | <b>ZBTB43</b>    | zinc finger and BTB domain containing 43                   | 23099  |
|  | <b>VGLL3</b>     | vestigial like 3 (Drosophila)                              | 389136 |
|  | <b>COL4A3BP</b>  | collagen, type IV, alpha 3 (Goodpasture antigen) binding p | 10087  |
|  | <b>PHACTR2</b>   | phosphatase and actin regulator 2                          | 9749   |
|  | <b>GPR85</b>     | G protein-coupled receptor 85                              | 54329  |
|  | <b>CCDC109B</b>  | coiled-coil domain containing 109B                         | 55013  |
|  | <b>LOC388692</b> | hypothetical LOC388692                                     | 388692 |
|  | <b>PPP1R12B</b>  | protein phosphatase 1, regulatory (inhibitor) subunit 12B  | 4660   |
|  | <b>AAGAB</b>     | alpha- and gamma-adaptin binding protein                   | 79719  |
|  | <b>CD47</b>      | CD47 molecule                                              | 961    |
|  | <b>TRIM26</b>    | tripartite motif-containing 26                             | 7726   |

|  |          |                                                              |        |
|--|----------|--------------------------------------------------------------|--------|
|  | RPS27L   | ribosomal protein S27-like                                   | 51065  |
|  | GBA      | glucosidase, beta; acid (includes glucosylceramidase)        | 2629   |
|  | CALD1    | caldesmon 1                                                  | 800    |
|  | ASB7     | ankyrin repeat and SOCS box-containing 7                     | 140460 |
|  | REEP3    | receptor accessory protein 3                                 | 221035 |
|  | HIP1R    | huntingtin interacting protein 1 related                     | 9026   |
|  | SRPX2    | sushi-repeat-containing protein, X-linked 2                  | 27286  |
|  | EPS8L2   | EPS8-like 2                                                  | 64787  |
|  | IQGAP1   | IQ motif containing GTPase activating protein 1              | 8826   |
|  | WHAMM    | WAS protein homolog associated with actin, golgi membra      | 123720 |
|  | KIAA0040 | KIAA0040                                                     | 9674   |
|  | NPR3     | natriuretic peptide receptor C/guanylate cyclase C (atriona  | 4883   |
|  | SFXN3    | sideroflexin 3                                               | 81855  |
|  | RFX5     | regulatory factor X, 5 (influences HLA class II expression)  | 5993   |
|  | PPP1R15B | protein phosphatase 1, regulatory (inhibitor) subunit 15B    | 84919  |
|  | KCNMB3   | potassium large conductance calcium-activated channel, s     | 27094  |
|  | NUDT16P  | nudix (nucleoside diphosphate linked moiety X)-type moti     | 152195 |
|  | SYNJ2    | synaptojanin 2                                               | 8871   |
|  | AACS     | acetoacetyl-CoA synthetase                                   | 65985  |
|  | MOCOS    | molybdenum cofactor sulfurase                                | 55034  |
|  | HCFC2    | host cell factor C2                                          | 29915  |
|  | ZFAND6   | zinc finger, AN1-type domain 6                               | 54469  |
|  | RASA3    | RAS p21 protein activator 3                                  | 22821  |
|  | IL13RA1  | interleukin 13 receptor, alpha 1                             | 3597   |
|  | GAS6     | growth arrest-specific 6                                     | 2621   |
|  | CPEB3    | cytoplasmic polyadenylation element binding protein 3        | 22849  |
|  | STOM     | stomatin                                                     | 2040   |
|  | NR1D1    | nuclear receptor subfamily 1, group D, member 1              | 9572   |
|  | HMG20A   | high-mobility group 20A                                      | 10363  |
|  | RASAL2   | RAS protein activator like 2                                 | 9462   |
|  | EAF2     | ELL associated factor 2                                      | 55840  |
|  | SMCHD1   | structural maintenance of chromosomes flexible hinge do      | 23347  |
|  | MT1JP    | metallothionein 1J (pseudogene)                              | 4498   |
|  | CALCOCO1 | calcium binding and coiled-coil domain 1                     | 57658  |
|  | STAT3    | signal transducer and activator of transcription 3 (acute-ph | 6774   |
|  | MEIS2    | Meis homeobox 2                                              | 4212   |
|  | N4BP1    | NEDD4 binding protein 1                                      | 9683   |
|  | SPIRE1   | spire homolog 1 (Drosophila)                                 | 56907  |
|  | TMEM171  | transmembrane protein 171                                    | 134285 |
|  | C1orf112 | chromosome 1 open reading frame 112                          | 55732  |
|  | FRK      | fyn-related kinase                                           | 2444   |

|  |                 |                                                                                       |        |
|--|-----------------|---------------------------------------------------------------------------------------|--------|
|  | <b>CNOT6L</b>   | CCR4-NOT transcription complex, subunit 6-like                                        | 246175 |
|  | <b>MCTP2</b>    | multiple C2 domains, transmembrane 2                                                  | 55784  |
|  | <b>C1orf85</b>  | chromosome 1 open reading frame 85                                                    | 112770 |
|  | <b>STAT6</b>    | signal transducer and activator of transcription 6, interleukin-6-induced             | 6778   |
|  | <b>ARL4A</b>    | ADP-ribosylation factor-like 4A                                                       | 10124  |
|  | <b>PLXNA2</b>   | plexin A2                                                                             | 5362   |
|  | <b>C11orf63</b> | chromosome 11 open reading frame 63                                                   | 79864  |
|  | <b>MLKL</b>     | mixed lineage kinase domain-like                                                      | 197259 |
|  | <b>ANKRD57</b>  | ankyrin repeat domain 57                                                              | 65124  |
|  | <b>AOC2</b>     | amine oxidase, copper containing 2 (retina-specific)                                  | 314    |
|  | <b>SRGAP1</b>   | SLIT-ROBO Rho GTPase activating protein 1                                             | 57522  |
|  | <b>LAMB1</b>    | laminin, beta 1                                                                       | 3912   |
|  | <b>SCO2</b>     | SCO cytochrome oxidase deficient homolog 2 (yeast)                                    | 9997   |
|  | <b>TULP4</b>    | tubby like protein 4                                                                  | 56995  |
|  | <b>INO80D</b>   | INO80 complex subunit D                                                               | 54891  |
|  | <b>FANK1</b>    | fibronectin type III and ankyrin repeat domains 1                                     | 92565  |
|  | <b>MSMB</b>     | microseminoprotein, beta-                                                             | 4477   |
|  | <b>SPPL2A</b>   | signal peptide peptidase-like 2A                                                      | 84888  |
|  | <b>SPOCK1</b>   | sparc/osteonectin, cwcv and kazal-like domains proteoglycan-associated core protein 1 | 6695   |
|  | <b>MOCS1</b>    | molybdenum cofactor synthesis 1                                                       | 4337   |
|  | <b>OTUD7A</b>   | OTU domain containing 7A                                                              | 161725 |
|  | <b>ANKRD13A</b> | ankyrin repeat domain 13A                                                             | 88455  |
|  | <b>XPR1</b>     | xenotropic and polytropic retrovirus receptor                                         | 9213   |
|  | <b>KLHL2</b>    | kelch-like 2, Mayven (Drosophila)                                                     | 11275  |
|  | <b>ZCCHC6</b>   | zinc finger, CCHC domain containing 6                                                 | 79670  |
|  | <b>LIN9</b>     | lin-9 homolog (C. elegans)                                                            | 286826 |
|  | <b>TRIM26</b>   | tripartite motif-containing 26                                                        | 7726   |
|  | <b>PDE3B</b>    | phosphodiesterase 3B, cGMP-inhibited                                                  | 5140   |
|  | <b>ZNF701</b>   | zinc finger protein 701                                                               | 55762  |
|  | <b>RBPM5</b>    | RNA binding protein with multiple splicing                                            | 11030  |
|  | <b>CLEC2B</b>   | C-type lectin domain family 2, member B                                               | 9976   |
|  | <b>CAST</b>     | calpastatin                                                                           | 831    |
|  | <b>NFASC</b>    | neurofascin homolog (chicken)                                                         | 23114  |
|  | <b>CYP27B1</b>  | cytochrome P450, family 27, subfamily B, polypeptide 1                                | 1594   |
|  | <b>PRKD2</b>    | protein kinase D2                                                                     | 25865  |
|  | <b>HLA-DRB3</b> | major histocompatibility complex, class II, DR beta 3                                 | 3125   |
|  | <b>GPR87</b>    | G protein-coupled receptor 87                                                         | 53836  |
|  | <b>FADS3</b>    | fatty acid desaturase 3                                                               | 3995   |
|  | <b>JMJD1C</b>   | jumonji domain containing 1C                                                          | 221037 |
|  | <b>ABCG2</b>    | ATP-binding cassette, sub-family G (WHITE), member 2                                  | 9429   |
|  | <b>POLR3C</b>   | polymerase (RNA) III (DNA directed) polypeptide C (62kD)                              | 10623  |

|  |                 |                                                             |        |
|--|-----------------|-------------------------------------------------------------|--------|
|  | <b>ARSK</b>     | arylsulfatase family, member K                              | 153642 |
|  | <b>MFGE8</b>    | milk fat globule-EGF factor 8 protein                       | 4240   |
|  | <b>MEIS3P1</b>  | Meis homeobox 3 pseudogene 1                                | 4213   |
|  | <b>C2orf67</b>  | chromosome 2 open reading frame 67                          | 151050 |
|  | <b>CDC42SE1</b> | CDC42 small effector 1                                      | 56882  |
|  | <b>JAZF1</b>    | JAZF zinc finger 1                                          | 221895 |
|  | <b>TPCN1</b>    | two pore segment channel 1                                  | 53373  |
|  | <b>PLIN3</b>    | perilipin 3                                                 | 10226  |
|  | <b>TTLL7</b>    | tubulin tyrosine ligase-like family, member 7               | 79739  |
|  | <b>DUOXA1</b>   | dual oxidase maturation factor 1                            | 90527  |
|  | <b>HIST1H4F</b> | histone cluster 1, H4f                                      | 8361   |
|  | <b>FBXO2</b>    | F-box protein 2                                             | 26232  |
|  | <b>POLK</b>     | polymerase (DNA directed) kappa                             | 51426  |
|  | <b>RHBDD2</b>   | rhomboid domain containing 2                                | 57414  |
|  | <b>LAMA3</b>    | laminin, alpha 3                                            | 3909   |
|  | <b>HELB</b>     | helicase (DNA) B                                            | 92797  |
|  | <b>OBSCN</b>    | obscurin, cytoskeletal calmodulin and titin-interacting Rho | 84033  |
|  | <b>IL18R1</b>   | interleukin 18 receptor 1                                   | 8809   |
|  | <b>UTRN</b>     | utrophin                                                    | 7402   |
|  | <b>PARP4</b>    | poly (ADP-ribose) polymerase family, member 4               | 143    |
|  | <b>KIAA1949</b> | KIAA1949                                                    | 170954 |
|  | <b>MYO5A</b>    | myosin VA (heavy chain 12, myoxin)                          | 4644   |
|  | <b>DSE</b>      | dermatan sulfate epimerase                                  | 29940  |
|  | <b>B3GNT3</b>   | UDP-GlcNAc:betaGal beta-1,3-N-acetylglucosaminyltransfe     | 10331  |
|  | <b>PSORS1C1</b> | psoriasis susceptibility 1 candidate 1                      | 170679 |
|  | <b>IKBKE</b>    | inhibitor of kappa light polypeptide gene enhancer in B-ce  | 9641   |
|  | <b>PODXL</b>    | podocalyxin-like                                            | 5420   |
|  | <b>APOBEC3F</b> | apolipoprotein B mRNA editing enzyme, catalytic polypept    | 200316 |
|  | <b>SERPINB8</b> | serpin peptidase inhibitor, clade B (ovalbumin), member 8   | 5271   |
|  | <b>PTAR1</b>    | protein prenyltransferase alpha subunit repeat containing   | 375743 |
|  | <b>PATL2</b>    | protein associated with topoisomerase II homolog 2 (yeast   | 197135 |
|  | <b>ANKIB1</b>   | ankyrin repeat and IBR domain containing 1                  | 54467  |
|  | <b>MYADM</b>    | myeloid-associated differentiation marker                   | 91663  |
|  | <b>TNS3</b>     | tensin 3                                                    | 64759  |
|  | <b>MAP2K1</b>   | mitogen-activated protein kinase kinase 1                   | 5604   |
|  | <b>RASEF</b>    | RAS and EF-hand domain containing                           | 158158 |
|  | <b>RHOD</b>     | ras homolog gene family, member D                           | 29984  |
|  | <b>STAC</b>     | SH3 and cysteine rich domain                                | 6769   |
|  | <b>SSH3</b>     | slingshot homolog 3 (Drosophila)                            | 54961  |
|  | <b>RNLS</b>     | renalase, FAD-dependent amine oxidase                       | 55328  |
|  | <b>KBTBD2</b>   | kelch repeat and BTB (POZ) domain containing 2              | 25948  |

|  |                  |                                                            |        |
|--|------------------|------------------------------------------------------------|--------|
|  | <b>C7orf23</b>   | chromosome 7 open reading frame 23                         | 79161  |
|  | <b>CPM</b>       | carboxypeptidase M                                         | 1368   |
|  | <b>PCDH7</b>     | protocadherin 7                                            | 5099   |
|  | <b>RNF111</b>    | ring finger protein 111                                    | 54778  |
|  | <b>SHISA4</b>    | shisa homolog 4 ( <i>Xenopus laevis</i> )                  | 149345 |
|  | <b>TNFSF15</b>   | tumor necrosis factor (ligand) superfamily, member 15      | 9966   |
|  | <b>SLC24A6</b>   | solute carrier family 24 (sodium/potassium/calcium excha   | 80024  |
|  | <b>RAB25</b>     | RAB25, member RAS oncogene family                          | 57111  |
|  | <b>C5orf37</b>   | chromosome 5 open reading frame 37                         | 134359 |
|  | <b>ZDHHC1</b>    | zinc finger, DHHC-type containing 1                        | 29800  |
|  | <b>ECHDC2</b>    | enoyl Coenzyme A hydratase domain containing 2             | 55268  |
|  | <b>COQ10B</b>    | coenzyme Q10 homolog B ( <i>S. cerevisiae</i> )            | 80219  |
|  | <b>PARP8</b>     | poly (ADP-ribose) polymerase family, member 8              | 79668  |
|  | <b>RAB7L1</b>    | RAB7, member RAS oncogene family-like 1                    | 8934   |
|  | <b>VWDE</b>      | von Willebrand factor D and EGF domains                    | 221806 |
|  | <b>PON2</b>      | paraoxonase 2                                              | 5445   |
|  | <b>KIAA0513</b>  | KIAA0513                                                   | 9764   |
|  | <b>CDK8</b>      | cyclin-dependent kinase 8                                  | 1024   |
|  | <b>MYD88</b>     | myeloid differentiation primary response gene (88)         | 4615   |
|  | <b>SBNO2</b>     | strawberry notch homolog 2 ( <i>Drosophila</i> )           | 22904  |
|  | <b>PLCB1</b>     | phospholipase C, beta 1 (phosphoinositide-specific)        | 23236  |
|  | <b>RFX7</b>      | regulatory factor X, 7                                     | 64864  |
|  | <b>ASAH2</b>     | N-acylsphingosine amidohydrolase (non-lysosomal cerami     | 56624  |
|  | <b>PEA15</b>     | phosphoprotein enriched in astrocytes 15                   | 8682   |
|  | <b>GNAQ</b>      | guanine nucleotide binding protein (G protein), q polypept | 2776   |
|  | <b>KCNMB4</b>    | potassium large conductance calcium-activated channel, s   | 27345  |
|  | <b>WDR47</b>     | WD repeat domain 47                                        | 22911  |
|  | <b>MT2A</b>      | metallothionein 2A                                         | 4502   |
|  | <b>KCNMB3</b>    | potassium large conductance calcium-activated channel, s   | 27094  |
|  | <b>MAP3K7IP2</b> | mitogen-activated protein kinase kinase kinase 7 interacti | 23118  |
|  | <b>ZNF608</b>    | zinc finger protein 608                                    | 57507  |
|  | <b>C10orf54</b>  | chromosome 10 open reading frame 54                        | 64115  |
|  | <b>ARPC1B</b>    | actin related protein 2/3 complex, subunit 1B, 41kDa       | 10095  |
|  | <b>PSEN2</b>     | presenilin 2 (Alzheimer disease 4)                         | 5664   |
|  | <b>BHLHE41</b>   | basic helix-loop-helix family, member e41                  | 79365  |
|  | <b>IKZF3</b>     | IKAROS family zinc finger 3 ( <i>Aiolos</i> )              | 22806  |
|  | <b>SLC38A5</b>   | solute carrier family 38, member 5                         | 92745  |
|  | <b>STK10</b>     | serine/threonine kinase 10                                 | 6793   |
|  | <b>ZNF778</b>    | zinc finger protein 778                                    | 197320 |
|  | <b>KIAA1033</b>  | KIAA1033                                                   | 23325  |
|  | <b>BMPR1B</b>    | bone morphogenetic protein receptor, type IB               | 658    |

|  |                  |                                                             |        |
|--|------------------|-------------------------------------------------------------|--------|
|  | <b>HRH1</b>      | histamine receptor H1                                       | 3269   |
|  | <b>SLC12A7</b>   | solute carrier family 12 (potassium/chloride transporters), | 10723  |
|  | <b>EFNA1</b>     | ephrin-A1                                                   | 1942   |
|  | <b>ZBP1</b>      | Z-DNA binding protein 1                                     | 81030  |
|  | <b>CCPG1</b>     | cell cycle progression 1                                    | 9236   |
|  | <b>TAPBP</b>     | TAP binding protein (tapasin)                               | 6892   |
|  | <b>GPC1</b>      | glypican 1                                                  | 2817   |
|  | <b>GRINL1A</b>   | glutamate receptor, ionotropic, N-methyl D-aspartate-like   | 81488  |
|  | <b>DST</b>       | dystonin                                                    | 667    |
|  | <b>SETDB2</b>    | SET domain, bifurcated 2                                    | 83852  |
|  | <b>BHLHE40</b>   | basic helix-loop-helix family, member e40                   | 8553   |
|  | <b>PTRF</b>      | polymerase I and transcript release factor                  | 284119 |
|  | <b>SMOC1</b>     | SPARC related modular calcium binding 1                     | 64093  |
|  | <b>SERTAD4</b>   | SERTA domain containing 4                                   | 56256  |
|  | <b>IRF6</b>      | interferon regulatory factor 6                              | 3664   |
|  | <b>TMEM79</b>    | transmembrane protein 79                                    | 84283  |
|  | <b>MYO5B</b>     | myosin VB                                                   | 4645   |
|  | <b>MAPK6</b>     | mitogen-activated protein kinase 6                          | 5597   |
|  | <b>SYT14</b>     | synaptotagmin XIV                                           | 255928 |
|  | <b>SEMA4C</b>    | sema domain, immunoglobulin domain (Ig), transmembra        | 54910  |
|  | <b>C19orf21</b>  | chromosome 19 open reading frame 21                         | 126353 |
|  | <b>MASTL</b>     | microtubule associated serine/threonine kinase-like         | 84930  |
|  | <b>LPCAT2</b>    | lysophosphatidylcholine acyltransferase 2                   | 54947  |
|  | <b>C5orf30</b>   | chromosome 5 open reading frame 30                          | 90355  |
|  | <b>C10orf118</b> | chromosome 10 open reading frame 118                        | 55088  |
|  | <b>NGB</b>       | neuroglobin                                                 | 58157  |
|  | <b>OTUD1</b>     | OTU domain containing 1                                     | 220213 |
|  | <b>CASP7</b>     | caspase 7, apoptosis-related cysteine peptidase             | 840    |
|  | <b>XRCC4</b>     | X-ray repair complementing defective repair in Chinese ha   | 7518   |
|  | <b>ELF1</b>      | E74-like factor 1 (ets domain transcription factor)         | 1997   |
|  | <b>CSF1</b>      | colony stimulating factor 1 (macrophage)                    | 1435   |
|  | <b>XRN1</b>      | 5'-3' exoribonuclease 1                                     | 54464  |
|  | <b>NCOA7</b>     | nuclear receptor coactivator 7                              | 135112 |
|  | <b>SLFN5</b>     | schlafen family member 5                                    | 162394 |
|  | <b>C1QTNF6</b>   | C1q and tumor necrosis factor related protein 6             | 114904 |
|  | <b>NUB1</b>      | negative regulator of ubiquitin-like proteins 1             | 51667  |
|  | <b>RICS</b>      | Rho GTPase-activating protein                               | 9743   |
|  | <b>SORBS2</b>    | sorbin and SH3 domain containing 2                          | 8470   |
|  | <b>IL15RA</b>    | interleukin 15 receptor, alpha                              | 3601   |
|  | <b>UNC5B</b>     | unc-5 homolog B (C. elegans)                                | 219699 |
|  | <b>SMAD3</b>     | SMAD family member 3                                        | 4088   |

|  |                  |                                                                |        |
|--|------------------|----------------------------------------------------------------|--------|
|  | <b>TAPBP</b>     | TAP binding protein (tapasin)                                  | 6892   |
|  | <b>LIPH</b>      | lipase, member H                                               | 200879 |
|  | <b>DCLRE1C</b>   | DNA cross-link repair 1C (PSO2 homolog, <i>S. cerevisiae</i> ) | 64421  |
|  | <b>BMP4</b>      | bone morphogenetic protein 4                                   | 652    |
|  | <b>GRINL1A</b>   | glutamate receptor, ionotropic, N-methyl D-aspartate-like      | 81488  |
|  | <b>ELF3</b>      | E74-like factor 3 (ets domain transcription factor, epithelia  | 1999   |
|  | <b>UBE2Q2</b>    | ubiquitin-conjugating enzyme E2Q family member 2               | 92912  |
|  | <b>C6orf62</b>   | chromosome 6 open reading frame 62                             | 81688  |
|  | <b>MCAM</b>      | melanoma cell adhesion molecule                                | 4162   |
|  | <b>COL4A2</b>    | collagen, type IV, alpha 2                                     | 1284   |
|  | <b>OSMR</b>      | oncostatin M receptor                                          | 9180   |
|  | <b>GLCE</b>      | glucuronic acid epimerase                                      | 26035  |
|  | <b>NRP1</b>      | neuropilin 1                                                   | 8829   |
|  | <b>TAPBP</b>     | TAP binding protein (tapasin)                                  | 6892   |
|  | <b>F2R</b>       | coagulation factor II (thrombin) receptor                      | 2149   |
|  | <b>LPAR6</b>     | lysophosphatidic acid receptor 6                               | 10161  |
|  | <b>KLF4</b>      | Kruppel-like factor 4 (gut)                                    | 9314   |
|  | <b>ENAH</b>      | enabled homolog ( <i>Drosophila</i> )                          | 55740  |
|  | <b>ADAM12</b>    | ADAM metallopeptidase domain 12                                | 8038   |
|  | <b>VDR</b>       | vitamin D (1,25- dihydroxyvitamin D3) receptor                 | 7421   |
|  | <b>SULT1A2</b>   | sulfotransferase family, cytosolic, 1A, phenol-preferring, m   | 6799   |
|  | <b>SCARNA17</b>  | small Cajal body-specific RNA 17                               | 677769 |
|  | <b>MT2A</b>      | metallothionein 2A                                             | 4502   |
|  | <b>VAV2</b>      | vav 2 guanine nucleotide exchange factor                       | 7410   |
|  | <b>MFF</b>       | mitochondrial fission factor                                   | 56947  |
|  | <b>LIMA1</b>     | LIM domain and actin binding 1                                 | 51474  |
|  | <b>LOXL2</b>     | lysyl oxidase-like 2                                           | 4017   |
|  | <b>TMEM45B</b>   | transmembrane protein 45B                                      | 120224 |
|  | <b>LOC400590</b> | hypothetical LOC400590                                         | 400590 |
|  | <b>RIPK3</b>     | receptor-interacting serine-threonine kinase 3                 | 11035  |
|  | <b>HLA-DQB1</b>  | major histocompatibility complex, class II, DQ beta 1          | 3119   |
|  | <b>KLF10</b>     | Kruppel-like factor 10                                         | 7071   |
|  | <b>ABHD3</b>     | abhydrolase domain containing 3                                | 171586 |
|  | <b>VPS13C</b>    | vacuolar protein sorting 13 homolog C ( <i>S. cerevisiae</i> ) | 54832  |
|  | <b>TRIP12</b>    | thyroid hormone receptor interactor 12                         | 9320   |
|  | <b>IL12RB2</b>   | interleukin 12 receptor, beta 2                                | 3595   |
|  | <b>TINAGL1</b>   | tubulointerstitial nephritis antigen-like 1                    | 64129  |
|  | <b>TMC7</b>      | transmembrane channel-like 7                                   | 79905  |
|  | <b>C13orf31</b>  | chromosome 13 open reading frame 31                            | 144811 |
|  | <b>CFHR1</b>     | complement factor H-related 1                                  | 3078   |
|  | <b>CD109</b>     | CD109 molecule                                                 | 135228 |



|  |          |                                                              |        |
|--|----------|--------------------------------------------------------------|--------|
|  | LACTB    | lactamase, beta                                              | 114294 |
|  | WARS     | tryptophanyl-tRNA synthetase                                 | 7453   |
|  | TMEM62   | transmembrane protein 62                                     | 80021  |
|  | ADAM10   | ADAM metallopeptidase domain 10                              | 102    |
|  | PLEKHF1  | pleckstrin homology domain containing, family F (with FYV    | 79156  |
|  | LPAR1    | lysophosphatidic acid receptor 1                             | 1902   |
|  | DFNA5    | deafness, autosomal dominant 5                               | 1687   |
|  | USP8     | ubiquitin specific peptidase 8                               | 9101   |
|  | GCNT4    | glucosaminyl (N-acetyl) transferase 4, core 2 (beta-1,6-N-a  | 51301  |
|  | UFM1     | ubiquitin-fold modifier 1                                    | 51569  |
|  | RAC2     | ras-related C3 botulinum toxin substrate 2 (rho family, sma  | 5880   |
|  | CMYA5    | cardiomyopathy associated 5                                  | 202333 |
|  | AVPI1    | arginine vasopressin-induced 1                               | 60370  |
|  | FAM46A   | family with sequence similarity 46, member A                 | 55603  |
|  | RNF115   | ring finger protein 115                                      | 27246  |
|  | GPRC5B   | G protein-coupled receptor, family C, group 5, member B      | 51704  |
|  | IL4R     | interleukin 4 receptor                                       | 3566   |
|  | RASGRF2  | Ras protein-specific guanine nucleotide-releasing factor 2   | 5924   |
|  | GALNT6   | UDP-N-acetyl-alpha-D-galactosamine:polypeptide N-acety       | 11226  |
|  | LRG1     | leucine-rich alpha-2-glycoprotein 1                          | 116844 |
|  | PRR15    | proline rich 15                                              | 222171 |
|  | SERPINB6 | serpin peptidase inhibitor, clade B (ovalbumin), member 6    | 5269   |
|  | EPPK1    | epiplakin 1                                                  | 83481  |
|  | HIST3H2A | histone cluster 3, H2a                                       | 92815  |
|  | SULT1A3  | sulfotransferase family, cytosolic, 1A, phenol-preferring, m | 6818   |
|  | PTAFR    | platelet-activating factor receptor                          | 5724   |
|  | ALG11    | asparagine-linked glycosylation 11, alpha-1,2-mannosyltra    | 440138 |
|  | FBXO17   | F-box protein 17                                             | 115290 |
|  | GNAQ     | guanine nucleotide binding protein (G protein), q polypept   | 2776   |
|  | JAK2     | Janus kinase 2                                               | 3717   |
|  | PTPRE    | protein tyrosine phosphatase, receptor type, E               | 5791   |
|  | BNC1     | basonuclin 1                                                 | 646    |
|  | DUOX2    | dual oxidase 2                                               | 50506  |
|  | EFEMP1   | EGF-containing fibulin-like extracellular matrix protein 1   | 2202   |
|  | BAZ2B    | bromodomain adjacent to zinc finger domain, 2B               | 29994  |
|  | AP4E1    | adaptor-related protein complex 4, epsilon 1 subunit         | 23431  |
|  | SLC6A2   | solute carrier family 6 (neurotransmitter transporter, nora  | 6530   |
|  | SEC24D   | SEC24 family, member D ( <i>S. cerevisiae</i> )              | 9871   |
|  | CCRL1    | chemokine (C-C motif) receptor-like 1                        | 51554  |
|  | THSD1    | thrombospondin, type I, domain containing 1                  | 55901  |
|  | EPAG     | early lymphoid activation protein                            | 10824  |

|  |  |                  |                                                                     |        |
|--|--|------------------|---------------------------------------------------------------------|--------|
|  |  | <b>CRAT</b>      | carnitine acetyltransferase                                         | 1384   |
|  |  | <b>AMPD3</b>     | adenosine monophosphate deaminase (isoform E)                       | 272    |
|  |  | <b>GPR176</b>    | G protein-coupled receptor 176                                      | 11245  |
|  |  | <b>GTPBP2</b>    | GTP binding protein 2                                               | 54676  |
|  |  | <b>TBC1D2</b>    | TBC1 domain family, member 2                                        | 55357  |
|  |  | <b>TTC23</b>     | tetratricopeptide repeat domain 23                                  | 64927  |
|  |  | <b>PRSS22</b>    | protease, serine, 22                                                | 64063  |
|  |  | <b>PCMTD2</b>    | protein-L-isoaspartate (D-aspartate) O-methyltransferase            | 55251  |
|  |  | <b>PCMTD2</b>    | protein-L-isoaspartate (D-aspartate) O-methyltransferase            | 55251  |
|  |  | <b>GNA15</b>     | guanine nucleotide binding protein (G protein), alpha 15 (G)        | 2769   |
|  |  | <b>CD70</b>      | CD70 molecule                                                       | 970    |
|  |  | <b>AMY1A</b>     | amylase, alpha 1A (salivary)                                        | 276    |
|  |  | <b>AMY1A</b>     | amylase, alpha 1A (salivary)                                        | 276    |
|  |  | <b>AMY1A</b>     | amylase, alpha 1A (salivary)                                        | 276    |
|  |  | <b>IGF1R</b>     | insulin-like growth factor 1 receptor                               | 3480   |
|  |  | <b>YPEL2</b>     | yippee-like 2 (Drosophila)                                          | 388403 |
|  |  | <b>ITGA3</b>     | integrin, alpha 3 (antigen CD49C, alpha 3 subunit of VLA-3)         | 3675   |
|  |  | <b>VWA5A</b>     | von Willebrand factor A domain containing 5A                        | 4013   |
|  |  | <b>SLC25A28</b>  | solute carrier family 25, member 28                                 | 81894  |
|  |  | <b>FAM188B</b>   | family with sequence similarity 188, member B                       | 84182  |
|  |  | <b>ANXA3</b>     | annexin A3                                                          | 306    |
|  |  | <b>AGFG1</b>     | ArfGAP with FG repeats 1                                            | 3267   |
|  |  | <b>TRIM25</b>    | tripartite motif-containing 25                                      | 7706   |
|  |  | <b>ANKH</b>      | ankylosis, progressive homolog (mouse)                              | 56172  |
|  |  | <b>LOC388022</b> | hypothetical gene supported by AK131040                             | 388022 |
|  |  | <b>PORCN</b>     | porcupine homolog (Drosophila)                                      | 64840  |
|  |  | <b>TNFRSF14</b>  | tumor necrosis factor receptor superfamily, member 14 (human)       | 8764   |
|  |  | <b>OSTM1</b>     | osteopetrosis associated transmembrane protein 1                    | 28962  |
|  |  | <b>MEF2A</b>     | myocyte enhancer factor 2A                                          | 4205   |
|  |  | <b>PRRG1</b>     | proline rich Gla (G-carboxyglutamic acid) 1                         | 5638   |
|  |  | <b>MSL3</b>      | male-specific lethal 3 homolog (Drosophila)                         | 10943  |
|  |  | <b>PSMB10</b>    | proteasome (prosome, macropain) subunit, beta type, 10              | 5699   |
|  |  | <b>NHLRC3</b>    | NHL repeat containing 3                                             | 387921 |
|  |  | <b>SULT1A3</b>   | sulfotransferase family, cytosolic, 1A, phenol-preferring, member 3 | 6818   |
|  |  | <b>STK17B</b>    | serine/threonine kinase 17b                                         | 9262   |
|  |  | <b>TPM1</b>      | tropomyosin 1 (alpha)                                               | 7168   |
|  |  | <b>CFLAR</b>     | CASP8 and FADD-like apoptosis regulator                             | 8837   |
|  |  | <b>TGM1</b>      | transglutaminase 1 (K polypeptide epidermal type I, proteinase 3)   | 7051   |
|  |  | <b>C5orf41</b>   | chromosome 5 open reading frame 41                                  | 153222 |
|  |  | <b>BST2</b>      | bone marrow stromal cell antigen 2                                  | 684    |
|  |  | <b>SLC27A2</b>   | solute carrier family 27 (fatty acid transporter), member 2         | 11001  |

|  |                  |                                                             |        |
|--|------------------|-------------------------------------------------------------|--------|
|  | <b>ZNF431</b>    | zinc finger protein 431                                     | 170959 |
|  | <b>MAPRE2</b>    | microtubule-associated protein, RP/EB family, member 2      | 10982  |
|  | <b>LGALS3BP</b>  | lectin, galactoside-binding, soluble, 3 binding protein     | 3959   |
|  | <b>ABAT</b>      | 4-aminobutyrate aminotransferase                            | 18     |
|  | <b>LRRFIP1</b>   | leucine rich repeat (in FLII) interacting protein 1         | 9208   |
|  | <b>DUSP5</b>     | dual specificity phosphatase 5                              | 1847   |
|  | <b>DAB2</b>      | disabled homolog 2, mitogen-responsive phosphoprotein       | 1601   |
|  | <b>PHF15</b>     | PHD finger protein 15                                       | 23338  |
|  | <b>MTMR10</b>    | myotubularin related protein 10                             | 54893  |
|  | <b>CSNK1G1</b>   | casein kinase 1, gamma 1                                    | 53944  |
|  | <b>KLF7</b>      | Kruppel-like factor 7 (ubiquitous)                          | 8609   |
|  | <b>TRIM14</b>    | tripartite motif-containing 14                              | 9830   |
|  | <b>RICTOR</b>    | RPTOR independent companion of MTOR, complex 2              | 253260 |
|  | <b>PTK6</b>      | PTK6 protein tyrosine kinase 6                              | 5753   |
|  | <b>SMPDL3B</b>   | sphingomyelin phosphodiesterase, acid-like 3B               | 27293  |
|  | <b>C12orf56</b>  | chromosome 12 open reading frame 56                         | 115749 |
|  | <b>CPEB1</b>     | cytoplasmic polyadenylation element binding protein 1       | 64506  |
|  | <b>PDE8A</b>     | phosphodiesterase 8A                                        | 5151   |
|  | <b>ITGA5</b>     | integrin, alpha 5 (fibronectin receptor, alpha polypeptide) | 3678   |
|  | <b>RAB19</b>     | RAB19, member RAS oncogene family                           | 401409 |
|  | <b>CADPS2</b>    | Ca <sup>++</sup> -dependent secretion activator 2           | 93664  |
|  | <b>PGM2L1</b>    | phosphoglucomutase 2-like 1                                 | 283209 |
|  | <b>IL6ST</b>     | interleukin 6 signal transducer (gp130, oncostatin M recep  | 3572   |
|  | <b>RASSF6</b>    | Ras association (RalGDS/AF-6) domain family member 6        | 166824 |
|  | <b>RAB27A</b>    | RAB27A, member RAS oncogene family                          | 5873   |
|  | <b>APOL3</b>     | apolipoprotein L, 3                                         | 80833  |
|  | <b>RHOF</b>      | ras homolog gene family, member F (in filopodia)            | 54509  |
|  | <b>FLJ32810</b>  | Rho-type GTPase-activating protein FLJ32810                 | 143872 |
|  | <b>SLC38A4</b>   | solute carrier family 38, member 4                          | 55089  |
|  | <b>C9orf167</b>  | chromosome 9 open reading frame 167                         | 54863  |
|  | <b>CITED2</b>    | Cbp/p300-interacting transactivator, with Glu/Asp-rich car  | 10370  |
|  | <b>FILIP1L</b>   | filamin A interacting protein 1-like                        | 11259  |
|  | <b>SERINC2</b>   | serine incorporator 2                                       | 347735 |
|  | <b>EMB</b>       | embigin homolog (mouse)                                     | 133418 |
|  | <b>SECISBP2L</b> | SECIS binding protein 2-like                                | 9728   |
|  | <b>MICB</b>      | MHC class I polypeptide-related sequence B                  | 4277   |
|  | <b>TMOD3</b>     | tropomodulin 3 (ubiquitous)                                 | 29766  |
|  | <b>TMEM133</b>   | transmembrane protein 133                                   | 83935  |
|  | <b>RIPK1</b>     | receptor (TNFRSF)-interacting serine-threonine kinase 1     | 8737   |
|  | <b>PMAIP1</b>    | phorbol-12-myristate-13-acetate-induced protein 1           | 5366   |
|  | <b>REPS2</b>     | RALBP1 associated Eps domain containing 2                   | 9185   |

|  |                  |                                                                   |        |
|--|------------------|-------------------------------------------------------------------|--------|
|  | <b>STEAP3</b>    | STEAP family member 3                                             | 55240  |
|  | <b>UNC93B1</b>   | unc-93 homolog B1 ( <i>C. elegans</i> )                           | 81622  |
|  | <b>IRS1</b>      | insulin receptor substrate 1                                      | 3667   |
|  | <b>TTYH2</b>     | tweety homolog 2 ( <i>Drosophila</i> )                            | 94015  |
|  | <b>C1orf116</b>  | chromosome 1 open reading frame 116                               | 79098  |
|  | <b>TLL2</b>      | tolloid-like 2                                                    | 7093   |
|  | <b>ARL14</b>     | ADP-ribosylation factor-like 14                                   | 80117  |
|  | <b>STARD3NL</b>  | STARD3 N-terminal like                                            | 83930  |
|  | <b>TEX9</b>      | testis expressed 9                                                | 374618 |
|  | <b>CTSH</b>      | cathepsin H                                                       | 1512   |
|  | <b>ASB9</b>      | ankyrin repeat and SOCS box-containing 9                          | 140462 |
|  | <b>LCA5</b>      | Leber congenital amaurosis 5                                      | 167691 |
|  | <b>STAT5A</b>    | signal transducer and activator of transcription 5A               | 6776   |
|  | <b>SNX33</b>     | sorting nexin 33                                                  | 257364 |
|  | <b>PLEKHA7</b>   | pleckstrin homology domain containing, family A member            | 144100 |
|  | <b>TBC1D2B</b>   | TBC1 domain family, member 2B                                     | 23102  |
|  | <b>CXCL2</b>     | chemokine (C-X-C motif) ligand 2                                  | 2920   |
|  | <b>SLC25A20</b>  | solute carrier family 25 (carnitine/acylcarnitine translocase)    | 788    |
|  | <b>BCAR3</b>     | breast cancer anti-estrogen resistance 3                          | 8412   |
|  | <b>TRAFD1</b>    | TRAF-type zinc finger domain containing 1                         | 10906  |
|  | <b>PADI1</b>     | peptidyl arginine deiminase, type I                               | 29943  |
|  | <b>UBE2L6</b>    | ubiquitin-conjugating enzyme E2L 6                                | 9246   |
|  | <b>PLAUR</b>     | plasminogen activator, urokinase receptor                         | 5329   |
|  | <b>AS3MT</b>     | arsenic (+3 oxidation state) methyltransferase                    | 57412  |
|  | <b>FAM63B</b>    | family with sequence similarity 63, member B                      | 54629  |
|  | <b>MT2A</b>      | metallothionein 2A                                                | 4502   |
|  | <b>ELAVL2</b>    | ELAV (embryonic lethal, abnormal vision, <i>Drosophila</i> )-like | 1993   |
|  | <b>HIVP2</b>     | human immunodeficiency virus type I enhancer binding pr           | 3097   |
|  | <b>IGF1R</b>     | insulin-like growth factor 1 receptor                             | 3480   |
|  | <b>LOC129293</b> | hypothetical protein LOC129293                                    | 129293 |
|  | <b>HLA-DMA</b>   | major histocompatibility complex, class II, DM alpha              | 3108   |
|  | <b>HLA-DMA</b>   | major histocompatibility complex, class II, DM alpha              | 3108   |
|  | <b>COL4A1</b>    | collagen, type IV, alpha 1                                        | 1282   |
|  | <b>BLZF1</b>     | basic leucine zipper nuclear factor 1                             | 8548   |
|  | <b>ERAP1</b>     | endoplasmic reticulum aminopeptidase 1                            | 51752  |
|  | <b>FNDC3A</b>    | fibronectin type III domain containing 3A                         | 22862  |
|  | <b>OLR1</b>      | oxidized low density lipoprotein (lectin-like) receptor 1         | 4973   |
|  | <b>HLA-DMA</b>   | major histocompatibility complex, class II, DM alpha              | 3108   |
|  | <b>PCDH1</b>     | protocadherin 1                                                   | 5097   |
|  | <b>LHFP</b>      | lipoma HMGIC fusion partner                                       | 10186  |
|  | <b>ZFP36</b>     | zinc finger protein 36, C3H type, homolog (mouse)                 | 7538   |

|  |  |                  |                                                             |        |
|--|--|------------------|-------------------------------------------------------------|--------|
|  |  | <b>LIFR</b>      | leukemia inhibitory factor receptor alpha                   | 3977   |
|  |  | <b>RAB8B</b>     | RAB8B, member RAS oncogene family                           | 51762  |
|  |  | <b>TNIK</b>      | TRAF2 and NCK interacting kinase                            | 23043  |
|  |  | <b>NTN4</b>      | netrin 4                                                    | 59277  |
|  |  | <b>PDE4DIP</b>   | phosphodiesterase 4D interacting protein                    | 9659   |
|  |  | <b>SAA1</b>      | serum amyloid A1                                            | 6288   |
|  |  | <b>TJP2</b>      | tight junction protein 2 (zona occludens 2)                 | 9414   |
|  |  | <b>C10orf10</b>  | chromosome 10 open reading frame 10                         | 11067  |
|  |  | <b>PARP12</b>    | poly (ADP-ribose) polymerase family, member 12              | 64761  |
|  |  | <b>HLA-DQB2</b>  | major histocompatibility complex, class II, DQ beta 2       | 3120   |
|  |  | <b>EFTUD1</b>    | elongation factor Tu GTP binding domain containing 1        | 79631  |
|  |  | <b>RGNEF</b>     | Rho-guanine nucleotide exchange factor                      | 64283  |
|  |  | <b>ADAR</b>      | adenosine deaminase, RNA-specific                           | 103    |
|  |  | <b>BAK1</b>      | BCL2-antagonist/killer 1                                    | 578    |
|  |  | <b>ADRB2</b>     | adrenergic, beta-2-, receptor, surface                      | 154    |
|  |  | <b>MVP</b>       | major vault protein                                         | 9961   |
|  |  | <b>ERG</b>       | v-ets erythroblastosis virus E26 oncogene homolog (avian)   | 2078   |
|  |  | <b>FHOD3</b>     | formin homology 2 domain containing 3                       | 80206  |
|  |  | <b>PION</b>      | pigeon homolog (Drosophila)                                 | 54103  |
|  |  | <b>PRR5L</b>     | proline rich 5 like                                         | 79899  |
|  |  | <b>ETV7</b>      | ets variant 7                                               | 51513  |
|  |  | <b>DOC2B</b>     | double C2-like domains, beta                                | 8447   |
|  |  | <b>FXYD5</b>     | FXYD domain containing ion transport regulator 5            | 53827  |
|  |  | <b>RNF19B</b>    | ring finger protein 19B                                     | 127544 |
|  |  | <b>JUNB</b>      | jun B proto-oncogene                                        | 3726   |
|  |  | <b>MNS1</b>      | meiosis-specific nuclear structural 1                       | 55329  |
|  |  | <b>GSN</b>       | gelsolin (amyloidosis, Finnish type)                        | 2934   |
|  |  | <b>FAM40B</b>    | family with sequence similarity 40, member B                | 57464  |
|  |  | <b>COL12A1</b>   | collagen, type XII, alpha 1                                 | 1303   |
|  |  | <b>TNFAIP3</b>   | tumor necrosis factor, alpha-induced protein 3              | 7128   |
|  |  | <b>DIO2</b>      | deiodinase, iodothyronine, type II                          | 1734   |
|  |  | <b>CLU</b>       | clusterin                                                   | 1191   |
|  |  | <b>IRF7</b>      | interferon regulatory factor 7                              | 3665   |
|  |  | <b>SLC39A8</b>   | solute carrier family 39 (zinc transporter), member 8       | 64116  |
|  |  | <b>RAB27B</b>    | RAB27B, member RAS oncogene family                          | 5874   |
|  |  | <b>SLC12A6</b>   | solute carrier family 12 (potassium/chloride transporters), | 9990   |
|  |  | <b>PAQR5</b>     | progesterin and adipoQ receptor family member V             | 54852  |
|  |  | <b>SERPINB1</b>  | serpin peptidase inhibitor, clade B (ovalbumin), member 1   | 1992   |
|  |  | <b>PAM</b>       | peptidylglycine alpha-amidating monooxygenase               | 5066   |
|  |  | <b>HIST3H2BB</b> | histone cluster 3, H2bb                                     | 128312 |
|  |  | <b>CORO6</b>     | coronin 6                                                   | 84940  |

|  |                  |                                                           |        |
|--|------------------|-----------------------------------------------------------|--------|
|  | <b>MAP2</b>      | microtubule-associated protein 2                          | 4133   |
|  | <b>ODF2L</b>     | outer dense fiber of sperm tails 2-like                   | 57489  |
|  | <b>SGK1</b>      | serum/glucocorticoid regulated kinase 1                   | 6446   |
|  | <b>KCNK5</b>     | potassium channel, subfamily K, member 5                  | 8645   |
|  | <b>BTN3A1</b>    | butyrophilin, subfamily 3, member A1                      | 11119  |
|  | <b>MICB</b>      | MHC class I polypeptide-related sequence B                | 4277   |
|  | <b>SLC16A4</b>   | solute carrier family 16, member 4 (monocarboxylic acid t | 9122   |
|  | <b>PNPT1</b>     | polyribonucleotide nucleotidyltransferase 1               | 87178  |
|  | <b>SLC41A2</b>   | solute carrier family 41, member 2                        | 84102  |
|  | <b>BIRC3</b>     | baculoviral IAP repeat-containing 3                       | 330    |
|  | <b>HLA-DQB2</b>  | major histocompatibility complex, class II, DQ beta 2     | 3120   |
|  | <b>AMY2A</b>     | amylase, alpha 2A (pancreatic)                            | 279    |
|  | <b>PELO</b>      | pelota homolog (Drosophila)                               | 53918  |
|  | <b>TMEM173</b>   | transmembrane protein 173                                 | 340061 |
|  | <b>SLC35D2</b>   | solute carrier family 35, member D2                       | 11046  |
|  | <b>GPR126</b>    | G protein-coupled receptor 126                            | 57211  |
|  | <b>DRAM1</b>     | DNA-damage regulated autophagy modulator 1                | 55332  |
|  | <b>HIST2H2BF</b> | histone cluster 2, H2bf                                   | 440689 |
|  | <b>ITPR2</b>     | inositol 1,4,5-triphosphate receptor, type 2              | 3709   |
|  | <b>LHFPL2</b>    | lipoma HMGIC fusion partner-like 2                        | 10184  |
|  | <b>PCMTD2</b>    | protein-L-isoaspartate (D-aspartate) O-methyltransferase  | 55251  |
|  | <b>C3orf67</b>   | chromosome 3 open reading frame 67                        | 200844 |
|  | <b>GPNMB</b>     | glycoprotein (transmembrane) nmb                          | 10457  |
|  | <b>ALDH1A2</b>   | aldehyde dehydrogenase 1 family, member A2                | 8854   |
|  | <b>BLNK</b>      | B-cell linker                                             | 29760  |
|  | <b>GULP1</b>     | GULP, engulfment adaptor PTB domain containing 1          | 51454  |
|  | <b>UCA1</b>      | urothelial cancer associated 1 (non-protein coding)       | 652995 |
|  | <b>TBC1D2B</b>   | TBC1 domain family, member 2B                             | 23102  |
|  | <b>PPM1K</b>     | protein phosphatase 1K (PP2C domain containing)           | 152926 |
|  | <b>SOCS3</b>     | suppressor of cytokine signaling 3                        | 9021   |
|  | <b>ITGB8</b>     | integrin, beta 8                                          | 3696   |
|  | <b>MPZL2</b>     | myelin protein zero-like 2                                | 10205  |
|  | <b>VWDE</b>      | von Willebrand factor D and EGF domains                   | 221806 |
|  | <b>SH3BGRL2</b>  | SH3 domain binding glutamic acid-rich protein like 2      | 83699  |
|  | <b>CAB39</b>     | calcium binding protein 39                                | 51719  |
|  | <b>HOMER3</b>    | homer homolog 3 (Drosophila)                              | 9454   |
|  | <b>GRAMD3</b>    | GRAM domain containing 3                                  | 65983  |
|  | <b>BTN3A2</b>    | butyrophilin, subfamily 3, member A2                      | 11118  |
|  | <b>CDH13</b>     | cadherin 13, H-cadherin (heart)                           | 1012   |
|  | <b>AREG</b>      | amphiregulin                                              | 374    |
|  | <b>SPATS2L</b>   | spermatogenesis associated, serine-rich 2-like            | 26010  |

|  |                     |                                                             |        |
|--|---------------------|-------------------------------------------------------------|--------|
|  | <b>GNE</b>          | glucosamine (UDP-N-acetyl)-2-epimerase/N-acetylmannos       | 10020  |
|  | <b>CYLD</b>         | cylindromatosis (turban tumor syndrome)                     | 1540   |
|  | <b>KCNN4</b>        | potassium intermediate/small conductance calcium-activa     | 3783   |
|  | <b>PLEKHA4</b>      | pleckstrin homology domain containing, family A (phospho    | 57664  |
|  | <b>PRIC285</b>      | peroxisomal proliferator-activated receptor A interacting c | 85441  |
|  | <b>DENND4C</b>      | DENN/MADD domain containing 4C                              | 55667  |
|  | <b>HEG1</b>         | HEG homolog 1 (zebrafish)                                   | 57493  |
|  | <b>PION</b>         | pigeon homolog (Drosophila)                                 | 54103  |
|  | <b>PLAU</b>         | plasminogen activator, urokinase                            | 5328   |
|  | <b>MMP28</b>        | matrix metalloproteinase 28                                 | 79148  |
|  | <b>HLA-C</b>        | major histocompatibility complex, class I, C                | 3107   |
|  | <b>MORN4</b>        | MORN repeat containing 4                                    | 118812 |
|  | <b>NKX1-2</b>       | NK1 homeobox 2                                              | 390010 |
|  | <b>PRSS23</b>       | protease, serine, 23                                        | 11098  |
|  | <b>EDNRA</b>        | endothelin receptor type A                                  | 1909   |
|  | <b>LAP3</b>         | leucine aminopeptidase 3                                    | 51056  |
|  | <b>LRP1B</b>        | low density lipoprotein-related protein 1B (deleted in tum  | 53353  |
|  | <b>SQRDL</b>        | sulfide quinone reductase-like (yeast)                      | 58472  |
|  | <b>POPDC3</b>       | popeye domain containing 3                                  | 64208  |
|  | <b>GSDMB</b>        | gasdermin B                                                 | 55876  |
|  | <b>DNAJB4</b>       | DnaJ (Hsp40) homolog, subfamily B, member 4                 | 11080  |
|  | <b>HLA-E</b>        | major histocompatibility complex, class I, E                | 3133   |
|  | <b>EHD4</b>         | EH-domain containing 4                                      | 30844  |
|  | <b>PALMD</b>        | palmdelphin                                                 | 54873  |
|  | <b>HLA-C</b>        | major histocompatibility complex, class I, C                | 3107   |
|  | <b>RARRES3</b>      | retinoic acid receptor responder (tazarotene induced) 3     | 5920   |
|  | <b>BATF2</b>        | basic leucine zipper transcription factor, ATF-like 2       | 116071 |
|  | <b>TRIM6-TRIM34</b> | TRIM6-TRIM34 readthrough transcript                         | 445372 |
|  | <b>NT5C3</b>        | 5'-nucleotidase, cytosolic III                              | 51251  |
|  | <b>LGALS1</b>       | lectin, galactoside-binding, soluble, 1                     | 3956   |
|  | <b>GSDMC</b>        | gasdermin C                                                 | 56169  |
|  | <b>ERAP2</b>        | endoplasmic reticulum aminopeptidase 2                      | 64167  |
|  | <b>CRABP2</b>       | cellular retinoic acid binding protein 2                    | 1382   |
|  | <b>HLA-E</b>        | major histocompatibility complex, class I, E                | 3133   |
|  | <b>HLA-E</b>        | major histocompatibility complex, class I, E                | 3133   |
|  | <b>PCMTD2</b>       | protein-L-isoaspartate (D-aspartate) O-methyltransferase c  | 55251  |
|  | <b>TCIRG1</b>       | T-cell, immune regulator 1, ATPase, H+ transporting, lysosc | 10312  |
|  | <b>PLA2G4A</b>      | phospholipase A2, group IVA (cytosolic, calcium-dependen    | 5321   |
|  | <b>TSPYL5</b>       | TSPY-like 5                                                 | 85453  |
|  | <b>TAOK3</b>        | TAO kinase 3                                                | 51347  |
|  | <b>SNX7</b>         | sorting nexin 7                                             | 51375  |



|  |  |                  |                                                           |        |
|--|--|------------------|-----------------------------------------------------------|--------|
|  |  | <b>FAS</b>       | Fas (TNF receptor superfamily, member 6)                  | 355    |
|  |  | <b>MT1F</b>      | metallothionein 1F                                        | 4494   |
|  |  | <b>MUC20</b>     | mucin 20, cell surface associated                         | 200958 |
|  |  | <b>FGD6</b>      | FYVE, RhoGEF and PH domain containing 6                   | 55785  |
|  |  | <b>LRMP</b>      | lymphoid-restricted membrane protein                      | 4033   |
|  |  | <b>HLA-DRA</b>   | major histocompatibility complex, class II, DR alpha      | 3122   |
|  |  | <b>ATF3</b>      | activating transcription factor 3                         | 467    |
|  |  | <b>HLA-G</b>     | major histocompatibility complex, class I, G              | 3135   |
|  |  | <b>INPP1</b>     | inositol polyphosphate-1-phosphatase                      | 3628   |
|  |  | <b>CXCL1</b>     | chemokine (C-X-C motif) ligand 1 (melanoma growth stimu   | 2919   |
|  |  | <b>AREG</b>      | amphiregulin                                              | 374    |
|  |  | <b>FOSB</b>      | FBJ murine osteosarcoma viral oncogene homolog B          | 2354   |
|  |  | <b>GLT8D2</b>    | glycosyltransferase 8 domain containing 2                 | 83468  |
|  |  | <b>DBC1</b>      | deleted in bladder cancer 1                               | 1620   |
|  |  | <b>GBP5</b>      | guanylate binding protein 5                               | 115362 |
|  |  | <b>GATA3</b>     | GATA binding protein 3                                    | 2625   |
|  |  | <b>HIST2H2BF</b> | histone cluster 2, H2bf                                   | 440689 |
|  |  | <b>SERPINB13</b> | serpin peptidase inhibitor, clade B (ovalbumin), member 1 | 5275   |
|  |  | <b>EPAS1</b>     | endothelial PAS domain protein 1                          | 2034   |
|  |  | <b>CMTM7</b>     | CKLF-like MARVEL transmembrane domain containing 7        | 112616 |
|  |  | <b>AMIGO2</b>    | adhesion molecule with Ig-like domain 2                   | 347902 |
|  |  | <b>HLA-A</b>     | major histocompatibility complex, class I, A              | 3105   |
|  |  | <b>FAM129A</b>   | family with sequence similarity 129, member A             | 116496 |
|  |  | <b>CD36</b>      | CD36 molecule (thrombospondin receptor)                   | 948    |
|  |  | <b>PTPRB</b>     | protein tyrosine phosphatase, receptor type, B            | 5787   |
|  |  | <b>TRERF1</b>    | transcriptional regulating factor 1                       | 55809  |
|  |  | <b>TLR4</b>      | toll-like receptor 4                                      | 7099   |
|  |  | <b>ST5</b>       | suppression of tumorigenicity 5                           | 6764   |
|  |  | <b>HLA-DRA</b>   | major histocompatibility complex, class II, DR alpha      | 3122   |
|  |  | <b>LMO7</b>      | LIM domain 7                                              | 4008   |
|  |  | <b>CARD6</b>     | caspase recruitment domain family, member 6               | 84674  |
|  |  | <b>HSH2D</b>     | hematopoietic SH2 domain containing                       | 84941  |
|  |  | <b>CFHR1</b>     | complement factor H-related 1                             | 3078   |
|  |  | <b>EMP3</b>      | epithelial membrane protein 3                             | 2014   |
|  |  | <b>HLA-A</b>     | major histocompatibility complex, class I, A              | 3105   |
|  |  | <b>CEACAM1</b>   | carcinoembryonic antigen-related cell adhesion molecule   | 634    |
|  |  | <b>PCLO</b>      | piccolo (presynaptic cytomatrix protein)                  | 27445  |
|  |  | <b>DUSP6</b>     | dual specificity phosphatase 6                            | 1848   |
|  |  | <b>CTGF</b>      | connective tissue growth factor                           | 1490   |
|  |  | <b>TP53I3</b>    | tumor protein p53 inducible protein 3                     | 9540   |
|  |  | <b>PCMTD2</b>    | protein-L-isoaspartate (D-aspartate) O-methyltransferase  | 55251  |

|  |                 |                                                             |        |
|--|-----------------|-------------------------------------------------------------|--------|
|  | <b>PCMTD2</b>   | protein-L-isoaspartate (D-aspartate) O-methyltransferase    | 55251  |
|  | <b>MUC4</b>     | mucin 4, cell surface associated                            | 4585   |
|  | <b>LRRFIP1</b>  | leucine rich repeat (in FLII) interacting protein 1         | 9208   |
|  | <b>SLC37A2</b>  | solute carrier family 37 (glycerol-3-phosphate transporter) | 219855 |
|  | <b>MACC1</b>    | metastasis associated in colon cancer 1                     | 346389 |
|  | <b>CD86</b>     | CD86 molecule                                               | 942    |
|  | <b>TIMP2</b>    | TIMP metalloproteinase inhibitor 2                          | 7077   |
|  | <b>KLF6</b>     | Kruppel-like factor 6                                       | 1316   |
|  | <b>RASSF5</b>   | Ras association (RalGDS/AF-6) domain family member 5        | 83593  |
|  | <b>TCN2</b>     | transcobalamin II; macrocytic anemia                        | 6948   |
|  | <b>HLA-J</b>    | major histocompatibility complex, class I, J (pseudogene)   | 3137   |
|  | <b>IRF9</b>     | interferon regulatory factor 9                              | 10379  |
|  | <b>CAMK4</b>    | calcium/calmodulin-dependent protein kinase IV              | 814    |
|  | <b>ARHGAP23</b> | Rho GTPase activating protein 23                            | 57636  |
|  | <b>HLA-G</b>    | major histocompatibility complex, class I, G                | 3135   |
|  | <b>HLA-G</b>    | major histocompatibility complex, class I, G                | 3135   |
|  | <b>GPRC5A</b>   | G protein-coupled receptor, family C, group 5, member A     | 9052   |
|  | <b>EIF2AK2</b>  | eukaryotic translation initiation factor 2-alpha kinase 2   | 5610   |
|  | <b>CLDN1</b>    | claudin 1                                                   | 9076   |
|  | <b>OPTN</b>     | optineurin                                                  | 10133  |
|  | <b>IFI16</b>    | interferon, gamma-inducible protein 16                      | 3428   |
|  | <b>CCDC68</b>   | coiled-coil domain containing 68                            | 80323  |
|  | <b>IGFBP7</b>   | insulin-like growth factor binding protein 7                | 3490   |
|  | <b>RAB30</b>    | RAB30, member RAS oncogene family                           | 27314  |
|  | <b>LYPD1</b>    | LY6/PLAUR domain containing 1                               | 116372 |
|  | <b>SP140L</b>   | SP140 nuclear body protein-like                             | 93349  |
|  | <b>CYBA</b>     | cytochrome b-245, alpha polypeptide                         | 1535   |
|  | <b>DNAH5</b>    | dynein, axonemal, heavy chain 5                             | 1767   |
|  | <b>SIAE</b>     | sialic acid acetyltransferase                               | 54414  |
|  | <b>B2M</b>      | beta-2-microglobulin                                        | 567    |
|  | <b>IL1B</b>     | interleukin 1, beta                                         | 3553   |
|  | <b>PDZD2</b>    | PDZ domain containing 2                                     | 23037  |
|  | <b>ASAM</b>     | adipocyte-specific adhesion molecule                        | 79827  |
|  | <b>SOCS2</b>    | suppressor of cytokine signaling 2                          | 8835   |
|  | <b>CCL5</b>     | chemokine (C-C motif) ligand 5                              | 6352   |
|  | <b>CYB5A</b>    | cytochrome b5 type A (microsomal)                           | 1528   |
|  | <b>TSPAN1</b>   | tetraspanin 1                                               | 10103  |
|  | <b>NLRC5</b>    | NLR family, CARD domain containing 5                        | 84166  |
|  | <b>TIMP1</b>    | TIMP metalloproteinase inhibitor 1                          | 7076   |
|  | <b>HLA-A</b>    | major histocompatibility complex, class I, A                | 3105   |
|  | <b>RABGAP1L</b> | RAB GTPase activating protein 1-like                        | 9910   |

|  |  |                 |                                                             |        |
|--|--|-----------------|-------------------------------------------------------------|--------|
|  |  | <b>TLR3</b>     | toll-like receptor 3                                        | 7098   |
|  |  | <b>EYA2</b>     | eyes absent homolog 2 (Drosophila)                          | 2139   |
|  |  | <b>C19orf66</b> | chromosome 19 open reading frame 66                         | 55337  |
|  |  | <b>ZNFX1</b>    | zinc finger, NFX1-type containing 1                         | 57169  |
|  |  | <b>CYP2J2</b>   | cytochrome P450, family 2, subfamily J, polypeptide 2       | 1573   |
|  |  | <b>KIAA1370</b> | KIAA1370                                                    | 56204  |
|  |  | <b>HDAC9</b>    | histone deacetylase 9                                       | 9734   |
|  |  | <b>PHF11</b>    | PHD finger protein 11                                       | 51131  |
|  |  | <b>LXN</b>      | latexin                                                     | 56925  |
|  |  | <b>ST6GAL1</b>  | ST6 beta-galactosamide alpha-2,6-sialyltransferase 1        | 6480   |
|  |  | <b>DUSP1</b>    | dual specificity phosphatase 1                              | 1843   |
|  |  | <b>CA2</b>      | carbonic anhydrase II                                       | 760    |
|  |  | <b>FERMT2</b>   | fermitin family homolog 2 (Drosophila)                      | 10979  |
|  |  | <b>PML</b>      | promyelocytic leukemia                                      | 5371   |
|  |  | <b>SERPINI1</b> | serpin peptidase inhibitor, clade I (neuroserpin), member 1 | 5274   |
|  |  | <b>ICAM1</b>    | intercellular adhesion molecule 1                           | 3383   |
|  |  | <b>TRIM5</b>    | tripartite motif-containing 5                               | 85363  |
|  |  | <b>BTN3A3</b>   | butyrophilin, subfamily 3, member A3                        | 10384  |
|  |  | <b>MXD1</b>     | MAX dimerization protein 1                                  | 4084   |
|  |  | <b>HLA-DRA</b>  | major histocompatibility complex, class II, DR alpha        | 3122   |
|  |  | <b>HLA-J</b>    | major histocompatibility complex, class I, J (pseudogene)   | 3137   |
|  |  | <b>TM4SF19</b>  | transmembrane 4 L six family member 19                      | 116211 |
|  |  | <b>GPR110</b>   | G protein-coupled receptor 110                              | 266977 |
|  |  | <b>IL1RN</b>    | interleukin 1 receptor antagonist                           | 3557   |
|  |  | <b>C1orf21</b>  | chromosome 1 open reading frame 21                          | 81563  |
|  |  | <b>DNAJC12</b>  | DnaJ (Hsp40) homolog, subfamily C, member 12                | 56521  |
|  |  | <b>UGCG</b>     | UDP-glucose ceramide glucosyltransferase                    | 7357   |
|  |  | <b>TAP2</b>     | transporter 2, ATP-binding cassette, sub-family B (MDR/TA   | 6891   |
|  |  | <b>GLCCI1</b>   | glucocorticoid induced transcript 1                         | 113263 |
|  |  | <b>TAP2</b>     | transporter 2, ATP-binding cassette, sub-family B (MDR/TA   | 6891   |
|  |  | <b>IL1R1</b>    | interleukin 1 receptor, type I                              | 3554   |
|  |  | <b>FRMD5</b>    | FERM domain containing 5                                    | 84978  |
|  |  | <b>GPR37</b>    | G protein-coupled receptor 37 (endothelin receptor type B   | 2861   |
|  |  | <b>TFPI2</b>    | tissue factor pathway inhibitor 2                           | 7980   |
|  |  | <b>CA13</b>     | carbonic anhydrase XIII                                     | 377677 |
|  |  | <b>FLI1</b>     | Friend leukemia virus integration 1                         | 2313   |
|  |  | <b>TRIM38</b>   | tripartite motif-containing 38                              | 10475  |
|  |  | <b>TAP2</b>     | transporter 2, ATP-binding cassette, sub-family B (MDR/TA   | 6891   |
|  |  | <b>SLC47A2</b>  | solute carrier family 47, member 2                          | 146802 |
|  |  | <b>CXXC5</b>    | CXXC finger 5                                               | 51523  |
|  |  | <b>ETS1</b>     | v-ets erythroblastosis virus E26 oncogene homolog 1 (avia   | 2113   |

|  |          |                                                           |        |
|--|----------|-----------------------------------------------------------|--------|
|  | HLA-B    | major histocompatibility complex, class I, B              | 3106   |
|  | KIAA0495 | KIAA0495                                                  | 57212  |
|  | PSMB8    | proteasome (prosome, macropain) subunit, beta type, 8 (l  | 5696   |
|  | PSMB8    | proteasome (prosome, macropain) subunit, beta type, 8 (l  | 5696   |
|  | PSMB8    | proteasome (prosome, macropain) subunit, beta type, 8 (l  | 5696   |
|  | NMI      | N-myc (and STAT) interactor                               | 9111   |
|  | NEDD4    | neural precursor cell expressed, developmentally down-re  | 4734   |
|  | PLSCR1   | phospholipid scramblase 1                                 | 5359   |
|  | ALCAM    | activated leukocyte cell adhesion molecule                | 214    |
|  | F3       | coagulation factor III (thromboplastin, tissue factor)    | 2152   |
|  | FKBP5    | FK506 binding protein 5                                   | 2289   |
|  | TDRD7    | tudor domain containing 7                                 | 23424  |
|  | SERPINB7 | serpin peptidase inhibitor, clade B (ovalbumin), member 7 | 8710   |
|  | TRIM21   | tripartite motif-containing 21                            | 6737   |
|  | TRERF1   | transcriptional regulating factor 1                       | 55809  |
|  | APOL6    | apolipoprotein L, 6                                       | 80830  |
|  | CAMK2N1  | calcium/calmodulin-dependent protein kinase II inhibitor  | 55450  |
|  | CH25H    | cholesterol 25-hydroxylase                                | 9023   |
|  | HLA-B    | major histocompatibility complex, class I, B              | 3106   |
|  | DTX3L    | deltex 3-like (Drosophila)                                | 151636 |
|  | HIST1H3J | histone cluster 1, H3j                                    | 8356   |
|  | IDO1     | indoleamine 2,3-dioxygenase 1                             | 3620   |
|  | CTSS     | cathepsin S                                               | 1520   |
|  | FGF5     | fibroblast growth factor 5                                | 2250   |
|  | NT5C3    | 5'-nucleotidase, cytosolic III                            | 51251  |
|  | C9orf84  | chromosome 9 open reading frame 84                        | 158401 |
|  | TGFBI    | transforming growth factor, beta-induced, 68kDa           | 7045   |
|  | HLA-B    | major histocompatibility complex, class I, B              | 3106   |
|  | SYNPO2   | synaptopodin 2                                            | 171024 |
|  | SAMHD1   | SAM domain and HD domain 1                                | 25939  |
|  | PDCD1LG2 | programmed cell death 1 ligand 2                          | 80380  |
|  | DUSP10   | dual specificity phosphatase 10                           | 11221  |
|  | LAMB2    | laminin, beta 2 (laminin S)                               | 3913   |
|  | FAM83A   | family with sequence similarity 83, member A              | 84985  |
|  | EDIL3    | EGF-like repeats and discoidin I-like domains 3           | 10085  |
|  | PARP14   | poly (ADP-ribose) polymerase family, member 14            | 54625  |
|  | EPHX3    | epoxide hydrolase 3                                       | 79852  |
|  | SEMA3D   | sema domain, immunoglobulin domain (Ig), short basic do   | 223117 |
|  | CDH6     | cadherin 6, type 2, K-cadherin (fetal kidney)             | 1004   |
|  | HLA-F    | major histocompatibility complex, class I, F              | 3134   |
|  | NRG4     | neuregulin 4                                              | 145957 |

|  |  |                 |                                                            |        |
|--|--|-----------------|------------------------------------------------------------|--------|
|  |  | <b>ARSI</b>     | arylsulfatase family, member I                             | 340075 |
|  |  | <b>USP18</b>    | ubiquitin specific peptidase 18                            | 11274  |
|  |  | <b>MUC1</b>     | mucin 1, cell surface associated                           | 4582   |
|  |  | <b>GIPC2</b>    | GIPC PDZ domain containing family, member 2                | 54810  |
|  |  | <b>SLC16A7</b>  | solute carrier family 16, member 7 (monocarboxylic acid t  | 9194   |
|  |  | <b>HLA-F</b>    | major histocompatibility complex, class I, F               | 3134   |
|  |  | <b>HLA-DQB1</b> | major histocompatibility complex, class II, DQ beta 1      | 3119   |
|  |  | <b>IFIT5</b>    | interferon-induced protein with tetratricopeptide repeats  | 24138  |
|  |  | <b>C16orf62</b> | chromosome 16 open reading frame 62                        | 57020  |
|  |  | <b>HTR7</b>     | 5-hydroxytryptamine (serotonin) receptor 7 (adenylate cyc  | 3363   |
|  |  | <b>IFITM3</b>   | interferon induced transmembrane protein 3 (1-8U)          | 10410  |
|  |  | <b>CARD11</b>   | caspase recruitment domain family, member 11               | 84433  |
|  |  | <b>SATB1</b>    | SATB homeobox 1                                            | 6304   |
|  |  | <b>IFITM2</b>   | interferon induced transmembrane protein 2 (1-8D)          | 10581  |
|  |  | <b>DHX58</b>    | DEXH (Asp-Glu-X-His) box polypeptide 58                    | 79132  |
|  |  | <b>HLA-F</b>    | major histocompatibility complex, class I, F               | 3134   |
|  |  | <b>PRR16</b>    | proline rich 16                                            | 51334  |
|  |  | <b>STARD5</b>   | StAR-related lipid transfer (START) domain containing 5    | 80765  |
|  |  | <b>IRF1</b>     | interferon regulatory factor 1                             | 3659   |
|  |  | <b>CXCL11</b>   | chemokine (C-X-C motif) ligand 11                          | 6373   |
|  |  | <b>ABCA1</b>    | ATP-binding cassette, sub-family A (ABC1), member 1        | 19     |
|  |  | <b>IL7</b>      | interleukin 7                                              | 3574   |
|  |  | <b>AKR1C3</b>   | aldo-keto reductase family 1, member C3 (3-alpha hydroxy   | 8644   |
|  |  | <b>MAN1A1</b>   | mannosidase, alpha, class 1A, member 1                     | 4121   |
|  |  | <b>LAMP3</b>    | lysosomal-associated membrane protein 3                    | 27074  |
|  |  | <b>STAT2</b>    | signal transducer and activator of transcription 2, 113kDa | 6773   |
|  |  | <b>KIAA1618</b> | KIAA1618                                                   | 57714  |
|  |  | <b>NT5C3</b>    | 5'-nucleotidase, cytosolic III                             | 51251  |
|  |  | <b>PROS1</b>    | protein S (alpha)                                          | 5627   |
|  |  | <b>FBXO32</b>   | F-box protein 32                                           | 114907 |
|  |  | <b>PROM2</b>    | prominin 2                                                 | 150696 |
|  |  | <b>KYNU</b>     | kynureninase (L-kynurenine hydrolase)                      | 8942   |
|  |  | <b>CCNA1</b>    | cyclin A1                                                  | 8900   |
|  |  | <b>RNF213</b>   | ring finger protein 213                                    | 57674  |
|  |  | <b>PBX3</b>     | pre-B-cell leukemia homeobox 3                             | 5090   |
|  |  | <b>VIM</b>      | vimentin                                                   | 7431   |
|  |  | <b>LRRN1</b>    | leucine rich repeat neuronal 1                             | 57633  |
|  |  | <b>OASL</b>     | 2'-5'-oligoadenylate synthetase-like                       | 8638   |
|  |  | <b>FEZ1</b>     | fasciculation and elongation protein zeta 1 (zygin I)      | 9638   |
|  |  | <b>AMTN</b>     | amelotin                                                   | 401138 |
|  |  | <b>SP100</b>    | SP100 nuclear antigen                                      | 6672   |

|  |          |                                                           |        |
|--|----------|-----------------------------------------------------------|--------|
|  | PROS1    | protein S (alpha)                                         | 5627   |
|  | LBA1     | lupus brain antigen 1                                     | 9881   |
|  | TMEM27   | transmembrane protein 27                                  | 57393  |
|  | GBP3     | guanylate binding protein 3                               | 2635   |
|  | HERC6    | hect domain and RLD 6                                     | 55008  |
|  | TAP1     | transporter 1, ATP-binding cassette, sub-family B (MDR/TA | 6890   |
|  | TAP1     | transporter 1, ATP-binding cassette, sub-family B (MDR/TA | 6890   |
|  | TAP1     | transporter 1, ATP-binding cassette, sub-family B (MDR/TA | 6890   |
|  | MUM1L1   | melanoma associated antigen (mutated) 1-like 1            | 139221 |
|  | ADAM28   | ADAM metallopeptidase domain 28                           | 10863  |
|  | IFI35    | interferon-induced protein 35                             | 3430   |
|  | PVRL3    | poliovirus receptor-related 3                             | 25945  |
|  | NIACR1   | niacin receptor 1                                         | 338442 |
|  | CFB      | complement factor B                                       | 629    |
|  | HSPA2    | heat shock 70kDa protein 2                                | 3306   |
|  | CFB      | complement factor B                                       | 629    |
|  | ACSL5    | acyl-CoA synthetase long-chain family member 5            | 51703  |
|  | CFB      | complement factor B                                       | 629    |
|  | USP18    | ubiquitin specific peptidase 18                           | 11274  |
|  | GDF15    | growth differentiation factor 15                          | 9518   |
|  | SLC43A3  | solute carrier family 43, member 3                        | 29015  |
|  | PSMB9    | proteasome (prosome, macropain) subunit, beta type, 9 (I  | 5698   |
|  | PSMB9    | proteasome (prosome, macropain) subunit, beta type, 9 (I  | 5698   |
|  | PSMB9    | proteasome (prosome, macropain) subunit, beta type, 9 (I  | 5698   |
|  | PARP9    | poly (ADP-ribose) polymerase family, member 9             | 83666  |
|  | CD274    | CD274 molecule                                            | 29126  |
|  | KRT7     | keratin 7                                                 | 3855   |
|  | SAA2     | serum amyloid A2                                          | 6289   |
|  | SLFN11   | schlafen family member 11                                 | 91607  |
|  | CCL2     | chemokine (C-C motif) ligand 2                            | 6347   |
|  | IL1A     | interleukin 1, alpha                                      | 3552   |
|  | MAL      | mal, T-cell differentiation protein                       | 4118   |
|  | FAR2     | fatty acyl CoA reductase 2                                | 55711  |
|  | HLA-DQB1 | major histocompatibility complex, class II, DQ beta 1     | 3119   |
|  | HLA-DQB1 | major histocompatibility complex, class II, DQ beta 1     | 3119   |
|  | STAT1    | signal transducer and activator of transcription 1, 91kDa | 6772   |
|  | GBP2     | guanylate binding protein 2, interferon-inducible         | 2634   |
|  | CCDC80   | coiled-coil domain containing 80                          | 151887 |
|  | ISG15    | ISG15 ubiquitin-like modifier                             | 9636   |
|  | HERC5    | hect domain and RLD 5                                     | 51191  |
|  | AFAP1L2  | actin filament associated protein 1-like 2                | 84632  |

|  |                |                                                              |        |
|--|----------------|--------------------------------------------------------------|--------|
|  | <b>PTGS2</b>   | prostaglandin-endoperoxide synthase 2 (prostaglandin G/H     | 5743   |
|  | <b>CMPK2</b>   | cytidine monophosphate (UMP-CMP) kinase 2, mitochond         | 129607 |
|  | <b>NIACR2</b>  | niacin receptor 2                                            | 8843   |
|  | <b>HCP5</b>    | HLA complex P5                                               | 10866  |
|  | <b>PTGS1</b>   | prostaglandin-endoperoxide synthase 1 (prostaglandin G/H     | 5742   |
|  | <b>IL6</b>     | interleukin 6 (interferon, beta 2)                           | 3569   |
|  | <b>SAMD9</b>   | sterile alpha motif domain containing 9                      | 54809  |
|  | <b>DDX58</b>   | DEAD (Asp-Glu-Ala-Asp) box polypeptide 58                    | 23586  |
|  | <b>HAS2</b>    | hyaluronan synthase 2                                        | 3037   |
|  | <b>IFIH1</b>   | interferon induced with helicase C domain 1                  | 64135  |
|  | <b>DDX60L</b>  | DEAD (Asp-Glu-Ala-Asp) box polypeptide 60-like               | 91351  |
|  | <b>CFI</b>     | complement factor I                                          | 3426   |
|  | <b>UBA7</b>    | ubiquitin-like modifier activating enzyme 7                  | 7318   |
|  | <b>FKBP10</b>  | FK506 binding protein 10, 65 kDa                             | 60681  |
|  | <b>SEMA3A</b>  | sema domain, immunoglobulin domain (Ig), short basic do      | 10371  |
|  | <b>MMP12</b>   | matrix metalloproteinase 12 (macrophage elastase)            | 4321   |
|  | <b>OAS3</b>    | 2'-5'-oligoadenylate synthetase 3, 100kDa                    | 4940   |
|  | <b>CXCL10</b>  | chemokine (C-X-C motif) ligand 10                            | 3627   |
|  | <b>LDLR</b>    | low density lipoprotein receptor                             | 3949   |
|  | <b>DNAJC15</b> | DnaJ (Hsp40) homolog, subfamily C, member 15                 | 29103  |
|  | <b>IFITM1</b>  | interferon induced transmembrane protein 1 (9-27)            | 8519   |
|  | <b>SP110</b>   | SP110 nuclear body protein                                   | 3431   |
|  | <b>OAS2</b>    | 2'-5'-oligoadenylate synthetase 2, 69/71kDa                  | 4939   |
|  | <b>EYA4</b>    | eyes absent homolog 4 (Drosophila)                           | 2070   |
|  | <b>HSPB8</b>   | heat shock 22kDa protein 8                                   | 26353  |
|  | <b>DDX60</b>   | DEAD (Asp-Glu-Ala-Asp) box polypeptide 60                    | 55601  |
|  | <b>IFI44</b>   | interferon-induced protein 44                                | 10561  |
|  | <b>EPST11</b>  | epithelial stromal interaction 1 (breast)                    | 94240  |
|  | <b>LASS3</b>   | LAG1 homolog, ceramide synthase 3                            | 204219 |
|  | <b>CYP24A1</b> | cytochrome P450, family 24, subfamily A, polypeptide 1       | 1591   |
|  | <b>XAF1</b>    | XIAP associated factor 1                                     | 54739  |
|  | <b>IFI6</b>    | interferon, alpha-inducible protein 6                        | 2537   |
|  | <b>IFIT3</b>   | interferon-induced protein with tetratricopeptide repeats    | 3437   |
|  | <b>IFIT2</b>   | interferon-induced protein with tetratricopeptide repeats    | 3433   |
|  | <b>GBP1</b>    | guanylate binding protein 1, interferon-inducible, 67kDa     | 2633   |
|  | <b>MX1</b>     | myxovirus (influenza virus) resistance 1, interferon-inducib | 4599   |
|  | <b>IFI27</b>   | interferon, alpha-inducible protein 27                       | 3429   |
|  | <b>OAS1</b>    | 2',5'-oligoadenylate synthetase 1, 40/46kDa                  | 4938   |
|  | <b>SAMD9L</b>  | sterile alpha motif domain containing 9-like                 | 219285 |
|  | <b>DPYD</b>    | dihydropyrimidine dehydrogenase                              | 1806   |
|  | <b>FYB</b>     | FYN binding protein (FYB-120/130)                            | 2533   |



|                                                                                  |               |                                                           |       |
|----------------------------------------------------------------------------------|---------------|-----------------------------------------------------------|-------|
|    | <b>TRIM22</b> | tripartite motif-containing 22                            | 10346 |
|   | <b>CFH</b>    | complement factor H                                       | 3075  |
|  | <b>NT5E</b>   | 5'-nucleotidase, ecto (CD73)                              | 4907  |
|  | <b>SPARC</b>  | secreted protein, acidic, cysteine-rich (osteonectin)     | 6678  |
|  | <b>IFIT1</b>  | interferon-induced protein with tetratricopeptide repeats | 3434  |
|  | <b>RSAD2</b>  | radical S-adenosyl methionine domain containing 2         | 91543 |
|  | <b>RTP4</b>   | receptor (chemosensory) transporter protein 4             | 64108 |
|  | <b>MX2</b>    | myxovirus (influenza virus) resistance 2 (mouse)          | 4600  |
|  | <b>IFI44L</b> | interferon-induced protein 44-like                        | 10964 |
